# Supplementary material for: Patterns of amenable child mortality over time in 34 member countries of the Organisation for Economic Co-operation and Development (OECD): evidence from a 15-year time trend analysis (2001–2015)
Source: PubMed Central journal article supplement — BMJ Open. 2019 May 22;9(5):e027909. doi: 10.1136/bmjopen-2018-027909 (PMC6538061; doi:10.1136/bmjopen-2018-027909), 2019-05-22
Supplement: bmjopen-2018-027909.draft_revisions.pdf [file bmjopen-2018-027909.draft_revisions.pdf]

# BMJ Open

BMJ Open is committed to open peer review. As part of this commitment we make the peer review history of every article we publish publicly available.

When an article is published we post the peer reviewers' comments and the authors' responses online. We also post the versions of the paper that were used during peer review. These are the versions that the peer review comments apply to.

The versions of the paper that follow are the versions that were submitted during the peer review process. They are not the versions of record or the final published versions. They should not be cited or distributed as the published version of this manuscript.

BMJ Open is an open access journal and the full, final, typeset and author-corrected version of record of the manuscript is available on our site with no access controls, subscription charges or pay-per-view fees (<http://bmjopen.bmj.com>).

If you have any questions on BMJ Open's open peer review process please email [info.bmjopen@bmj.com](mailto:info.bmjopen@bmj.com)

# BMJ Open

## Amenable mortality in children in 34 OECD countries: evidence from a 15-year time trend analysis

|                               |                                                                                                                                                                                                                                                                                                                                                                                                                                                                                                                                                                                                                                                                                                                                                                                                                                                |
|-------------------------------|------------------------------------------------------------------------------------------------------------------------------------------------------------------------------------------------------------------------------------------------------------------------------------------------------------------------------------------------------------------------------------------------------------------------------------------------------------------------------------------------------------------------------------------------------------------------------------------------------------------------------------------------------------------------------------------------------------------------------------------------------------------------------------------------------------------------------------------------|
| Journal:                      | <i>BMJ Open</i>                                                                                                                                                                                                                                                                                                                                                                                                                                                                                                                                                                                                                                                                                                                                                                                                                                |
| Manuscript ID                 | bmjopen-2018-027909                                                                                                                                                                                                                                                                                                                                                                                                                                                                                                                                                                                                                                                                                                                                                                                                                            |
| Article Type:                 | Research                                                                                                                                                                                                                                                                                                                                                                                                                                                                                                                                                                                                                                                                                                                                                                                                                                       |
| Date Submitted by the Author: | 13-Nov-2018                                                                                                                                                                                                                                                                                                                                                                                                                                                                                                                                                                                                                                                                                                                                                                                                                                    |
| Complete List of Authors:     | Gianino, Maria Michela; University of Torino, Dept. Public Health and Pediatrics<br>Lenzi, Jacopo; Alma Mater Studiorum - University of Bologna, Department of Biomedical and Neuromotor Sciences<br>Bonaudo, Marco; Università degli Studi di Torino, Department of Public Health Sciences and Pediatrics<br>Fantini, Maria Pia; University of Bologna, Department of Biomedical and Neuromotor Sciences<br>Siliquini, Roberta; University of Turin, Department of Public Health Sciences and Pediatrics<br>Ricciardi, W; Università Cattolica del Sacro Cuore Sede di Roma, Istituto di Sanità Pubblica; Fondazione Policlinico Universitario 'Agostino Gemelli' IRCCS<br>Damiani, Gianfranco; Università Cattolica del Sacro Cuore Sede di Roma, Istituto di Sanità Pubblica; Fondazione Policlinico Universitario 'Agostino Gemelli' IRCCS |
| Keywords:                     | Community child health < PAEDIATRICS, International health services < HEALTH SERVICES ADMINISTRATION & MANAGEMENT, PUBLIC HEALTH                                                                                                                                                                                                                                                                                                                                                                                                                                                                                                                                                                                                                                                                                                               |
|                               |                                                                                                                                                                                                                                                                                                                                                                                                                                                                                                                                                                                                                                                                                                                                                                                                                                                |

SCHOLARONE™  
Manuscripts

1  
2  
3 **Amenable mortality in children in 34 OECD countries: evidence from a 15-year time trend**  
4  
5 **analysis**  
6  
7  
8  
9

10 **Authors:**

11 Maria Michela Gianino<sup>a</sup>, Jacopo Lenzi<sup>b</sup>, Marco Bonaudo<sup>a</sup>, Maria Pia Fantini<sup>b</sup>, Roberta Siliquini<sup>a</sup>,  
12  
13  
14 Walter Ricciardi<sup>cd</sup>, Gianfranco Damiani<sup>cd</sup>.  
15  
16

17  
18  
19 **Maria Michela Gianino, Professor**

20  
21 a) Department of Public Health Sciences and Pediatrics, Università di Torino

22  
23 Via Santena 5 bis - 10126 Turin (Italy)

24  
25 Tel #: +39(0)116705839 - Fax #: +39(0)116705889

26  
27  
28 [mariola.gianino@unito.it](mailto:mariola.gianino@unito.it)  
29  
30

31  
32  
33 **Jacopo Lenzi, PhD**

34  
35 b) Department of Biomedical and Neuromotor Sciences, Alma Mater Studiorum - Università di

36  
37 Bologna

38  
39 Via Ugo Foscolo 7 - 40123 Bologna (Italy)

40  
41 Tel #: +39(0)512094836

42  
43  
44 [jacopo.lenzi2@unibo.it](mailto:jacopo.lenzi2@unibo.it)  
45  
46

47  
48  
49 **Marco Bonaudo, MSN**

50  
51 a) Department of Public Health Sciences and Pediatrics, Università di Torino

52  
53 Via Santena 5 bis - 10126 Turin (Italy)

54  
55 Tel #: +39(0)116705839 - Fax #: +39(0)116705889

56  
57  
58 [marco.bonaudo@unito.it](mailto:marco.bonaudo@unito.it)  
59  
60

1  
2  
3 **Maria Pia Fantini, MD, Professor**  
4

5 b) Department of Biomedical and Neuromotor Sciences, Alma Mater Studiorum - Università di  
6  
7 Bologna

8  
9 Via Ugo Foscolo 7 - 40123 Bologna (Italy)

10  
11  
12 Tel #: +39(0)512094836

13  
14  
15 [mariapia.fantini@unibo.it](mailto:mariapia.fantini@unibo.it)  
16  
17

18  
19 **Roberta Siliquini, Professor**  
20

21 a) Department of Public Health Sciences and Pediatrics, Università di Torino

22  
23 Via Santena 5 bis - 10126 Turin (Italy)

24  
25  
26 Tel #: +39(0)116705812

27  
28  
29 [roberta.siliquini@unito.it](mailto:roberta.siliquini@unito.it)  
30  
31

32  
33 **Walter Ricciardi, MD, Professor**  
34

35 c) Fondazione Policlinico Universitario 'Agostino Gemelli' IRCCS, Roma, Italia

36  
37 Largo Agostino Gemelli 8 - 00168 Roma (Italia)

38  
39  
40 Tel #: +39(0)630154396

41  
42  
43 [walter.ricciardi@unicatt.it](mailto:walter.ricciardi@unicatt.it)  
44

45 **and**

46 d) Istituto di Sanità Pubblica, Università Cattolica del Sacro Cuore, Roma, Italia

47  
48 Largo Francesco Vito 1 - 00168 Roma (Italia)

49  
50  
51 Tel #: +39(0)630154396

52  
53  
54 [walter.ricciardi@unicatt.it](mailto:walter.ricciardi@unicatt.it)  
55  
56

57  
58 **Gianfranco Damiani MD, Professor**  
59

60 c) Fondazione Policlinico Universitario 'Agostino Gemelli' IRCCS, Roma, Italia

1  
2  
3 Largo Agostino Gemelli 8 - 00168 Roma (Italia)

4  
5 Tel #: +39(0)630154396

6  
7 [gianfranco.damiani@policlinicogemelli.it](mailto:gianfranco.damiani@policlinicogemelli.it)

8  
9  
10 **and**

11  
12 d) Istituto di Sanità Pubblica, Università Cattolica del Sacro Cuore, Roma, Italia

13  
14 Largo Francesco Vito 1 - 00168 Roma (Italia)

15  
16  
17 Tel #: +39(0)630154396

18  
19 [gianfranco.damiani@unicatt.it](mailto:gianfranco.damiani@unicatt.it)

20  
21  
22  
23  
24 **Corresponding Author:**

25  
26 **Marco Bonaudo, MSN**

27  
28 a) Department of Public Health Sciences and Pediatrics, Università di Torino

29  
30 Via Santena 5 bis - 10126 Turin (Italy)

31  
32  
33 Tel #: +39(0)116705839 - Fax #: +39(0)116705889

34  
35 [marco.bonaudo@unito.it](mailto:marco.bonaudo@unito.it)

36  
37  
38  
39  
40 **Words count paper: 2901**

41  
42 **Words count abstract: 236**

## ABSTRACT

**Background.** The children mortality burden conditioned by the performance of the health care system has not been well investigated. This study aimed to analyse the trends of amenable mortality rates (AMRs) in children in 34 OECD countries during 2001-2015.

**Methods.** An observational longitudinal study was performed. Using data from the WHO Mortality Database and Nolte and McKee's list, AMRs were calculated as the annual number of deaths over the population aged  $\leq 14$  years/100,000 inhabitants. The rates were stratified by the age groups (<1, 1-4, 5-9, 10-14 years). All data were summarised by presenting the average rates for the years 2001/2005, 2006/2010, and 2011/2015.

**Results.** There was a significant decline in children's AMRs in the <1 age class in all 34 OECD countries from 2001/2005 to 2006/2010 (from 332.78 to 295.17/100,000;  $\% \Delta$  -11.30%; 95% CI -18.75%, -3.85%) and from 2006/2010 to 2011/2015 (from 295.17 to 240.22/100,000;  $\% \Delta$  -18.62%; 95% CI -26.53%, -10.70%), and a slow decline in the other age classes. The only cause of death that was significantly reduced was conditions originating in the early neonatal period in the <1 age class. The age-specific distribution of causes of deaths did not vary significantly over the study period.

**Conclusion.** The trajectories declined in all OECD countries during 2001-2015: fast in the <1 age class and slow in the other age classes. Therefore, policies that affect the determinants on the supply side are required.

### Strengths and limitations of this study:

1. This is the first study to analyse trends in child mortality amenable to health care.
2. Thirty-four OECD countries were included in the analyses to provide a thorough depiction of amenable child mortality in high-income economies.
3. Mortality was not disaggregated by ethnicity or socioeconomic characteristics.
4. Making international comparisons is difficult due to variations in birth registration laws and death certification practices.

1  
2  
3 **Key words:** Amenable mortality, child, childhood, healthcare, healthcare services, OECD countries  
4  
5  
6

7  
8 **INTRODUCTION**  
9

10 The health of children and adolescents is an important goal for every society, both because they are  
11 vulnerable and because diseases can affect their quality of life.  
12

13 Measures for protecting and improving children's and adolescents' health will yield economic and  
14 social benefits beyond improved health outcomes. Indeed, young people have the potential to affect  
15 the health of future populations as well as global economic development unless timely and effective  
16 strategies are put into place.[1,2]  
17

18 For the adoption of new strategies and the planning of interventions, information on the leading  
19 causes of death is essential. Many studies have analysed the mortality rates and have identified the  
20 main causes of death of children in specific countries[3] or areas.[4] Many different factors contribute  
21 to child and adolescent mortality.[5] Differences in infant mortality rates are noted when grouped by  
22 biological and psychosocial factors, such as sex, race, ethnic origin or disability, in both studies and  
23 national or international statistics.[6] An inverse relationship has been shown between socioeconomic  
24 status and child mortality for all or specific causes.[7,8] Engagement in behaviours such as smoking,  
25 alcohol misuse, drug misuse, poor diet, and physical activity during adolescence increases morbidity  
26 and the risk of premature death.[9] The physical environment is another factor associated with child  
27 mortality. Indeed, studies have demonstrated that children living in the most disadvantaged urban  
28 areas are likely to live close to industrialised and highly populated zones with a greater chance of  
29 being exposed to pollution and a greater risk of road accidents. In the landscape described, the  
30 mortality burden conditioned by the performance of the health care system has not been well  
31 investigated. Although there is no indicator that is able to compressively reflect the performance of  
32 the healthcare system, a suitable measurement seems to be the concept of amenable mortality.  
33

34 Amenable mortality is defined as deaths that, in the light of medical knowledge and technology at the  
35 time of death, could be prevented by timely access to good quality health care.[10,11] Amenable  
36  
37  
38  
39  
40  
41  
42  
43  
44  
45  
46  
47  
48  
49  
50  
51  
52  
53  
54  
55  
56  
57  
58  
59  
60

1  
2  
3 mortality was originally conceptualised by Rutstein et al., who created a list of conditions that were  
4 considered either treatable or preventable given the current medical knowledge and technology,[12]  
5 and amenable mortality has been used as an indicator of the performance of healthcare systems by  
6 the English Department of Health[13] and the Organisation for Economic Cooperation and  
7 Development.[14] Over the last few decades, mortality amenable to healthcare has increasingly been  
8 used to evaluate the effect of healthcare on health outcomes.[15]

9  
10 According to the WHO, an estimated 6.3 million children under the age of 15 years died in 2017; 5.4  
11 million of them were under the age of 5 and 2.5 million of them died within the first month of life.  
12 More than half of these early child deaths were due to conditions that could be prevented or treated  
13 with access to simple, affordable interventions and were, consequently, amenable.[2]

14  
15 The purpose of this study was to analyse the trends of amenable child mortality rates in 34 OECD  
16 countries from 2001-2015 and to evaluate the pattern across age classes.

## 17 18 19 20 21 22 23 24 25 26 27 28 29 30 31 32 33 **MATERIALS AND METHODS**

34  
35 This descriptive study was conducted using secondary data from 34 OECD countries during the  
36 period from 2001 to 2015. Mexico and Turkey, albeit members of the OECD, were not included in  
37 the analysis because these countries are not listed among high-income economies in the World  
38 Development Indicators dataset (gross national income per capita  $\geq$ \$12,056 for fiscal year 2019)[16]  
39 and had limited data availability. The mortality and population data came from the World Health  
40 Organization (WHO) Mortality Database,[17] which comprises deaths registered in national vital  
41 registration systems, with the underlying causes of death coded according to the International  
42 Classification of Diseases. If reference populations were not available in the WHO Mortality  
43 Database, the data were extracted from UNdata.[18] The country-level data availability is presented  
44 in Table S1. The causes of death amenable to health care were selected using the list proposed by  
45 Nolte and McKee[15,19] and used by the OECD to generate estimates of amenable mortality for 31  
46 countries[14] (see Table S2 for Nolte and McKee's list). The aggregation of the causes of death



operated in the WHO Mortality Database prevents the use of the list of amenable deaths currently adopted by Eurostat.[20] For each country, the amenable mortality rates were calculated as the annual number of deaths in the population aged 0–14 years per 100,000 inhabitants. The rates were stratified by the age groups adopted in the WHO Mortality Database (<1, 1–4, 5–9, 10–14 years) and by the 33 disease categories defined by Gay et al..[14] Due to the instability in the estimates of the annual amenable mortality rates, especially for small-population countries, all data were summarised by presenting the average rates for the years 2001/2005, 2006/2010 and 2011/2015. The statistical significance of the percentage changes between these time periods was assessed by building 95% confidence intervals with the formula suggested by Hildebrandt et al..[21] Differences in the ranking of age-specific causes of death between time periods were evaluated with the Friedman test. All data were analysed using the Stata software package, version 15 (StataCorp. 2017. *Stata Statistical Software: Release 15*. College Station, TX: StataCorp LLC).

## RESULTS

### All-cause childhood amenable mortality rates

The results of the trend analyses conducted over the five-year periods 2001/2005, 2006/2010 and 2011/2015 are presented in Table 1 and Table 2.

As shown in Table 1, the amenable mortality rate of the OECD population with <1 year dropped significantly from 2001/2005 to 2006/2010 (from 332.78 to 295.17 per 100,000; %Δ -11.30%; 95% CI -18.75%, -3.85%) and from 2006/2010 to 2011/2015 (from 295.17 to 240.22 per 100,000; %Δ -18.62%; 95% CI -26.53%, -10.70%).

Contrary to the OECD rate of children <1 year, in the population ≥1 year the overall OECD rate did not decrease significantly (Table 1 and Table 2). From 2001/2005 to 2006/2010 and from 2006/2010 to 2011/2015, the mortality rates decreased by 13.37% and 13.02%, respectively, for the 1-4 age group; 11.94% and 11.26%, respectively, for the 5-9 age group; and 13.53% and 13.08%, respectively, for the 10-14 age group.

1  
2  
3 Following these reductions, the 2011/2015 overall amenable mortality rate in children <1 year was  
4  
5 240.22 per 100,000. In children aged 1-4, the rate dropped to 4.73 per 100,000 and reached the lowest  
6  
7 value between 5 and 9 years (2.02 per 100,000). Between 10 and 14 years of age, the rate was 2.16  
8  
9 per 100,000.  
10  
11  
12  
13  
14  
15  
16  
17  
18  
19  
20  
21  
22  
23  
24  
25  
26  
27  
28  
29  
30  
31  
32  
33  
34  
35  
36  
37  
38  
39  
40  
41  
42  
43  
44  
45  
46  
47  
48  
49  
50  
51  
52  
53  
54  
55  
56  
57  
58  
59  
60

For peer review only

**Table 1. Yearly Amenable Mortality Rates (Per 100,000) for Ages <1 and 1–4 Years in 34 OECD Countries, 2001/2005, 2006/2010 and 2011/2015 (See Table S1 for Country-Level Data Availability).**

| Country | <1 Year                        |           |           |                          |                           | 1–4 Years                      |           |           |                        |                        |
|---------|--------------------------------|-----------|-----------|--------------------------|---------------------------|--------------------------------|-----------|-----------|------------------------|------------------------|
|         | Yearly Amenable Mortality Rate |           |           | % Change (95% CI)        |                           | Yearly Amenable Mortality Rate |           |           | % Change (95% CI)      |                        |
|         | 2001/2005                      | 2006/2010 | 2011/2015 | 2006/10 – 2001/05        | 2011/15 – 2006/10         | 2001/2005                      | 2006/2010 | 2011/2015 | 2006/10 – 2001/05      | 2011/15 – 2006/10      |
| CA      | 343.10                         | 343.46    | 332.97    | .1 (-7.9, 8.1)           | -3.1 (-10.7, 4.5)         | 4.34                           | 4.09      | 3.98      | -5.7 (-39.7, 28.2)     | -2.6 (-37.7, 32.5)     |
| US      | 415.80                         | 382.24    | 350.87    | -8.1 (-10.1, -6.1) *     | -8.2 (-10.3, -6.1) *      | 6.00                           | 5.46      | 5.13      | -8.9 (-17.2, -.6) *    | -6.1 (-14.9, 2.8)      |
| CL      | 478.56                         | 457.40    | 427.15    | -4.4 (-12.2, 3.4)        | -6.6 (-14.4, 1.2)         | 10.11                          | 7.50      | 5.90      | -25.8 (-47.9, -3.8) *  | -21.3 (-48.2, 5.6)     |
| IL      | 291.77                         | 221.77    | 189.73    | -24 (-34.9, -13.1) *     | -14.4 (-27.4, -1.5) *     | 6.89                           | 4.62      | 3.86      | -32.9 (-66, .2)        | -16.5 (-61.6, 28.6)    |
| JP      | 150.76                         | 121.39    | 97.24     | -19.5 (-25.3, -13.7) *   | -19.9 (-26.5, -13.3) *    | 8.78                           | 7.84      | 7.15      | -10.7 (-23.6, 2.2)     | -8.7 (-23, 5.5)        |
| KR      | 334.41                         | 235.84    | 198.16    | -29.5 (-35, -24) *       | -16 (-23.5, -8.4) *       | 8.50                           | 6.69      | 4.59      | -21.3 (-38.9, -3.8) *  | -31.5 (-50.3, -12.6) * |
| DK      | 285.08                         | 191.17    | 220.19    | -32.9 (-48.2, -17.7) *   | 15.2 (-13.3, 43.6)        | 6.16                           | 3.87      | 3.11      | -37.2 (-86.4, 12)      | -19.6 (-94.7, 55.6)    |
| IS      | 134.24                         | 127.50    | 85.5      | -5 (-114.3, 95)          | -32.9 (-119.1, 53.2)      | 4.74                           | 6.78      | 2.14      | 43.2 (-361.8, 143.2)   | -68.4 (-181.5, 31.6)   |
| FI      | 186.77                         | 151.76    | 109.42    | -18.7 (-41.6, 4.1)       | -27.9 (-50.9, -4.9) *     | 4.46                           | 3.25      | 2.80      | -27.2 (-95.6, 41.2)    | -14 (-103, 75)         |
| NO      | 207.32                         | 186.37    | 149.55    | -10.1 (-33.4, 13.1)      | -19.8 (-42, 2.5)          | 5.77                           | 4.56      | 3.36      | -21 (-84.1, 42.2)      | -26.4 (-92.8, 40)      |
| SE      | 178.05                         | 136.44    | 130.95    | -23.4 (-40.2, -6.6) *    | -4 (-25.8, 17.8)          | 4.44                           | 4.03      | 2.82      | -9.2 (-70.6, 52.3)     | -30.1 (-80.6, 20.5)    |
| AT      | 297.83                         | 243.56    | 198.02    | -18.2 (-34, -2.5) *      | -18.7 (-35.9, -1.5) *     | 4.72                           | 4.54      | 3.62      | -3.7 (-73, 65.6)       | -20.4 (-81.8, 41.1)    |
| BE      | 244.36                         | 220.91    | 198.89    | -9.6 (-24.7, 5.5)        | -10 (-25.4, 5.4)          | 5.25                           | 3.82      | 4.09      | -27.3 (-71.3, 16.7)    | 7.1 (-59.6, 73.7)      |
| FR      | 237.86                         | 216.89    | 211.19    | -8.8 (-14.9, -2.8) *     | -2.6 (-9.3, 4)            | 3.98                           | 3.73      | 2.82      | -6.2 (-30.3, 17.8)     | -24.3 (-45.4, -3.3) *  |
| DE      | 245.69                         | 223.48    | 206.37    | -9 (-15.3, -2.8) *       | -7.7 (-14.3, -1) *        | 5.31                           | 4.27      | 4.19      | -19.6 (-38.6, -.6) *   | -1.9 (-27, 23.3)       |
| LU      | 218.18                         | 111.42    | 126.65    | -48.9 (-98.7, .8)        | 13.7 (-106.8, 113.7)      | 0.88                           | 1.76      | 1.62      | 98.8 (-968.1, 198.8)   | -7.6 (-412.5, 92.4)    |
| NL      | 306.18                         | 257.29    | 234.49    | -16 (-26, -5.9) *        | -8.9 (-20.9, 3.2)         | 4.66                           | 4.63      | 3.03      | -8 (-46.3, 44.8)       | -34.6 (-69.4, .3)      |
| CH      | 274.24                         | 272.00    | 251.67    | -8 (-20.1, 18.5)         | -7.5 (-25.4, 10.5)        | 4.22                           | 2.95      | 2.02      | -30.2 (-90.2, 29.8)    | -31.3 (-100.6, 38)     |
| IE      | 247.00                         | 198.95    | 184.09    | -19.5 (-38.2, -.7) *     | -7.5 (-29.5, 14.6)        | 6.28                           | 2.53      | 3.18      | -59.7 (-97.1, -22.3) * | 25.6 (-100.4, 125.6)   |
| GB      | 346.07                         | 305.01    | 256.65    | -11.9 (-16.9, -6.8) *    | -15.9 (-20.8, -10.9) *    | 6.33                           | 5.65      | 4.96      | -10.7 (-29.7, 8.4)     | -12.2 (-31.4, 6.9)     |
| GR      | 305.19                         | 218.33    | 222.92    | -28.5 (-40.3, -16.6) *   | 2.1 (-16.4, 20.6)         | 5.54                           | 5.36      | 4.62      | -3.4 (-59.2, 52.5)     | -13.8 (-65.2, 37.7)    |
| IT      | 299.93                         | 256.16    | 224.78    | -14.6 (-20.7, -8.5) *    | -12.2 (-19, -5.5) *       | 4.96                           | 4.05      | 4.15      | -18.4 (-41.2, 4.5)     | 2.4 (-27.3, 32.2)      |
| PT      | 300.62                         | 219.72    | 219.56    | -26.9 (-39.2, -14.6) *   | -.1 (-19.2, 19)           | 8.41                           | 3.92      | 4.19      | -53.4 (-80.4, -26.4) * | 6.9 (-66.3, 80.1)      |
| ES      | 272.67                         | 231.74    | 204.24    | -15 (-21.9, -8.1) *      | -11.9 (-19.6, -4.2) *     | 6.23                           | 5.13      | 3.59      | -17.6 (-40.6, 5.3)     | -30 (-51.6, -8.4) *    |
| CZ      | 259.40                         | 209.92    | 166.61    | -19.1 (-33.5, -4.7) *    | -20.6 (-35.9, -5.4) *     | 4.74                           | 4.43      | 3.24      | -6.7 (-68, 54.7)       | -26.9 (-76.7, 23)      |
| EE      | 394.90                         | 262.22    | 139.38    | -33.6 (-60.7, -6.5) *    | -46.8 (-75.4, -18.3) *    | 6.91                           | 4.89      | 7.25      | -29.3 (-140.4, 70.7)   | 48.4 (-174, 148.4)     |
| HU      | 530.50                         | 406.91    | 348.94    | -23.3 (-33.4, -13.2) *   | -14.2 (-27, -1.5) *       | 7.03                           | 6.18      | 5.80      | -12.2 (-60.5, 36.1)    | -6 (-60.7, 48.6)       |
| LV      | 561.36                         | 440.42    | 324.98    | -21.5 (-42.6, -.5) *     | -26.2 (-49.2, -3.2) *     | 7.23                           | 6.54      | 3.42      | -9.5 (-115.5, 90.5)    | -47.8 (-122.7, 27.2)   |
| LT      | 412.34                         | 342.21    | 225.15    | -17 (-38.6, 4.6)         | -34.2 (-54.3, -14.1) *    | 7.14                           | 5.92      | 5.34      | -17.2 (-98.9, 64.5)    | -9.7 (-107.2, 87.7)    |
| PL      | 488.86                         | 400.92    | 315.70    | -18 (-23.5, -12.4) *     | -21.3 (-27.2, -15.3) *    | 7.81                           | 8.35      | 6.69      | 6.9 (-20.1, 33.9)      | -19.9 (-40.6, .8)      |
| SK      | 432.24                         | 373.71    | 345.44    | -13.5 (-29.7, 2.6)       | -7.6 (-25.5, 10.4)        | 13.09                          | 11.08     | 9.26      | -15.3 (-61.5, 30.8)    | -16.4 (-65.1, 32.2)    |
| SI      | 270.48                         | 203.78    | 143.64    | -24.7 (-55.9, 6.5)       | -29.5 (-62.2, 3.2)        | 5.01                           | 3.69      | 3.87      | -26.3 (-141.4, 73.7)   | 4.8 (-161, 104.8)      |
| AU      | 290.88                         | 261.16    | 212.74    | -10.2 (-19.4, -1) *      | -18.5 (-27.1, -9.9) *     | 5.13                           | 4.43      | 3.40      | -13.6 (-47.3, 20)      | -23.3 (-55.2, 8.6)     |
| NZ      | 317.89                         | 286.41    | 294.76    | -9.9 (-28.6, 8.8)        | 2.9 (-18.4, 24.2)         | 5.14                           | 4.98      | 6.23      | -3.1 (-81.6, 75.5)     | 24.9 (-69.4, 119.3)    |
| All     | 332.78                         | 295.17    | 240.22    | -11.30 (-18.75, -3.85) * | -18.62 (-26.53, -10.70) * | 6.27                           | 5.43      | 4.73      | -13.37 (-40.12, 13.39) | -13.02 (-43.46, 17.42) |

\* Percentage decrease is statistically significant ( $P < 0.05$ ).

**Table 2. Yearly Amenable Mortality Rates (Per 100,000) for Ages 5–9 and 10–14 Years in 34 OECD Countries, 2001/2005, 2006/2010 and 2011/2015 (See Table S1 for Country-Level Data Availability).**

| Country | 5–9 Years                      |           |           |                        |                        | 10–14 Years                    |           |           |                        |                         |
|---------|--------------------------------|-----------|-----------|------------------------|------------------------|--------------------------------|-----------|-----------|------------------------|-------------------------|
|         | Yearly Amenable Mortality Rate |           |           | % Change (95% CI)      |                        | Yearly Amenable Mortality Rate |           |           | % Change (95% CI)      |                         |
|         | 2001/2005                      | 2006/2010 | 2011/2015 | 2006/10 – 2001/05      | 2011/15 – 2006/10      | 2001/2005                      | 2006/2010 | 2011/2015 | 2006/10 – 2001/05      | 2011/15 – 2006/10       |
| CA      | 1.92                           | 2.11      | 1.38      | 9.7 (-39.8, 59.2)      | -34.6 (-67.4, -1.8) *  | 1.80                           | 1.80      | 1.91      | .3 (-45.4, 45.9)       | 5.7 (-43, 54.4)         |
| US      | 2.58                           | 2.38      | 2.23      | -7.6 (-19.1, 3.9)      | -6.4 (-18.4, 5.6)      | 3.06                           | 2.76      | 2.52      | -9.6 (-19.9, .6)       | -8.9 (-19.8, 2)         |
| CL      | 3.69                           | 3.17      | 2.94      | -14.1 (-49.6, 21.4)    | -7.2 (-48.8, 34.4)     | 3.72                           | 3.16      | 3.11      | -15 (-48.8, 18.8)      | -1.4 (-43.8, 41)        |
| IL      | 1.73                           | 2.05      | 2.10      | 18.2 (-75.1, 111.5)    | 2.6 (-70.9, 76.2)      | 2.54                           | 2.04      | 1.73      | -19.8 (-79.8, 40.1)    | -14.8 (-81.9, 52.4)     |
| JP      | 2.67                           | 2.50      | 2.40      | -6.2 (-27.4, 15.1)     | -3.9 (-26.8, 19)       | 2.55                           | 2.17      | 2.20      | -14.8 (-34.7, 5.1)     | 1.2 (-23.7, 26.1)       |
| KR      | 3.42                           | 2.39      | 1.86      | -30.1 (-50.9, -9.4) *  | -22 (-51.6, 7.5)       | 3.58                           | 2.55      | 1.99      | -28.9 (-48.4, -9.3) *  | -21.7 (-47.8, 4.3)      |
| DK      | 1.78                           | 1.32      | 1.21      | -25.8 (-116.5, 64.9)   | -8.4 (-32.4, 91.6)     | 2.10                           | 1.78      | 0.72      | -15.6 (-106.8, 75.6)   | -59.7 (-119.8, 4)       |
| IS      | 2.00                           | 2.08      | 0.94      | 4.2 (-112.8, 104.2)    | -54.9 (-118.9, 9)      | 1.71                           | 1.98      | 1.23      | 15.9 (-116.5, 115.9)   | -37.8 (-118.6, 43)      |
| FI      | 0.00                           | 0.94      | 1.80      | N/A                    | 92.2 (-939.2, 192.2)   | 1.75                           | 4.48      | 2.81      | 156.1 (-783, 256.1)    | -37.2 (-238.1, 62.8)    |
| NO      | 2.73                           | 2.20      | 1.62      | -19.4 (-101.6, 62.7)   | -26.3 (-111.9, 59.3)   | 2.14                           | 1.53      | 1.49      | -28.8 (-112.5, 54.9)   | -2.6 (-127.2, 97.4)     |
| SE      | 1.45                           | 1.56      | 1.53      | 8.2 (-100.9, 108.2)    | -2.1 (-98.2, 94)       | 2.56                           | 1.80      | 1.83      | -29.7 (-86.2, 26.7)    | 1.6 (-90.3, 93.4)       |
| AT      | 2.35                           | 1.36      | 1.53      | -42.1 (-101.4, 17.2)   | 12.7 (-116.1, 112.7)   | 2.03                           | 2.18      | 1.62      | 7.8 (-86.9, 102.6)     | -25.9 (-97.9, 46.2)     |
| BE      | 2.02                           | 2.13      | 1.52      | 5.5 (-77.9, 88.9)      | -28.7 (-88.6, 31.2)    | 2.41                           | 1.96      | 1.53      | -18.6 (-80.2, 43)      | -22.1 (-88.6, 44.3)     |
| FR      | 1.89                           | 1.52      | 1.25      | -19.7 (-47.7, 8.3)     | -17.5 (-48.8, 13.8)    | 1.96                           | 1.59      | 1.41      | -18.8 (-46.4, 8.9)     | -11.5 (-43.9, 20.8)     |
| DE      | 2.33                           | 1.80      | 1.83      | -22.9 (-47, 1.2)       | 1.6 (-33.1, 36.2)      | 2.55                           | 2.09      | 1.78      | -18 (-41.1, 5.1)       | -15.1 (-42.3, 12.1)     |
| LU      | 1.38                           | 1.69      | 1.98      | 22.6 (-487, 122.6)     | 17.4 (-423.1, 117.4)   | 2.88                           | 1.98      | 0.64      | -31.1 (-261.7, 68.9)   | -67.5 (-231.9, 32.5)    |
| NL      | 2.14                           | 1.76      | 1.43      | -17.8 (-69.7, 34.1)    | -18.8 (-76.2, 38.6)    | 2.89                           | 2.12      | 1.85      | -26.6 (-67.9, 14.8)    | -12.7 (-67.2, 41.8)     |
| CH      | 1.52                           | 1.82      | 1.37      | 19.8 (-109.7, 119.8)   | -24.5 (-109.3, 60.2)   | 2.24                           | 1.23      | 1.58      | -45.2 (-103.5, 13.2)   | 27.9 (-120.1, 127.9)    |
| IE      | 3.03                           | 1.86      | 1.29      | -38.7 (-104.6, 27.1)   | -30.4 (-118.1, 57.3)   | 2.98                           | 2.12      | 1.96      | -28.7 (-103.4, 45.9)   | -7.8 (-112.1, 92.2)     |
| GB      | 2.98                           | 2.59      | 2.13      | -13.1 (-37.5, 11.2)    | -17.8 (-42.7, 7)       | 3.18                           | 2.76      | 2.35      | -13 (-35.9, 9.9)       | -14.8 (-39.5, 9.9)      |
| GR      | 3.13                           | 2.54      | 2.18      | -18.8 (-77.5, 39.9)    | -14.2 (-81.6, 53.1)    | 3.55                           | 2.63      | 2.79      | -25.7 (-76.1, 24.7)    | 6 (-71.2, 83.2)         |
| IT      | 2.36                           | 2.08      | 1.86      | -11.8 (-43.2, 19.7)    | -10.6 (-44, 22.8)      | 2.84                           | 2.29      | 2.19      | -19.3 (-45.8, 7.3)     | -4.2 (-37.7, 29.2)      |
| PT      | 3.23                           | 1.67      | 1.67      | -48.2 (-89.4, -7) *    | .1 (-92.8, 93)         | 4.53                           | 2.66      | 1.87      | -41.2 (-78.8, -3.6) *  | -29.7 (-85.5, 26.1)     |
| ES      | 3.04                           | 2.45      | 2.02      | -19.3 (-49.1, 10.5)    | -17.5 (-49.4, 14.4)    | 3.40                           | 2.64      | 2.14      | -22.3 (-49.6, 5)       | -18.9 (-50.2, 12.4)     |
| CZ      | 2.15                           | 2.26      | 2.27      | 5.2 (-84.8, 95.3)      | .7 (-82.6, 84)         | 2.67                           | 2.25      | 1.87      | -15.7 (-79.5, 48)      | -17 (-90.8, 56.8)       |
| EE      | 3.32                           | 3.50      | 1.40      | 5.7 (-191.8, 105.7)    | -60.2 (-154.3, 34)     | 4.61                           | 1.84      | 1.79      | -60 (-141.2, 21.2)     | -3 (-253.9, 97)         |
| HU      | 3.34                           | 2.36      | 2.44      | -29.4 (-81.9, 23.1)    | 3.3 (-80.6, 87.3)      | 3.58                           | 3.50      | 2.92      | -2.3 (-62.7, 58)       | -16.5 (-74.2, 41.2)     |
| LV      | 4.53                           | 4.62      | 3.53      | 1.9 (-129.9, 101.9)    | -23.4 (-130.1, 76.6)   | 3.65                           | 4.06      | 1.32      | 11 (-128.4, 111)       | -67.4 (-133.5, -1.3) *  |
| LT      | 3.82                           | 3.35      | 2.78      | -12.2 (-110.1, 85.6)   | -16.9 (-126.8, 83.1)   | 3.08                           | 4.14      | 1.21      | 34.2 (-98.2, 134.2)    | -70.7 (-118.1, -23.2) * |
| PL      | 2.99                           | 3.14      | 2.97      | 4.9 (-32.2, 41.9)      | -5.3 (-40, 29.4)       | 3.03                           | 3.52      | 3.30      | 16.1 (-20.2, 52.4)     | -6.1 (-37.7, 25.5)      |
| SK      | 3.27                           | 4.34      | 3.19      | 32.7 (-78.9, 132.7)    | -26.5 (-91.2, 38.2)    | 3.70                           | 4.23      | 3.35      | 14.4 (-71.3, 100.1)    | -20.9 (-87.9, 46.2)     |
| SI      | 1.67                           | 2.20      | 1.64      | 31.6 (-242, 131.6)     | -25.6 (-180.2, 74.4)   | 2.61                           | 1.24      | 1.74      | -52.4 (-153.7, 47.6)   | 40.3 (-291.8, 140.3)    |
| AU      | 2.14                           | 1.81      | 1.76      | -15.6 (-61.1, 30)      | -2.5 (-56.6, 51.6)     | 2.24                           | 2.13      | 1.80      | -4.8 (-52.7, 43.1)     | -15.6 (-60.3, 29.1)     |
| NZ      | 2.11                           | 2.01      | 1.37      | -5 (-112.6, 95)        | -32 (-118.6, 54.6)     | 3.04                           | 2.71      | 2.96      | -10.6 (-94.3, 73.1)    | 9.1 (-95.1, 109.1)      |
| All     | 2.59                           | 2.28      | 2.02      | -11.94 (-49.31, 25.43) | -11.26 (-53.86, 31.34) | 2.87                           | 2.48      | 2.16      | -13.53 (-47.69, 20.63) | -13.08 (-52.82, 26.65)  |

\* Percentage decrease is statistically significant ( $P < 0.05$ ).

### Cause-specific childhood mortality rates

Examining the distribution of cause-specific mortality rates across multiple age groups and study periods, we found no statistically significant variations in the OECD countries studied. The only exception was a significant decrease in deaths in the first year of life for conditions originating in the early neonatal period (2001/2005 - 2006/2010: from 266.3 to 239.8 per 100,000,  $\% \Delta$  -9.9% [95% CI -18.4%, -1.5%]; 2006/2010 - 2011/2015: from 239.8 to 193.8 per 100,000,  $\% \Delta$  -19.2% [95% CI -27.9%, -10.4%]) (Table S3).

Despite this variation, globally, for the years 2001/2005, 2006/2010 and 2011/2015, there were no significant differences in the age-specific percentage distribution of causes of death (<1 years: Friedman test 0.955, P 0.372, 1-4 years: Friedman test 0.864, P 0.607; 5-9 years: Friedman test 0.470, P 0.740; 10-14 years: Friedman test 1.773, P 0.398) The three leading causes of death by age groups over the 15-year study period were the following: conditions originating in the early neonatal period, congenital cardiovascular anomalies, and pneumonia for <1 year; congenital cardiovascular anomalies, leukaemia, and respiratory diseases (excl. pneumonia/flu) for all other age groups (Table 3).

**Table 3. Percentage Distribution of the Causes of Death Amenable to Healthcare in 34 OECD Countries, Years 2001/2005, 2006/2010 and 2011/2015.**

| Cause of Death                                                  | <1 Year Rank (%) |            |            | 1–4 Years Rank (%) |            |            | 5–9 Years Rank (%) |            |            | 10–14 Years Rank (%) |            |            |
|-----------------------------------------------------------------|------------------|------------|------------|--------------------|------------|------------|--------------------|------------|------------|----------------------|------------|------------|
|                                                                 | 2001/05          | 2006/10    | 2011/15    | 2001/05            | 2006/10    | 2011/15    | 2001/05            | 2006/10    | 2011/15    | 2001/05              | 2006/10    | 2011/15    |
| Tuberculosis                                                    | #16 (0.01)       | #18 (0.01) | #19 (0.00) | #15 (0.27)         | #16 (0.24) | #16 (0.24) | #17 (0.31)         | #18 (0.28) | #21 (0.11) | #19 (0.35)           | #20 (0.17) | #20 (0.22) |
| Septicaemia                                                     | #4 (1.50)        | #4 (1.39)  | #4 (1.04)  | #5 (7.57)          | #5 (8.18)  | #6 (6.88)  | #7 (5.15)          | #7 (5.67)  | #7 (5.26)  | #7 (4.17)            | #7 (4.92)  | #7 (4.29)  |
| Pneumonia                                                       | #3 (1.82)        | #3 (1.53)  | #3 (1.30)  | #4 (12.35)         | #4 (12.20) | #4 (12.24) | #4 (8.58)          | #4 (7.90)  | #5 (9.12)  | #6 (7.59)            | #6 (6.73)  | #6 (7.27)  |
| Influenza                                                       | #13 (0.08)       | #13 (0.08) | #13 (0.09) | #10 (2.16)         | #10 (1.92) | #10 (2.39) | #9 (1.66)          | #8 (2.54)  | #8 (2.97)  | #11 (1.15)           | #9 (2.15)  | #9 (1.77)  |
| Intestinal infections other than typhoid, diphtheria (0–14 yrs) | #7 (0.27)        | #5 (0.60)  | #5 (0.72)  | #9 (2.45)          | #9 (3.05)  | #8 (3.98)  | #13 (0.87)         | #12 (1.25) | #10 (2.00) | #16 (0.54)           | #15 (0.62) | #13 (1.00) |
| Diphtheria, Tetanus, Poliomyelitis                              | #24 (0.00)       | #25 (0.00) | #25 (0.00) | #28 (0.01)         | #30 (0.00) | #30 (0.00) | #26 (0.03)         | #26 (0.03) | #26 (0.02) | #30 (0.02)           | #32 (0.00) | #30 (0.00) |
| Whooping cough (0–14 yrs)                                       | #11 (0.11)       | #12 (0.10) | #10 (0.19) | #26 (0.02)         | #27 (0.01) | #22 (0.05) | #30 (0.00)         | #31 (0.00) | #26 (0.02) | #30 (0.02)           | #30 (0.03) | #30 (0.00) |
| Measles (1–14 yrs)                                              | #29 (0.00)       | #30 (0.00) | #25 (0.00) | #21 (0.15)         | #30 (0.00) | #23 (0.02) | #19 (0.27)         | #29 (0.01) | #28 (0.00) | #24 (0.11)           | #27 (0.07) | #27 (0.04) |
| Colorectal cancer                                               | #22 (0.00)       | #22 (0.00) | #19 (0.00) | #25 (0.03)         | #23 (0.03) | #23 (0.02) | #24 (0.06)         | #22 (0.07) | #25 (0.07) | #18 (0.36)           | #18 (0.24) | #17 (0.39) |
| Malignant neoplasm of skin                                      | #24 (0.00)       | #26 (0.00) | #23 (0.00) | #26 (0.02)         | #25 (0.02) | #28 (0.01) | #26 (0.03)         | #24 (0.06) | #23 (0.09) | #27 (0.04)           | #26 (0.09) | #23 (0.10) |
| Breast cancer                                                   | #23 (0.00)       | #23 (0.00) | #23 (0.00) | #29 (0.00)         | #27 (0.01) | #23 (0.02) | #25 (0.04)         | #26 (0.03) | #28 (0.00) | #32 (0.01)           | #29 (0.04) | #30 (0.00) |
| Cervical cancer and uterine cancer                              | #24 (0.00)       | #26 (0.00) | #25 (0.00) | #29 (0.00)         | #26 (0.02) | #23 (0.02) | #30 (0.00)         | #29 (0.01) | #28 (0.00) | #29 (0.03)           | #31 (0.01) | #27 (0.04) |
| Neoplasm of the testis                                          | #24 (0.00)       | #23 (0.00) | #25 (0.00) | #23 (0.05)         | #21 (0.05) | #23 (0.02) | #26 (0.03)         | #26 (0.03) | #23 (0.09) | #23 (0.13)           | #25 (0.11) | #21 (0.14) |
| Hodgkin's disease                                               | #29 (0.00)       | #26 (0.00) | #25 (0.00) | #24 (0.04)         | #27 (0.01) | #28 (0.01) | #16 (0.35)         | #17 (0.31) | #15 (0.31) | #13 (0.83)           | #13 (0.92) | #15 (0.57) |
| Leukaemia                                                       | #8 (0.21)        | #8 (0.26)  | #8 (0.24)  | #3 (14.55)         | #3 (13.99) | #2 (14.99) | #1 (31.72)         | #1 (28.35) | #1 (27.31) | #1 (31.3)            | #1 (30.01) | #1 (30.24) |
| Thyroid disorders                                               | #17 (0.01)       | #21 (0.01) | #22 (0.00) | #22 (0.10)         | #21 (0.05) | #21 (0.07) | #23 (0.10)         | #24 (0.06) | #21 (0.11) | #24 (0.11)           | #24 (0.12) | #24 (0.08) |
| Diabetes mellitus                                               | #21 (0.01)       | #15 (0.02) | #17 (0.01) | #13 (0.42)         | #13 (0.38) | #14 (0.31) | #12 (0.97)         | #13 (0.86) | #13 (0.81) | #8 (2.49)            | #8 (2.31)  | #8 (1.97)  |
| Epilepsy                                                        | #9 (0.17)        | #9 (0.17)  | #9 (0.23)  | #7 (5.16)          | #7 (5.50)  | #5 (7.20)  | #5 (7.81)          | #5 (7.86)  | #4 (10.37) | #5 (7.73)            | #5 (7.89)  | #4 (10.36) |
| Rheumatic heart diseases                                        | #15 (0.02)       | #17 (0.01) | #18 (0.01) | #18 (0.21)         | #15 (0.25) | #20 (0.12) | #17 (0.31)         | #20 (0.15) | #18 (0.20) | #17 (0.46)           | #17 (0.34) | #18 (0.28) |
| Ischemic heart diseases: 50% of deaths                          | #14 (0.04)       | #14 (0.04) | #14 (0.03) | #16 (0.25)         | #17 (0.22) | #15 (0.28) | #15 (0.38)         | #15 (0.40) | #16 (0.24) | #15 (0.63)           | #16 (0.59) | #14 (0.59) |
| Cerebrovascular diseases                                        | #6 (0.51)        | #6 (0.60)  | #6 (0.38)  | #8 (3.86)          | #8 (4.13)  | #9 (3.38)  | #6 (6.87)          | #6 (7.13)  | #6 (6.69)  | #4 (8.12)            | #4 (8.99)  | #5 (9.08)  |
| Hypertensive diseases                                           | #19 (0.01)       | #16 (0.01) | #15 (0.01) | #20 (0.17)         | #20 (0.13) | #18 (0.19) | #21 (0.19)         | #19 (0.21) | #18 (0.20) | #21 (0.22)           | #19 (0.18) | #24 (0.08) |
| Nephritis and nephrosis                                         | #5 (0.54)        | #7 (0.49)  | #7 (0.25)  | #11 (1.41)         | #11 (1.48) | #12 (1.12) | #10 (1.60)         | #10 (1.69) | #11 (1.72) | #9 (1.79)            | #10 (1.91) | #12 (1.24) |
| Benign prostatic hyperplasia                                    | #29 (0.00)       | #30 (0.00) | #25 (0.00) | #29 (0.00)         | #30 (0.00) | #30 (0.00) | #30 (0.00)         | #31 (0.00) | #28 (0.00) | #33 (0.00)           | #32 (0.00) | #30 (0.00) |
| All respiratory diseases, excl. pneumonia/influenza (1–14 yrs)  | #29 (0.00)       | #30 (0.00) | #25 (0.00) | #2 (15.6)          | #2 (16.79) | #3 (14.25) | #3 (12.91)         | #2 (16.28) | #2 (13.87) | #3 (13.66)           | #2 (15.28) | #2 (13.66) |
| Peptic ulcer                                                    | #17 (0.01)       | #19 (0.01) | #19 (0.00) | #19 (0.19)         | #19 (0.17) | #16 (0.24) | #22 (0.16)         | #21 (0.13) | #18 (0.20) | #20 (0.24)           | #20 (0.17) | #19 (0.26) |
| Appendicitis                                                    | #20 (0.01)       | #19 (0.01) | #16 (0.01) | #14 (0.3)          | #17 (0.22) | #19 (0.18) | #14 (0.78)         | #14 (0.75) | #14 (0.46) | #14 (0.79)           | #14 (0.75) | #16 (0.53) |
| Abdominal hernia                                                | #10 (0.17)       | #10 (0.13) | #12 (0.11) | #17 (0.24)         | #14 (0.36) | #13 (0.33) | #20 (0.21)         | #16 (0.33) | #17 (0.22) | #22 (0.20)           | #22 (0.15) | #21 (0.14) |
| Cholelithiasis and cholecystitis                                | #24 (0.00)       | #26 (0.00) | #25 (0.00) | #29 (0.00)         | #23 (0.03) | #30 (0.00) | #26 (0.03)         | #22 (0.07) | #28 (0.00) | #27 (0.04)           | #28 (0.05) | #27 (0.04) |
| Maternal deaths                                                 | #29 (0.00)       | #30 (0.00) | #25 (0.00) | #29 (0.00)         | #30 (0.00) | #30 (0.00) | #30 (0.00)         | #31 (0.00) | #28 (0.00) | #26 (0.08)           | #23 (0.13) | #26 (0.06) |
| Conditions originating in the early neonatal period             | #1 (80.02)       | #1 (81.25) | #1 (80.69) | #6 (5.59)          | #6 (5.6)   | #7 (5.06)  | #8 (2.25)          | #9 (2.48)  | #9 (2.80)  | #10 (1.57)           | #11 (1.78) | #10 (1.52) |

1  
2  
3  
4  
5  
6  
7  
8  
9  
10  
11  
12  
13  
14  
15  
16  
17  
18  
19  
20  
21  
22  
23  
24  
25  
26  
27  
28  
29  
30  
31  
32  
33  
34  
35  
36  
37  
38  
39  
40  
41  
42  
43  
44  
45  
46

|                                                            |                  |                |                  |                 |               |               |               |             |             |             |               |             |
|------------------------------------------------------------|------------------|----------------|------------------|-----------------|---------------|---------------|---------------|-------------|-------------|-------------|---------------|-------------|
| Congenital cardiovascular anomalies                        | #2 (14.38)       | #2 (13.15)     | #2 (14.55)       | #1 (25.67)      | #1 (23.63)    | #1 (25.21)    | #2 (14.91)    | #3 (13.67)  | #3 (13.12)  | #2 (14.13)  | #3 (12.17)    | #3 (12.62)  |
| Misadventures to patients during surgical and medical care | #12 (0.09)       | #11 (0.11)     | #11 (0.11)       | #12 (1.17)      | #12 (1.33)    | #11 (1.18)    | #11 (1.41)    | #11 (1.37)  | #12 (1.61)  | #12 (1.08)  | #12 (1.08)    | #11 (1.40)  |
| <i>Total number of deaths</i>                              | <i>190 169.5</i> | <i>175 008</i> | <i>105 210.5</i> | <i>14 437.5</i> | <i>12 738</i> | <i>8491.5</i> | <i>7704.5</i> | <i>6706</i> | <i>4541</i> | <i>9109</i> | <i>7578.5</i> | <i>4921</i> |

For peer review only

## Country-specific childhood amenable mortality rates

The amenable mortality rate for the population aged <1 year dropped significantly over the study period in 24 countries (United States, Israel, Japan, South Korea, Czech Republic, Estonia, France, Germany, Italy, Greece, Latvia, Lithuania, Hungary, Denmark, Finland, Sweden, Poland, Spain, Netherland, Austria, Portugal, Ireland, United Kingdom and Australia). In addition to the decrease in conditions originating in early neonatal period mortality, other causes contributed to a significant reduction in mortality: septicaemia, pneumonia and nephritis/nephrosis played roles in the United States, septicaemia played a role in Poland, and congenital cardiovascular anomalies played roles in Japan and Spain (Table S4).

Although the overall OECD rate did not decrease significantly in the population aged  $\geq 1$  years, some country-specific data exhibited significant trends (Tables 1). In 8 countries (Chile, United States, South Korea, France, Germany, Ireland, Portugal and Spain), there was a significant decrease in the mortality rate of children aged 1 to 4 (Table 1); the decline in pneumonia played an important role in Chile and the United States, respiratory diseases in South Korea, Ireland and Portugal, and congenital cardiovascular anomalies in Chile, United States, South Korea and Ireland (Table S5).

In 3 countries (Canada, South Korea and Portugal), a significant decrease in the mortality rate of children aged 5 to 9 (Table 2) was observed, driven by a significant decrease in deaths from leukaemia, pneumonia and respiratory pathologies, respectively (Table S6). In 4 countries (South Korea, Latvia, Lithuania and Portugal) there was a significant decrease in the mortality rate of children aged 10 to 14 (Table 2). For this age group, no specific condition contributed to this trend in a predominant way (Table S7).

## DISCUSSION

In this observational longitudinal study, we found a significant decline in childhood amenable mortality rates for the <1 age group in all 34 OECD countries between 2001/2005 and 2011/2015, and a slow decline in the other age groups. These results confirm the trend shown by previous studies



1  
2  
3 conducted on six OECD countries that were selected to provide a variety of forms of health care  
4 delivery between 1956 and 1980,[22] and these results highlight that policies to reduce amenable  
5 mortality rates are still needed, even in settings where the quality of medical services and resources  
6 is high.  
7  
8  
9

10  
11  
12 These results were affected by the fact that the only cause of death that was significantly reduced was  
13 conditions originating in the early neonatal period in the <1-year class. Surprisingly, the decline was  
14 not more pronounced among countries with higher mortality in 2001, indicating that continued gains  
15 occurred both in low-mortality and high-mortality countries. The most representative countries were  
16 Japan and Finland, which showed a remarkable improvement in their performance, despite starting  
17 from low values in 2001/2005, and countries such as Hungary and the US, which showed high  
18 amenable mortality rates in 2001/2005.  
19  
20  
21  
22  
23  
24  
25  
26  
27

28 The strong decline in the amenable rate for conditions originating in the early neonatal period suggests  
29 that substantial progress has been made in the improvement of timely and effective healthcare, on  
30 those factors that the literature considers important for amenable mortality and referring to a national  
31 policy on providing access to healthcare services[23] and cooperation between healthcare  
32 professionals, on the implementation of a perinatal audit[24] or the presence and content of clinical  
33 practice guidelines for antenatal and perinatal care, and/or on barriers to the adherence of these  
34 guidelines.[25] The 4 most representative countries mentioned above may again be taken as  
35 examples. In Japan, the marked decrease in amenable mortality to 54.2 since 2001 was likely achieved  
36 through improvements in access to medical care, permitting a significant decline in home births and  
37 an increase in the number of births in hospitals and/or clinics (hospital births). Prompt and appropriate  
38 medical care in cases of perinatal problems, guaranteed through the introduction of effective medical  
39 care and innovative treatments, appears to be another important factor contributing to improvements  
40 in outcomes for children.[26] A system organised by the level of the care that promises all children  
41 access to the appropriate level of the care may have improved the outcome in Finland,[27] so changes  
42 may also result from national programmes, such as the National Fetal and Infant Mortality Review  
43  
44  
45  
46  
47  
48  
49  
50  
51  
52  
53  
54  
55  
56  
57  
58  
59  
60

1  
2  
3 Program (NFIMR) in the US. The decrease of mortality in Hungary may be due to the introduction  
4 of evidence-based protocols on routine and essential new-born care to the hospital and trained  
5 delivery room and nursery staff members on the protocols.[28]  
6  
7

8  
9  
10 Our results on country-specific childhood amenable mortality rates showed that the reductions in the  
11 age classes' mortality rates were not evenly distributed across OECD countries. There was not a  
12 single cause for which the age classes' mortality rates declined in the countries studied, and the  
13 success in reducing mortality rates was not consistent for all causes. These achievements corroborate  
14 another of our results, highlighting that the causal distribution of the age classes' mortality rates did  
15 not vary over the period examined and that the conditions originating in the early neonatal period,  
16 namely, congenital cardiovascular anomalies, pneumonia, leukaemia, and all respiratory diseases  
17 (excl. pneumonia/influenza), are always positioned in high ranks. Because these are the main causes  
18 related to chronic disorders and pathologies that require acute care delivered quickly, our results  
19 suggest that the models of care for children must be revised. Wolf[29] highlights that the presence of  
20 children with chronic disorders requires substantial changes from a hospital-centric model to a model  
21 in which primary care and secondary care providers and public health services work closely together.  
22 Community-based delivery improves access and represents the first contact between patients and  
23 clinicians. Although an international debate is open on the best pattern of paediatric primary care  
24 among a paediatrician-based system, a combined system or a system based on GPs/FDs,[30] some  
25 authors highlight the importance of primary care paediatricians, especially to diagnose diseases such  
26 as cancer. Symptom interpretation is crucial because it influences the time interval from the first  
27 symptom presentation to diagnosis, but it can be difficult because the numbers are small and children  
28 with cancer present vague and non-specific symptoms.[31] Primary care paediatricians who look after  
29 children are likely to have more professional training and competencies than a general practitioner  
30 (GP).[29]  
31  
32  
33  
34  
35  
36  
37  
38  
39  
40  
41  
42  
43  
44  
45  
46  
47  
48  
49  
50  
51  
52  
53  
54  
55  
56

57  
58 The mortality rates for pneumonia were high for the <1-year age group, especially in 3 states: Poland,  
59 Slovakia and Chile. There may be several reasons for these high rates. In Chile, the healthcare system  
60

1  
2  
3 replicates class inequalities. Studies have identified and tracked several important inequalities in the  
4  
5 burden of infant mortality for infectious diseases by socioeconomic level in Chile, and they have  
6  
7 shown that this gap is discriminatory because disadvantaged households underutilise health care  
8  
9 services (due to social or economic exclusion).[32] The mortality trend for pneumonia in Poland  
10  
11 might be partly explained by differences in timely antimicrobial treatment together with the only  
12  
13 recommendation for the vaccines against invasive infections caused by *S. pneumonia*, which means  
14  
15 that they are not refunded by the Ministry of Health.[33] The Slovak social health insurance system  
16  
17 formally covers all residents and has a benefit package that all insurance companies must provide for  
18  
19 their insured. In theory, the insurance system is thus designed to provide everybody with the same  
20  
21 benefit package, regardless of their health status, ability to pay or place of residence. In practice,  
22  
23 coverage varies across the country, mainly because the supply of human resources is not adequate in  
24  
25 all regions and districts, and sometimes providers are simply not available. If providers are available,  
26  
27 they also tend to cluster in regional capitals. The Slovak Republic has one of the largest disparities in  
28  
29 doctor supply between urban and rural areas among EU countries. In addition, there are large  
30  
31 variations in the availability of specialists and GPs in each region. Deprived areas tend to have fewer  
32  
33 doctors and other health professionals, especially areas with a large Roma population, a group that  
34  
35 suffers from a poor health status and has limited access to care.[34]

36  
37  
38  
39  
40  
41  
42 Our study has the same limitations as all studies that use secondary data. It is undeniable that  
43  
44 international variations in birth registration laws and practices and the process of death certification  
45  
46 have the potential to bias the international comparisons of child mortality. Additionally, international  
47  
48 comparisons of mortality rates are confounded by the various ways in which countries classify  
49  
50 preterm infants near the threshold of viability.[35–37] Considering these issues, our study analyses  
51  
52 the trend of amenable mortality rates, and a comparison analysis was not performed.

53  
54  
55  
56 Although much of the literature assessing the contribution of health care to health focuses on mortality  
57  
58 data, data on children may be of limited value because the number of deaths is small, making  
59  
60

1  
2  
3 interpretation difficult. However, we believe that the problem of low numbers is mitigated by the fact  
4 that our study analysed the rates and trajectory of multiple countries over the 15-year time period.  
5

6  
7 Finally, our analysis did not account for mortality disparities within countries that were attributable  
8 to ethnicity, race or socioeconomic characteristics, geographic residence, or race/ethnicity since our  
9 data sources did not collect demographic or social information. Evidence from the US, for example,  
10 also showed higher levels of amenable mortality among people disadvantaged in terms of race or  
11 socioeconomic status.[38,39] Considering that the perinatal mortality of the US has a prevailing effect  
12 on premature births and that striking racial disparities persist, with African Americans exhibiting  
13 higher rates of preterm delivery than any other major racial/ethnic group,[40] potentially large  
14 variations within populations may be concealed.  
15

16  
17 Some preliminary conclusions can be drawn from this study. Over the 15-year period from 2001 to  
18 2015, the under-1-year-old amenable mortality rate progressively declined in 24 OECD countries.  
19 Second, OECD countries had success in reducing mortality from conditions originating in the early  
20 neonatal period. These are tremendous successes of the public health system.  
21

22  
23 Finally, the low decline in amenable mortality rates for children  $\geq 1$  year, the variance in amenable  
24 mortality rates across countries and the insufficient success in reducing mortality from all causes  
25 suggest that the health system must increase its efforts to improve health outcomes for children.  
26  
27  
28  
29  
30  
31  
32  
33  
34  
35  
36  
37  
38  
39  
40  
41  
42  
43  
44

## 45 **DECLARATIONS**

### 46 **Ethics approval and consent to participate**

47 Not applicable  
48

### 49 **Availability of data and materials**

50  
51 The datasets used and/or analysed during the current study are available from the corresponding  
52 author on reasonable request.  
53  
54

### 55 **Competing interests**

56  
57 The authors declare that they have no competing interests.  
58  
59  
60

## Funding

This research received no specific grant from any funding agency in the public, commercial or not-for-profit sectors.

## Acknowledgements

Not applicable.

## Author Contributions

MMG and GD formulated the research goals and supervised the research activity; MMG, GD, JL defined the design of the methodology; MMG wrote the article; RS, WR and MPF revised the article; MB collected the data and managed the database; JL utilised statistical techniques to analyse the study data.

All authors have read and approved the manuscript.

## REFERENCES

- 1 Blum RW, Nelson-Mmari K. The health of young people in a global context. *J Adolesc Health Off Publ Soc Adolesc Med* 2004;**35**:402–18. doi:10.1016/j.jadohealth.2003.10.007
- 2 WHO. Children: reducing mortality. <http://www.who.int/news-room/fact-sheets/detail/children-reducing-mortality> (accessed 3 Oct 2018).
- 3 Fraser J, Sidebotham P, Frederick J, *et al*. Learning from child death review in the USA, England, Australia, and New Zealand. *Lancet Lond Engl* 2014;**384**:894–903. doi:10.1016/S0140-6736(13)61089-2
- 4 Kyu HH, Stein CE, Pinto CB, *et al*. Causes of death among children aged 5–14 years in the WHO European Region: a systematic analysis for the Global Burden of Disease Study 2016. *Lancet Child Adolesc Health* 2018;**2**:321–37. doi:10.1016/S2352-4642(18)30095-6
- 5 Sidebotham P, Fraser J, Covington T, *et al*. Understanding why children die in high-income countries. *The Lancet* 2014;**384**:915–27. doi:10.1016/S0140-6736(14)60581-X

- 1  
2  
3 6 Alio AP, Richman AR, Clayton HB, *et al.* An ecological approach to understanding black-white  
4 disparities in perinatal mortality. *Matern Child Health J* 2010;**14**:557–66. doi:10.1007/s10995-  
5  
6 009-0495-9  
7  
8  
9  
10 7 Gakidou E, Cowling K, Lozano R, *et al.* Increased educational attainment and its effect on child  
11 mortality in 175 countries between 1970 and 2009: a systematic analysis. *Lancet Lond Engl*  
12 2010;**376**:959–74. doi:10.1016/S0140-6736(10)61257-3  
13  
14  
15  
16 8 Lightfoot TJ, Johnston WT, Simpson J, *et al.* Survival from childhood acute lymphoblastic  
17 leukaemia: the impact of social inequality in the United Kingdom. *Eur J Cancer* 2012;**48**:263–9.  
18 doi:10.1016/j.ejca.2011.10.007  
19  
20  
21  
22  
23 9 Gore FM, Bloem PJN, Patton GC, *et al.* Global burden of disease in young people aged 10-24  
24 years: a systematic analysis. *Lancet Lond Engl* 2011;**377**:2093–102. doi:10.1016/S0140-  
25  
26 6736(11)60512-6  
27  
28  
29  
30 10 Lavergne MR, McGrail K. What, If Anything, Does Amenable Mortality Tell Us about Regional  
31 Health System Performance? *Healthc Policy* 2013;**8**:79-90a.  
32  
33  
34  
35 11 Office for National Statistics. *Definitions of avoidable mortality*. London: ONS: 2011.  
36 [http://www.networks.nhs.uk/nhs-networks/east-of-england-respiratory-programme/news/ons-](http://www.networks.nhs.uk/nhs-networks/east-of-england-respiratory-programme/news/ons-consultation-on-avoidable-mortality-closes-12-april)  
37 [consultation-on-avoidable-mortality-closes-12-april.](http://www.networks.nhs.uk/nhs-networks/east-of-england-respiratory-programme/news/ons-consultation-on-avoidable-mortality-closes-12-april)  
38  
39  
40  
41  
42 12 Rutstein DD, Berenberg W, Chalmers TC, *et al.* Measuring the quality of medical care. A clinical  
43 method. *N Engl J Med* 1976;**294**:582–8. doi:10.1056/NEJM197603112941104  
44  
45  
46  
47 13 Department of Health. The NHS Outcomes Framework 2011/12.  
48 2010. [https://assets.publishing.service.gov.uk/government/uploads/system/uploads/attachment\\_d](https://assets.publishing.service.gov.uk/government/uploads/system/uploads/attachment_data/file/213789/dh_123138.pdf)  
49 [ata/file/213789/dh\\_123138.pdf](https://assets.publishing.service.gov.uk/government/uploads/system/uploads/attachment_data/file/213789/dh_123138.pdf)  
50  
51  
52  
53 14 Gay JG, Paris V, Devaux M, *et al.* Mortality Amenable to Health Care in 31 OECD Countries:  
54 estimates and methodological Issues. Published Online First: 31 January 2011.  
55 doi:<https://doi.org/10.1787/5kgj35f9f8s2-en>  
56  
57  
58  
59  
60

1  
2  
3  
4  
5  
6  
7  
8  
9  
10  
11  
12  
13  
14  
15  
16  
17  
18  
19  
20  
21  
22  
23  
24  
25  
26  
27  
28  
29  
30  
31  
32  
33  
34  
35  
36  
37  
38  
39  
40  
41  
42  
43  
44  
45  
46  
47  
48  
49  
50  
51  
52  
53  
54  
55  
56  
57  
58  
59  
60

- 15 Nolte E, McKee CM. Measuring the health of nations: updating an earlier analysis. *Health Aff Proj Hope* 2008;**27**:58–71. doi:10.1377/hlthaff.27.1.58
- 16 World Bank. World Development Indicators | DataBank. 2018. <http://databank.worldbank.org/data/reports.aspx?source=world-development-indicators> (accessed 3 Oct 2018).
- 17 World Health Organization. WHO Mortality Database. 2018. [http://www.who.int/healthinfo/mortality\\_data/en/](http://www.who.int/healthinfo/mortality_data/en/) (accessed 3 Oct 2018).
- 18 United Nations. Demographic Statistics Database. 2018. <http://data.un.org/Data.aspx?d=POP&f=tableCode%3A22> (accessed 3 Oct 2018).
- 19 Nolte E, McKee M. *Does health care save lives? Avoidable mortality revisited*. The Nuffield Trust 2004. <http://researchonline.lshtm.ac.uk/15535/> (accessed 3 Oct 2018).
- 20 Eurostat. Amenable and preventable deaths of residents. [https://ec.europa.eu/eurostat/web/products-datasets/-/hlth\\_cd\\_apr](https://ec.europa.eu/eurostat/web/products-datasets/-/hlth_cd_apr) (accessed 3 Oct 2018).
- 21 Hildebrandt M, Bender R, Gehrman U, *et al*. Calculating confidence intervals for impact numbers. *BMC Med Res Methodol* 2006;**6**:32. doi:10.1186/1471-2288-6-32
- 22 Charlton JR, Velez R. Some international comparisons of mortality amenable to medical intervention. *Br Med J Clin Res Ed* 1986;**292**:295–301.
- 23 Kamarudeen S. Amenable mortality as an indicator of healthcare quality - a literature review. *Health Stat Q* 2010;:66–80. doi:10.1057/hsq.2010.16
- 24 de Jonge A, Baron R, Westerneng M, *et al*. Perinatal mortality rate in the Netherlands compared to other European countries: a secondary analysis of Euro-PERISTAT data. *Midwifery* 2013;**29**:1011–8. doi:10.1016/j.midw.2013.02.005
- 25 Richardus JH, Graafmans WC, Verloove-Vanhorick SP, *et al*. Differences in perinatal mortality and suboptimal care between 10 European regions: results of an international audit. *BJOG Int J Obstet Gynaecol* 2003;**110**:97–105.

- 1  
2  
3 26 Maeda K. Progress of Perinatal Medicine in Japan. *J Health Med Inform* 2013;**s11**.  
4  
5 doi:10.4172/2157-7420.S11-002  
6  
7  
8 27 Viisainen K, Gissler M, Hemminki E. Birth outcomes by level of obstetric care in Finland: a  
9  
10 catchment area based analysis. *J Epidemiol Community Health* 1994;**48**:400–5.  
11  
12 doi:10.1136/jech.48.4.400  
13  
14  
15 28 Kuchna D, Hovsepyan A, Leonard S. Preventing Newborn Deaths In Romania And Hungary.  
16  
17 *Health Aff (Millwood)* 2017;**36**:1160–1160. doi:10.1377/hlthaff.2017.0382  
18  
19  
20 29 Wolfe I, Thompson M, Gill P, *et al*. Health services for children in western Europe. *Lancet Lond*  
21  
22 *Engl* 2013;**381**:1224–34. doi:10.1016/S0140-6736(12)62085-6  
23  
24  
25 30 Katz M, Rubino A, Collier J, *et al*. Demography of pediatric primary care in Europe: delivery of  
26  
27 care and training. *Pediatrics* 2002;**109**:788–96.  
28  
29  
30 31 Feltbower RG, Lewis IJ, Picton S, *et al*. Diagnosing childhood cancer in primary care – a realistic  
31  
32 expectation? *Br J Cancer* 2004;**90**:1882–4. doi:10.1038/sj.bjc.6601733  
33  
34  
35 32 Hertel-Fernandez AW, Giusti AE, Sotelo JM. The Chilean infant mortality decline: improvement  
36  
37 for whom? Socioeconomic and geographic inequalities in infant mortality, 1990-2005. *Bull*  
38  
39 *World Health Organ* 2007;**85**:798–804.  
40  
41  
42 33 Gajewska M, Lewtak K, Scheres J, *et al*. Trends in Hospitalization of Children with Bacterial  
43  
44 Pneumonia in Poland. *Cent Eur J Public Health* 2016;**24**:188–92. doi:10.21101/cejph.a4164  
45  
46  
47 34 OECD. State of Health in the EU Slovak Republic: Country Health Profile 2017 - European  
48  
49 Observatory on Health Systems and Policies. 2017.  
50  
51  
52 35 Kramer MS, Platt RW, Yang H, *et al*. Registration artifacts in international comparisons of infant  
53  
54 mortality. *Paediatr Perinat Epidemiol* 2002;**16**:16–22. doi:10.1046/j.1365-3016.2002.00390.x  
55  
56  
57 36 Joseph KS, Liu S, Rouleau J, *et al*. Influence of definition based versus pragmatic birth  
58  
59 registration on international comparisons of perinatal and infant mortality: population based  
60  
retrospective study. *The BMJ* 2012;**344**. doi:10.1136/bmj.e746



1  
2  
3  
4  
5  
6  
7  
8  
9  
10  
11  
12  
13  
14  
15  
16  
17  
18  
19  
20  
21  
22  
23  
24  
25  
26  
27  
28  
29  
30  
31  
32  
33  
34  
35  
36  
37  
38  
39  
40  
41  
42  
43  
44  
45  
46  
47  
48  
49  
50  
51  
52  
53  
54  
55  
56  
57  
58  
59  
60

- 37 Mohangoo AD, Blondel B, Gissler M, *et al.* International Comparisons of Fetal and Neonatal Mortality Rates in High-Income Countries: Should Exclusion Thresholds Be Based on Birth Weight or Gestational Age? *PLOS ONE* 2013;**8**:e64869. doi:10.1371/journal.pone.0064869
- 38 Schwartz E, Kofie VY, Rivo M, *et al.* Black/white comparisons of deaths preventable by medical intervention: United States and the District of Columbia 1980-1986. *Int J Epidemiol* 1990;**19**:591–8. doi:10.1093/ije/19.3.591
- 39 Macinko J, Elo IT. Black–white differences in avoidable mortality in the USA, 1980–2005. *J Epidemiol Community Health* 2009;**63**:715–21. doi:10.1136/jech.2008.081141
- 40 Riddell CA, Harper S, Kaufman JS. Trends in Differences in US Mortality Rates Between Black and White Infants. *JAMA Pediatr* 2017;**171**:911–3. doi:10.1001/jamapediatrics.2017.1365

## WHAT IS ALREADY KNOWN ON THIS SUBJECT

Many different factors contributing to child and adolescent mortality have been studied, including: biological and psychosocial factors, such as sex, race, ethnic origin or disability, socioeconomic status, engagement in behaviours such as smoking, alcohol misuse, drug misuse, poor diet, and physical activity during adolescence and the physical environment. Whereas the mortality burden is conditioned by the performance of the health care system has not been well investigated.

## WHAT THIS STUDY ADDS

Over the 15-year period from 2001 to 2015, the under-1-year-old amenable mortality rate progressively declined in 24 OECD countries. OECD countries had success in reducing mortality from conditions originating in the early neonatal period. These are tremendous successes of the public health system. The low decline in amenable mortality rates for children  $\geq 1$  year, the variance in amenable mortality rates across countries and the insufficient success in reducing mortality from all causes suggest that the health system must increase its efforts to improve health outcomes for children.

**Table S1.** Data Availability for the 34 OECD Countries (0 “Not Available”/1 “Available”).

| Country                   | Year      |           |           |           |           |           |           |           |           |           |           |           |           |           |           | Total      |
|---------------------------|-----------|-----------|-----------|-----------|-----------|-----------|-----------|-----------|-----------|-----------|-----------|-----------|-----------|-----------|-----------|------------|
|                           | 2001      | 2002      | 2003      | 2004      | 2005      | 2006      | 2007      | 2008      | 2009      | 2010      | 2011      | 2012      | 2013      | 2014      | 2015      |            |
| Canada                    | 1         | 1         | 1         | 1         | 1         | 1         | 1         | 1         | 1         | 1         | 1         | 1         | 1         | 0         | 0         | 13         |
| Chile                     | 1         | 1         | 1         | 1         | 1         | 1         | 1         | 1         | 1         | 1         | 1         | 1         | 1         | 1         | 1         | 15         |
| United States of America  | 1         | 1         | 1         | 1         | 1         | 1         | 1         | 1         | 1         | 1         | 0         | 1         | 0         | 0         | 1         | 12         |
| Israel                    | 1         | 1         | 1         | 1         | 1         | 1         | 1         | 1         | 1         | 1         | 1         | 1         | 1         | 1         | 1         | 15         |
| Japan                     | 1         | 1         | 1         | 1         | 1         | 1         | 1         | 1         | 1         | 1         | 1         | 1         | 1         | 1         | 1         | 15         |
| Republic of Korea         | 1         | 1         | 1         | 1         | 1         | 1         | 1         | 1         | 1         | 1         | 1         | 1         | 1         | 1         | 1         | 15         |
| Austria                   | 1         | 1         | 1         | 1         | 1         | 1         | 1         | 1         | 1         | 1         | 1         | 1         | 1         | 1         | 1         | 15         |
| Belgium                   | 1         | 1         | 1         | 1         | 1         | 1         | 1         | 1         | 1         | 1         | 1         | 1         | 1         | 1         | 1         | 15         |
| Czech Republic            | 1         | 1         | 1         | 1         | 1         | 1         | 1         | 1         | 1         | 1         | 1         | 1         | 1         | 1         | 1         | 15         |
| Denmark                   | 1         | 1         | 1         | 1         | 1         | 1         | 1         | 1         | 1         | 1         | 1         | 1         | 1         | 1         | 1         | 15         |
| Estonia                   | 1         | 1         | 1         | 1         | 1         | 1         | 1         | 1         | 1         | 1         | 1         | 1         | 1         | 1         | 1         | 15         |
| Finland                   | 1         | 1         | 1         | 1         | 1         | 1         | 1         | 1         | 1         | 1         | 1         | 1         | 1         | 1         | 1         | 15         |
| France                    | 1         | 1         | 1         | 1         | 1         | 1         | 1         | 1         | 1         | 1         | 1         | 1         | 1         | 1         | 0         | 14         |
| Germany                   | 1         | 1         | 1         | 1         | 1         | 1         | 1         | 1         | 1         | 1         | 1         | 1         | 1         | 1         | 1         | 15         |
| Greece                    | 1         | 1         | 1         | 1         | 1         | 1         | 1         | 1         | 1         | 1         | 1         | 1         | 1         | 1         | 1         | 15         |
| Hungary                   | 1         | 1         | 1         | 1         | 1         | 1         | 1         | 1         | 1         | 1         | 1         | 1         | 1         | 1         | 1         | 15         |
| Iceland                   | 1         | 1         | 1         | 1         | 1         | 1         | 1         | 1         | 1         | 1         | 1         | 1         | 1         | 1         | 1         | 15         |
| Ireland                   | 1         | 1         | 1         | 1         | 1         | 1         | 1         | 1         | 1         | 1         | 1         | 1         | 1         | 1         | 0         | 14         |
| Italy                     | 1         | 1         | 1         | 1         | 1         | 1         | 1         | 1         | 1         | 1         | 1         | 1         | 1         | 1         | 1         | 15         |
| Latvia                    | 1         | 1         | 1         | 1         | 1         | 1         | 1         | 1         | 1         | 1         | 1         | 1         | 1         | 1         | 1         | 15         |
| Lithuania                 | 1         | 1         | 1         | 1         | 1         | 1         | 1         | 1         | 1         | 1         | 1         | 1         | 1         | 1         | 1         | 15         |
| Luxembourg                | 1         | 1         | 1         | 1         | 1         | 1         | 1         | 1         | 1         | 1         | 1         | 1         | 1         | 1         | 1         | 15         |
| Netherlands               | 1         | 1         | 1         | 1         | 1         | 1         | 1         | 1         | 1         | 1         | 1         | 1         | 1         | 1         | 1         | 15         |
| Norway                    | 1         | 1         | 1         | 1         | 1         | 1         | 1         | 1         | 1         | 1         | 1         | 1         | 1         | 1         | 1         | 15         |
| Poland                    | 1         | 1         | 1         | 1         | 1         | 1         | 1         | 1         | 1         | 1         | 1         | 1         | 1         | 1         | 1         | 15         |
| Portugal                  | 1         | 1         | 1         | 0         | 0         | 0         | 1         | 1         | 1         | 1         | 1         | 1         | 1         | 1         | 0         | 11         |
| Slovakia                  | 1         | 1         | 1         | 1         | 1         | 1         | 1         | 1         | 1         | 1         | 0         | 1         | 1         | 1         | 0         | 13         |
| Slovenia                  | 1         | 1         | 1         | 1         | 1         | 1         | 1         | 1         | 1         | 1         | 1         | 1         | 1         | 1         | 1         | 15         |
| Spain                     | 1         | 1         | 1         | 1         | 1         | 1         | 1         | 1         | 1         | 1         | 1         | 1         | 1         | 1         | 1         | 15         |
| Sweden                    | 1         | 1         | 1         | 1         | 1         | 1         | 1         | 1         | 1         | 1         | 1         | 1         | 1         | 1         | 1         | 15         |
| Switzerland               | 1         | 1         | 1         | 1         | 1         | 1         | 1         | 1         | 1         | 1         | 1         | 1         | 1         | 1         | 1         | 15         |
| United Kingdom            | 1         | 1         | 1         | 1         | 1         | 1         | 1         | 1         | 1         | 1         | 1         | 1         | 1         | 1         | 1         | 15         |
| Australia                 | 1         | 1         | 1         | 1         | 0         | 1         | 1         | 1         | 1         | 1         | 1         | 1         | 1         | 1         | 1         | 14         |
| New Zealand               | 1         | 1         | 1         | 1         | 1         | 1         | 1         | 1         | 1         | 1         | 1         | 1         | 1         | 0         | 0         | 13         |
| <i>All OECD countries</i> | <i>34</i> | <i>34</i> | <i>34</i> | <i>33</i> | <i>32</i> | <i>33</i> | <i>34</i> | <i>34</i> | <i>34</i> | <i>34</i> | <i>32</i> | <i>34</i> | <i>33</i> | <i>31</i> | <i>28</i> | <i>494</i> |

Notes: Causes of death are coded according to the ICD-9 (Austria 2001; Greece 2001/2013; Ireland 2001/2006; Italy 2001/2002; Portugal 2001) or ICD-10 (all other country-years). Reference populations for some country-years were retrieved from UNdata if not available in the WHO Mortality Database (Canada 2006/2013; Chile 2001/2015; United States of America 2008/2010, 2012, 2015; Finland 2015; Ireland 2010, 2014; Switzerland 2014/2015).

Table S2. Nolte and McKee's list of causes of death considered amenable to health care.

| Disease category                              | Age  | Diseases                                                   | ICD-9 codes     | ICD-10 codes        |
|-----------------------------------------------|------|------------------------------------------------------------|-----------------|---------------------|
| Infectious diseases                           | 0-74 | Tuberculosis                                               | 010-8, 137      | A15-9, B90          |
|                                               | 0-74 | Septicemia                                                 | 038             | A40-1               |
|                                               | 0-74 | Pneumonia                                                  | 480-6           | J12-8               |
|                                               | 0-74 | Influenza                                                  | 487             | J10-1               |
|                                               | 0-14 | Intestinal infections (other than typhoid, diphtheria)     | 001-9           | A00-9               |
|                                               | 0-74 | Diphtheria, Tetanus, Poliomyelitis                         | 032, 037, 045   | A35-6, A80          |
|                                               | 0-14 | Whooping cough                                             | 033             | A37                 |
|                                               | 1-14 | Measles                                                    | 055             | B05                 |
| Cancers                                       | 0-74 | Colorectal cancer                                          | 153-4           | C18-21              |
|                                               | 0-74 | Malignant neoplasm of skin                                 | 173             | C44                 |
|                                               | 0-74 | Breast cancer                                              | 174             | C50                 |
|                                               | 0-44 | Cervical cancer and uterine cancer                         | 179, 180, 182   | C53-5               |
|                                               | 0-74 | Neoplasm of the testis                                     | 186             | C62                 |
|                                               | 0-74 | Hodgkin's disease                                          | 201             | C81                 |
|                                               | 0-44 | Leukemia                                                   | 204-8           | C91-5               |
| Endocrine, nutritional and metabolic diseases | 0-74 | Thyroid disorders                                          | 240-6           | E00-7               |
|                                               | 0-49 | Diabetes mellitus                                          | 250             | E10-4               |
| Diseases of the nervous system                | 0-74 | Epilepsy                                                   | 345             | G40-1               |
| Diseases of the circulatory system            | 0-74 | Rheumatic heart diseases                                   | 393-8           | I05-9               |
|                                               | 0-74 | Ischemic heart diseases: 50% of deaths                     | 410-4           | I20-5               |
|                                               | 0-74 | Cerebrovascular diseases                                   | 430-8           | I60-9               |
|                                               | 0-74 | Hypertensive diseases                                      | 401-5           | I10-3, I15          |
| Diseases of the genitourinary system          | 0-74 | Nephritis and nephrosis                                    | 580-9           | N00-7, N17-9, N25-7 |
|                                               | 0-74 | Benign prostatic hyperplasia                               | 600             | N40                 |
| Diseases of the respiratory system            | 1-14 | All respiratory diseases (excl. pneumonia/influenza)       | 460-79, 488-519 | J00-9, J20-99       |
| Diseases of the digestive system              | 0-74 | Peptic ulcer                                               | 531-3           | K25-7               |
|                                               | 0-74 | Appendicitis                                               | 540-3           | K35-8               |
|                                               | 0-74 | Abdominal hernia                                           | 550-3           | K40-6               |
|                                               | 0-74 | Cholelithiasis and cholecystitis                           | 574-5           | K80-1               |
| Perinatal mortality                           | 0-74 | Maternal deaths                                            | 630-76          | O00-99              |
|                                               | 0-74 | Conditions originating in the early neonatal period        | 760-79          | P00-96              |
|                                               | 0-74 | Congenital cardiovascular anomalies                        | 745-7           | Q20-8               |
| External causes                               | 0-74 | Misadventures to patients during surgical and medical care | E870-6, E878-9  | Y60-9, Y83-4        |

Source: Nolte and McKee 2008; Gay et al. 2011.

**S3. Yearly Amenable Mortality rates (Per 100,000) of Conditions originating in early neonatal period for Age <1 in 34 OECD Countries, 2001/2005, 2006/2010 and 2011/2015**

| Country                   | Rate 2001/2005       | Rate 2006/2010       | Rate 2011/2015       | % Change 2006/10 – 2001/05    | % Change 2011/15 – 2006/10    |
|---------------------------|----------------------|----------------------|----------------------|-------------------------------|-------------------------------|
| Canada                    | 293.1 (285, 301.5)   | 297.1 (289.2, 305.1) | 290.8 (280.9, 301)   | 1.3 (-7.4, 10.1)              | -2.1 (-10.3, 6.1)             |
| Chile                     | 329.3 (319.2, 339.7) | 341.9 (331.7, 352.3) | 324.2 (314.3, 334.4) | 3.8 (-6.2, 13.8)              | -5.2 (-14.3, 3.9)             |
| United States of America  | 349.6 (347, 352.2)   | 322.1 (319.7, 324.5) | 295.6 (291.9, 299.5) | <b>-7.9 (-10, -5.7) *</b>     | <b>-8.2 (-10.5, -5.9) *</b>   |
| Israel                    | 229.6 (218.5, 241.1) | 174.4 (165.2, 184)   | 142.4 (134.6, 150.7) | <b>-24 (-36.3, -11.7) *</b>   | <b>-18.3 (-32.5, -4.2) *</b>  |
| Japan                     | 83.6 (81.2, 86)      | 68.1 (65.9, 70.3)    | 54.2 (52.2, 56.2)    | <b>-18.5 (-26.4, -10.7) *</b> | <b>-20.4 (-29.2, -11.6) *</b> |
| Republic of Korea         | 262 (255.6, 268.5)   | 186.9 (181.2, 192.7) | 160.1 (154.9, 165.5) | <b>-28.7 (-34.9, -22.4) *</b> | <b>-14.3 (-22.9, -5.7) *</b>  |
| Austria                   | 250.9 (235.3, 267.2) | 203.5 (189.5, 218.3) | 162.4 (150.1, 175.5) | <b>-18.9 (-36, -1.8) *</b>    | <b>-20.2 (-38.8, -1.6) *</b>  |
| Belgium                   | 193.2 (182, 205)     | 182.4 (172, 193.4)   | 162.9 (153.1, 173.2) | -5.6 (-23.1, 11.9)            | -10.7 (-27.5, 6.1)            |
| Czech Republic            | 209.9 (197, 223.4)   | 167 (156.6, 178)     | 136 (126.4, 146.1)   | <b>-20.4 (-36.3, -4.6) *</b>  | <b>-18.6 (-36, -1.1) *</b>    |
| Denmark                   | 231.3 (215, 248.5)   | 160.1 (146.6, 174.6) | 190.5 (174.9, 207)   | -30.8 (-48.1, -13.4) *        | 18.9 (-12.9, 50.8)            |
| Estonia                   | 290.7 (251.3, 334.7) | 188.6 (159.2, 221.8) | 109.8 (86.8, 137.1)  | <b>-35.1 (-66.2, -4) *</b>    | <b>-41.8 (-77.5, -6) *</b>    |
| Finland                   | 142 (128.4, 156.6)   | 117.4 (105.4, 130.4) | 84.4 (74.2, 95.5)    | -17.3 (-43.8, 9.2)            | 28.2 (-54.3, -2.1) *          |
| France                    | 190.6 (186.2, 195)   | 175.2 (171, 179.4)   | 177.1 (172.4, 181.9) | -8.1 (-14.9, -1.3) *          | 1.1 (-6.5, 8.7)               |
| Germany                   | 195 (190.4, 199.6)   | 182.5 (178, 187.1)   | 170.3 (166, 174.7)   | -6.4 (-13.5, 8)               | -6.7 (-14.1, 8)               |
| Greece                    | 209 (196.8, 221.9)   | 155.4 (145.3, 165.9) | 164.9 (153.7, 176.6) | -25.7 (-40.4, -10.9) *        | 6.1 (-16.4, 28.7)             |
| Hungary                   | 432.5 (414, 451.7)   | 334.2 (318, 350.9)   | 278.4 (263.1, 294.2) | <b>-22.7 (-34, -11.5) *</b>   | <b>-16.7 (-30.5, -2.9) *</b>  |
| Iceland                   | 119.9 (77.5, 176.9)  | 102 (65.3, 151.8)    | 67.5 (37.8, 111.3)   | -14.9 (-121.4, 85.1)          | -33.8 (-129.2, 61.6)          |
| Ireland                   | 189.8 (174.4, 206.3) | 154 (141.3, 167.7)   | 145.1 (131.5, 159.7) | -18.9 (-40.4, 2.7)            | -5.8 (-31.2, 19.6)            |
| Italy                     | 232.6 (226.9, 238.4) | 203.1 (197.8, 208.4) | 177.9 (172.7, 183.1) | <b>-12.7 (-19.7, -5.7) *</b>  | <b>-12.4 (-20, -4.8) *</b>    |
| Latvia                    | 408.7 (370.3, 450)   | 348.6 (314.9, 384.9) | 270.5 (239.3, 304.6) | -14.7 (-41, 11.6)             | -22.4 (-49.2, 4.4)            |
| Lithuania                 | 261.4 (236.2, 288.5) | 235.8 (212, 261.6)   | 162.6 (143, 184.2)   | -9.8 (-38.6, 19.1)            | -31.1 (-56, -6.1) *           |
| Luxembourg                | 203.1 (152.6, 265.1) | 104.2 (69.8, 149.7)  | 113.3 (78.5, 158.4)  | -48.7 (-100.4, 3)             | 8.7 (-111.7, 108.7)           |
| Netherlands               | 249.5 (239.8, 259.5) | 211.4 (202.1, 221)   | 199.9 (190.6, 209.5) | -15.3 (-26.5, -4.1) *         | -5.4 (-19.1, 8.2)             |
| Norway                    | 166.1 (151.5, 181.8) | 158.6 (144.7, 173.6) | 123.9 (111.6, 137.2) | -4.5 (-31.7, 22.7)            | -21.9 (-45.6, 1.8)            |
| Poland                    | 360.4 (351.7, 369.3) | 306.1 (298.4, 313.9) | 232.3 (225.4, 239.3) | <b>-15.1 (-21.7, -8.4) *</b>  | <b>-24.1 (-30.7, -17.5) *</b> |
| Portugal                  | 233.6 (217.6, 250.4) | 179.5 (166.7, 193)   | 181.2 (167.5, 195.6) | -23.2 (-37.6, -8.7) *         | .9 (-20.4, 22.3)              |
| Slovakia                  | 301.7 (281, 323.6)   | 256.6 (238.2, 275.9) | 240.2 (217.4, 264.7) | -15 (-34.1, 4.2)              | -6.4 (-28.3, 15.5)            |
| Slovenia                  | 203.7 (175, 235.7)   | 168.8 (144.7, 195.9) | 122.3 (102.3, 145.1) | -17.1 (-55.7, 21.5)           | -27.6 (-64.2, 9.1)            |
| Spain                     | 209.6 (203.5, 215.8) | 181.7 (176.4, 187.1) | 166.7 (161.4, 172.1) | -13.3 (-21.4, -5.3) *         | -8.2 (-17.2, .7)              |
| Sweden                    | 142.5 (132.1, 153.6) | 103.8 (95.4, 112.7)  | 109.4 (101, 118.3)   | -27.2 (-45.3, -9.1) *         | 5.4 (-21.4, 32.2)             |
| Switzerland               | 217.4 (202.5, 233.1) | 233.3 (218.2, 249.3) | 207.7 (193.9, 222.3) | 7.3 (-15.7, 30.4)             | -11 (-29.8, 7.8)              |
| United Kingdom            | 289.4 (283.8, 295.2) | 256.5 (251.5, 261.6) | 214.1 (209.6, 218.7) | <b>-11.4 (-16.9, -5.9) *</b>  | <b>-16.6 (-22, -11.2) *</b>   |
| Australia                 | 244 (234.5, 253.9)   | 218 (210.4, 225.9)   | 180.6 (173.9, 187.5) | <b>-10.7 (-20.6, -7) *</b>    | <b>-17.2 (-26.7, -7.6) *</b>  |
| New Zealand               | 255.5 (237.2, 274.9) | 225.8 (209.4, 243.1) | 242.9 (220.9, 266.6) | -11.6 (-32.2, 8.9)            | 7.6 (-17.2, 32.4)             |
| <i>All OECD countries</i> | 266.3 (264.9, 267.6) | 239.8 (238.6, 241.1) | 193.8 (192.5, 195.1) | <b>-9.9 (-18.4, -1.5) *</b>   | <b>-19.2 (-27.9, -10.4) *</b> |

**Table S4. Percentage Distribution of Causes of Death Amenable to Healthcare for Age <1 Year in 34 OECD Countries, Years 2011/2015.**

| Cause of Death                                                  | Country |      |      |      |      |      |      |      |      |      |      |      |      |      |      |      |      |      |      |      |      |      |      |      |      |      |      |      |      |      |      |      |      |      |     |
|-----------------------------------------------------------------|---------|------|------|------|------|------|------|------|------|------|------|------|------|------|------|------|------|------|------|------|------|------|------|------|------|------|------|------|------|------|------|------|------|------|-----|
|                                                                 | CA      | CL   | US   | IL   | JP   | KR   | AT   | BE   | CZ   | DK   | EE   | FI   | FR   | DE   | GR   | HU   | IS   | IE   | IT   | LV   | LT   | LU   | NL   | NO   | PL   | PT   | SK   | SI   | ES   | SE   | CH   | GB   | AU   | NZ   |     |
| Tuberculosis                                                    | 0.0     | 0.0  | 0.0  | 0.0  | 0.0  | 0.0  | 0.0  | 0.0  | 0.0  | 0.0  | 0.0  | 0.0  | 0.0  | 0.0  | 0.0  | 0.0  | 0.0  | 0.0  | 0.0  | 0.0  | 0.0  | 0.0  | 0.0  | 0.0  | 0.0  | 0.0  | 0.0  | 0.0  | 0.0  | 0.0  | 0.0  | 0.0  | 0.0  | 0.0  | 0.0 |
| Septicemia                                                      | 0.6     | 0.4  | 1.3  | 1.4  | 4.3  | 0.4  | 0.1  | 0.8  | 1.1  | 0.0  | 0.0  | 0.9  | 0.5  | 0.6  | 2.2  | 0.1  | 5.3  | 0.8  | 1.6  | 0.3  | 1.8  | 0.0  | 0.5  | 0.4  | 0.8  | 0.9  | 0.5  | 0.0  | 0.6  | 2.1  | 0.0  | 0.6  | 0.7  | 0.9  |     |
| Pneumonia                                                       | 0.5     | 2.7  | 1.1  | 0.9  | 3.6  | 0.7  | 0.6  | 0.7  | 2.7  | 0.8  | 2.0  | 0.9  | 0.1  | 0.5  | 4.0  | 1.0  | 0.0  | 0.0  | 0.5  | 1.5  | 3.8  | 0.0  | 0.2  | 0.9  | 3.7  | 0.6  | 8.9  | 2.6  | 0.4  | 2.4  | 0.7  | 1.0  | 1.0  | 3.7  |     |
| Influenza                                                       | 0.1     | 0.1  | 0.1  | 0.0  | 0.1  | 0.0  | 0.1  | 0.2  | 0.2  | 0.0  | 0.0  | 0.3  | 0.1  | 0.0  | 0.1  | 0.1  | 0.0  | 0.0  | 0.0  | 0.3  | 0.3  | 0.0  | 0.1  | 0.0  | 0.1  | 0.0  | 0.0  | 0.0  | 0.1  | 0.0  | 0.1  | 0.0  | 0.1  | 0.0  |     |
| Intestinal infections other than typhoid, diphtheria (0–14 yrs) | 0.3     | 0.1  | 1.7  | 1.3  | 1.3  | 0.5  | 0.4  | 0.1  | 0.8  | 0.0  | 0.0  | 0.0  | 0.5  | 0.3  | 0.0  | 0.3  | 0.0  | 0.2  | 0.3  | 0.0  | 0.3  | 0.0  | 0.3  | 0.2  | 0.1  | 0.0  | 0.5  | 0.0  | 0.3  | 0.3  | 0.0  | 0.3  | 0.4  | 0.7  |     |
| Diphtheria, Tetanus, Poliomyelitis                              | 0.0     | 0.0  | 0.0  | 0.0  | 0.0  | 0.0  | 0.0  | 0.0  | 0.0  | 0.0  | 0.0  | 0.0  | 0.0  | 0.0  | 0.0  | 0.0  | 0.0  | 0.0  | 0.0  | 0.0  | 0.0  | 0.0  | 0.0  | 0.0  | 0.0  | 0.0  | 0.0  | 0.0  | 0.0  | 0.0  | 0.0  | 0.0  | 0.0  | 0.0  |     |
| Whooping cough (0–14 yrs)                                       | 0.2     | 0.9  | 0.1  | 0.3  | 0.1  | 0.0  | 0.1  | 0.3  | 0.0  | 0.0  | 0.0  | 0.3  | 0.3  | 0.0  | 0.1  | 0.0  | 0.0  | 0.2  | 0.0  | 0.6  | 0.6  | 0.0  | 0.2  | 0.0  | 0.0  | 0.6  | 0.2  | 0.0  | 0.7  | 0.3  | 0.2  | 0.3  | 0.2  | 0.4  |     |
| Measles (1–14 yrs)                                              | 0.0     | 0.0  | 0.0  | 0.0  | 0.0  | 0.0  | 0.0  | 0.0  | 0.0  | 0.0  | 0.0  | 0.0  | 0.0  | 0.0  | 0.0  | 0.0  | 0.0  | 0.0  | 0.0  | 0.0  | 0.0  | 0.0  | 0.0  | 0.0  | 0.0  | 0.0  | 0.0  | 0.0  | 0.0  | 0.0  | 0.0  | 0.0  | 0.0  | 0.0  |     |
| Colorectal cancer                                               | 0.0     | 0.0  | 0.0  | 0.0  | 0.0  | 0.0  | 0.0  | 0.0  | 0.0  | 0.0  | 0.0  | 0.0  | 0.0  | 0.0  | 0.2  | 0.0  | 0.0  | 0.0  | 0.0  | 0.0  | 0.0  | 0.0  | 0.0  | 0.0  | 0.0  | 0.0  | 0.0  | 0.0  | 0.0  | 0.0  | 0.0  | 0.0  | 0.0  | 0.0  |     |
| Malignant neoplasm of skin                                      | 0.0     | 0.0  | 0.0  | 0.0  | 0.0  | 0.0  | 0.0  | 0.0  | 0.0  | 0.0  | 0.0  | 0.0  | 0.0  | 0.0  | 0.1  | 0.0  | 0.0  | 0.0  | 0.0  | 0.0  | 0.0  | 0.0  | 0.0  | 0.0  | 0.0  | 0.0  | 0.0  | 0.0  | 0.0  | 0.0  | 0.0  | 0.0  | 0.0  | 0.0  |     |
| Breast cancer                                                   | 0.0     | 0.0  | 0.0  | 0.0  | 0.0  | 0.0  | 0.0  | 0.0  | 0.0  | 0.0  | 0.0  | 0.0  | 0.0  | 0.0  | 0.0  | 0.0  | 0.0  | 0.0  | 0.0  | 0.0  | 0.0  | 0.0  | 0.0  | 0.0  | 0.0  | 0.0  | 0.0  | 0.0  | 0.0  | 0.0  | 0.0  | 0.0  | 0.0  | 0.0  |     |
| Cervical cancer and uterine cancer                              | 0.0     | 0.0  | 0.0  | 0.0  | 0.0  | 0.0  | 0.0  | 0.0  | 0.0  | 0.0  | 0.0  | 0.0  | 0.0  | 0.0  | 0.0  | 0.0  | 0.0  | 0.0  | 0.0  | 0.0  | 0.0  | 0.0  | 0.0  | 0.0  | 0.0  | 0.0  | 0.0  | 0.0  | 0.0  | 0.0  | 0.0  | 0.0  | 0.0  | 0.0  |     |
| Neoplasm of the testis                                          | 0.0     | 0.0  | 0.0  | 0.0  | 0.0  | 0.0  | 0.0  | 0.0  | 0.0  | 0.0  | 0.0  | 0.0  | 0.0  | 0.0  | 0.0  | 0.0  | 0.0  | 0.0  | 0.0  | 0.0  | 0.0  | 0.0  | 0.0  | 0.0  | 0.0  | 0.0  | 0.0  | 0.0  | 0.0  | 0.0  | 0.0  | 0.0  | 0.0  | 0.0  |     |
| Hodgkin's disease                                               | 0.0     | 0.0  | 0.0  | 0.0  | 0.0  | 0.0  | 0.0  | 0.0  | 0.0  | 0.0  | 0.0  | 0.0  | 0.0  | 0.0  | 0.0  | 0.0  | 0.0  | 0.0  | 0.0  | 0.0  | 0.0  | 0.0  | 0.0  | 0.0  | 0.0  | 0.0  | 0.0  | 0.0  | 0.0  | 0.0  | 0.0  | 0.0  | 0.0  | 0.0  |     |
| Leukemia                                                        | 0.2     | 0.4  | 0.1  | 0.2  | 0.4  | 0.4  | 0.1  | 0.3  | 0.2  | 0.0  | 0.0  | 0.3  | 0.2  | 0.2  | 0.8  | 0.4  | 0.0  | 0.0  | 0.3  | 0.6  | 0.0  | 0.0  | 0.2  | 0.4  | 0.2  | 0.1  | 0.3  | 0.0  | 0.2  | 0.5  | 0.1  | 0.2  | 0.2  | 0.6  |     |
| Thyroid disorders                                               | 0.0     | 0.0  | 0.0  | 0.0  | 0.0  | 0.0  | 0.0  | 0.0  | 0.0  | 0.0  | 0.0  | 0.0  | 0.0  | 0.0  | 0.0  | 0.0  | 0.0  | 0.0  | 0.0  | 0.0  | 0.0  | 0.0  | 0.0  | 0.0  | 0.0  | 0.0  | 0.0  | 0.0  | 0.0  | 0.0  | 0.0  | 0.0  | 0.0  | 0.0  |     |
| Diabetes mellitus                                               | 0.1     | 0.0  | 0.0  | 0.0  | 0.0  | 0.0  | 0.0  | 0.0  | 0.0  | 0.0  | 0.0  | 0.0  | 0.0  | 0.0  | 0.0  | 0.0  | 0.0  | 0.0  | 0.0  | 0.0  | 0.0  | 0.0  | 0.0  | 0.0  | 0.0  | 0.0  | 0.0  | 0.0  | 0.0  | 0.0  | 0.0  | 0.0  | 0.0  | 0.0  |     |
| Epilepsy                                                        | 0.2     | 0.2  | 0.1  | 0.6  | 0.1  | 0.4  | 0.0  | 1.0  | 0.1  | 0.2  | 0.0  | 0.6  | 0.3  | 0.3  | 0.0  | 0.1  | 0.0  | 0.2  | 0.2  | 0.0  | 0.3  | 0.0  | 0.4  | 0.0  | 0.1  | 0.0  | 0.2  | 0.0  | 0.6  | 0.1  | 0.6  | 0.3  | 0.2  | 0.6  |     |
| Rheumatic heart diseases                                        | 0.0     | 0.0  | 0.0  | 0.0  | 0.0  | 0.0  | 0.0  | 0.0  | 0.0  | 0.0  | 0.0  | 0.0  | 0.0  | 0.0  | 0.0  | 0.0  | 0.0  | 0.0  | 0.0  | 0.0  | 0.0  | 0.0  | 0.0  | 0.0  | 0.0  | 0.0  | 0.0  | 0.0  | 0.0  | 0.0  | 0.0  | 0.0  | 0.0  | 0.0  |     |
| Ischemic heart diseases: 50% of deaths                          | 0.0     | 0.0  | 0.1  | 0.0  | 0.0  | 0.0  | 0.0  | 0.0  | 0.0  | 0.1  | 0.0  | 0.0  | 0.0  | 0.0  | 0.0  | 0.0  | 0.0  | 0.0  | 0.0  | 0.0  | 0.0  | 0.0  | 0.0  | 0.0  | 0.0  | 0.0  | 0.0  | 0.0  | 0.0  | 0.0  | 0.0  | 0.0  | 0.1  | 0.0  |     |
| Cerebrovascular diseases                                        | 0.2     | 0.1  | 0.7  | 0.3  | 0.5  | 0.2  | 0.3  | 0.1  | 0.3  | 0.0  | 0.0  | 0.0  | 0.2  | 0.2  | 0.0  | 0.1  | 0.0  | 0.0  | 0.8  | 0.0  | 0.0  | 0.0  | 0.2  | 0.0  | 0.1  | 0.4  | 0.2  | 0.0  | 0.2  | 0.3  | 0.0  | 0.4  | 0.4  | 0.2  |     |
| Hypertensive diseases                                           | 0.0     | 0.0  | 0.0  | 0.0  | 0.0  | 0.0  | 0.0  | 0.0  | 0.0  | 0.0  | 0.0  | 0.0  | 0.0  | 0.1  | 0.0  | 0.0  | 0.0  | 0.0  | 0.0  | 0.0  | 0.0  | 0.0  | 0.0  | 0.0  | 0.0  | 0.0  | 0.0  | 0.0  | 0.0  | 0.0  | 0.0  | 0.0  | 0.0  | 0.0  |     |
| Nephritis and nephrosis                                         | 0.1     | 0.1  | 0.6  | 0.2  | 0.3  | 0.2  | 0.0  | 0.0  | 0.1  | 0.0  | 0.0  | 0.9  | 0.0  | 0.1  | 0.0  | 0.3  | 0.0  | 0.2  | 0.4  | 0.0  | 0.0  | 0.0  | 0.1  | 0.2  | 0.0  | 0.0  | 0.0  | 0.0  | 0.0  | 0.2  | 0.1  | 0.1  | 0.0  | 0.0  |     |
| Benign prostatic hyperplasia                                    | 0.0     | 0.0  | 0.0  | 0.0  | 0.0  | 0.0  | 0.0  | 0.0  | 0.0  | 0.0  | 0.0  | 0.0  | 0.0  | 0.0  | 0.0  | 0.0  | 0.0  | 0.0  | 0.0  | 0.0  | 0.0  | 0.0  | 0.0  | 0.0  | 0.0  | 0.0  | 0.0  | 0.0  | 0.0  | 0.0  | 0.0  | 0.0  | 0.0  | 0.0  |     |
| All respiratory diseases, excl. pneumonia/influenza (1–14 yrs)  | 0.0     | 0.0  | 0.0  | 0.0  | 0.0  | 0.0  | 0.0  | 0.0  | 0.0  | 0.0  | 0.0  | 0.0  | 0.0  | 0.0  | 0.0  | 0.0  | 0.0  | 0.0  | 0.0  | 0.0  | 0.0  | 0.0  | 0.0  | 0.0  | 0.0  | 0.0  | 0.0  | 0.0  | 0.0  | 0.0  | 0.0  | 0.0  | 0.0  | 0.0  |     |
| Peptic ulcer                                                    | 0.0     | 0.0  | 0.0  | 0.0  | 0.1  | 0.0  | 0.0  | 0.0  | 0.0  | 0.0  | 0.0  | 0.0  | 0.0  | 0.0  | 0.0  | 0.0  | 0.0  | 0.0  | 0.0  | 0.0  | 0.0  | 0.0  | 0.0  | 0.0  | 0.0  | 0.0  | 0.0  | 0.0  | 0.0  | 0.0  | 0.0  | 0.0  | 0.0  | 0.0  |     |
| Appendicitis                                                    | 0.0     | 0.0  | 0.0  | 0.0  | 0.0  | 0.0  | 0.1  | 0.0  | 0.0  | 0.0  | 0.0  | 0.0  | 0.0  | 0.0  | 0.0  | 0.0  | 0.0  | 0.0  | 0.0  | 0.0  | 0.0  | 0.0  | 0.0  | 0.0  | 0.0  | 0.0  | 0.0  | 0.0  | 0.0  | 0.0  | 0.0  | 0.0  | 0.0  | 0.0  |     |
| Abdominal hernia                                                | 0.1     | 0.0  | 0.2  | 0.1  | 0.1  | 0.0  | 0.0  | 0.0  | 0.0  | 0.2  | 0.0  | 0.0  | 0.0  | 0.1  | 0.0  | 0.0  | 0.0  | 0.0  | 0.6  | 0.0  | 0.3  | 0.0  | 0.0  | 0.0  | 0.0  | 0.3  | 0.0  | 0.0  | 0.3  | 0.0  | 0.0  | 0.1  | 0.2  | 0.2  |     |
| Cholelithiasis and cholecystitis                                | 0.0     | 0.0  | 0.0  | 0.0  | 0.0  | 0.0  | 0.0  | 0.0  | 0.0  | 0.0  | 0.0  | 0.0  | 0.0  | 0.0  | 0.0  | 0.0  | 0.0  | 0.0  | 0.0  | 0.0  | 0.0  | 0.0  | 0.0  | 0.0  | 0.0  | 0.0  | 0.0  | 0.0  | 0.0  | 0.0  | 0.0  | 0.0  | 0.0  | 0.0  |     |
| Maternal deaths                                                 | 0.0     | 0.0  | 0.0  | 0.0  | 0.0  | 0.0  | 0.0  | 0.0  | 0.0  | 0.0  | 0.0  | 0.0  | 0.0  | 0.0  | 0.0  | 0.0  | 0.0  | 0.0  | 0.0  | 0.0  | 0.0  | 0.0  | 0.0  | 0.0  | 0.0  | 0.0  | 0.0  | 0.0  | 0.0  | 0.0  | 0.0  | 0.0  | 0.0  | 0.0  |     |
| Perinatal deaths, excl. stillbirths                             | 87.3    | 75.9 | 84.3 | 75.1 | 55.7 | 80.8 | 82.0 | 81.9 | 81.6 | 86.5 | 77.8 | 83.9 | 82.5 | 74.0 | 79.8 | 78.8 | 78.8 | 79.1 | 83.2 | 72.2 | 89.2 | 89.5 | 85.2 | 82.9 | 73.6 | 82.5 | 69.5 | 85.2 | 81.6 | 83.5 | 82.5 | 83.5 | 84.9 | 82.4 |     |
| Congenital cardiovascular anomalies                             | 9.9     | 18.9 | 9.5  | 19.6 | 32.9 | 16.2 | 15.9 | 14.2 | 12.7 | 11.9 | 19.2 | 18.6 | 13.7 | 14.8 | 18.3 | 17.9 | 15.8 | 19.7 | 16.0 | 13.1 | 20.2 | 10.5 | 12.2 | 14.7 | 21.2 | 14.6 | 19.5 | 12.3 | 15.3 | 9.9  | 15.6 | 13.0 | 11.6 | 10.4 |     |
| Misadventures to patients during surgical and medical care      | 0.1     | 0.0  | 0.1  | 0.1  | 0.3  | 0.1  | 0.1  | 0.5  | 0.1  | 0.5  | 0.0  | 0.0  | 0.0  | 0.3  | 0.3  | 0.0  | 0.0  | 0.0  | 0.0  | 0.3  | 0.3  | 0.0  | 0.0  | 0.2  | 0.1  | 0.0  | 0.0  | 0.0  | 0.1  | 0.1  | 0.1  | 0.2  | 0.0  | 0.0  |     |

**Table S5. Percentage Distribution of Causes of Death Amenable to Healthcare for Ages 1–4 Years in 34 OECD Countries, Years 2011/2015.**

| Cause of Death                                                  | Country |      |      |      |      |      |      |      |      |      |      |      |      |      |      |      |      |      |      |      |      |       |      |      |      |      |      |      |      |      |      |      |      |      |     |
|-----------------------------------------------------------------|---------|------|------|------|------|------|------|------|------|------|------|------|------|------|------|------|------|------|------|------|------|-------|------|------|------|------|------|------|------|------|------|------|------|------|-----|
|                                                                 | CA      | CL   | US   | IL   | JP   | KR   | AT   | BE   | CZ   | DK   | EE   | FI   | FR   | DE   | GR   | HU   | IS   | IE   | IT   | LV   | LT   | LU    | NL   | NO   | PL   | PT   | SK   | SI   | ES   | SE   | CH   | GB   | AU   | NZ   |     |
| Tuberculosis                                                    | 0.0     | 0.3  | 0.2  | 0.0  | 0.0  | 0.2  | 0.0  | 1.9  | 0.0  | 2.6  | 0.0  | 0.0  | 0.6  | 0.2  | 1.0  | 0.0  | 0.0  | 0.0  | 0.7  | 0.0  | 0.0  | 0.0   | 0.0  | 0.0  | 0.2  | 0.0  | 0.0  | 0.0  | 0.3  | 0.0  | 0.0  | 0.3  | 0.5  | 0.0  |     |
| Septicemia                                                      | 6.1     | 2.7  | 7.1  | 7.1  | 7.8  | 4.9  | 0.0  | 16.0 | 4.0  | 0.0  | 13.6 | 0.0  | 7.7  | 7.0  | 2.0  | 0.9  | 50.0 | 5.4  | 7.5  | 14.3 | 6.3  | 0.0   | 10.0 | 2.4  | 5.5  | 9.2  | 1.5  | 0.0  | 10.5 | 0.0  | 15.2 | 6.5  | 10.3 | 12.8 |     |
| Pneumonia                                                       | 16.6    | 11.6 | 7.9  | 6.3  | 19.3 | 8.4  | 10.3 | 7.5  | 28.0 | 2.6  | 9.1  | 5.9  | 3.7  | 11.1 | 21.0 | 12.0 | 0.0  | 8.1  | 4.0  | 7.1  | 15.6 | 0.0   | 8.1  | 14.3 | 21.6 | 7.7  | 44.6 | 5.9  | 5.5  | 15.4 | 3.0  | 13.7 | 11.7 | 17.0 |     |
| Influenza                                                       | 3.3     | 0.3  | 3.1  | 0.0  | 3.6  | 2.1  | 1.7  | 1.9  | 2.7  | 0.0  | 0.0  | 11.8 | 1.7  | 1.0  | 2.0  | 0.9  | 0.0  | 8.1  | 1.1  | 0.0  | 0.0  | 0.0   | 0.0  | 0.0  | 0.9  | 0.0  | 0.0  | 0.6  | 4.6  | 0.0  | 3.3  | 6.4  | 4.3  |      |     |
| Intestinal infections other than typhoid, diphtheria (0–14 yrs) | 2.2     | 2.4  | 2.7  | 3.9  | 8.6  | 3.3  | 3.4  | 2.8  | 5.3  | 7.7  | 0.0  | 2.9  | 10.5 | 3.8  | 0.0  | 8.3  | 0.0  | 0.0  | 0.2  | 0.0  | 0.0  | 0.0   | 4.5  | 2.4  | 1.5  | 1.5  | 1.5  | 5.9  | 1.5  | 9.2  | 6.1  | 2.5  | 1.5  | 4.3  |     |
| Diphtheria, Tetanus, Poliomyelitis                              | 0.0     | 0.0  | 0.0  | 0.0  | 0.0  | 0.0  | 0.0  | 0.0  | 0.0  | 0.0  | 0.0  | 0.0  | 0.0  | 0.0  | 0.0  | 0.0  | 0.0  | 0.0  | 0.0  | 0.0  | 0.0  | 0.0   | 0.0  | 0.0  | 0.0  | 0.0  | 0.0  | 0.0  | 0.0  | 0.0  | 0.0  | 0.0  | 0.0  | 0.0  |     |
| Whooping cough (0–14 yrs)                                       | 0.0     | 0.3  | 0.1  | 0.0  | 0.0  | 0.0  | 0.0  | 0.0  | 0.0  | 0.0  | 0.0  | 0.0  | 0.0  | 0.0  | 0.0  | 0.0  | 0.0  | 0.0  | 0.0  | 0.0  | 0.0  | 0.0   | 0.0  | 0.0  | 0.0  | 0.0  | 0.0  | 0.0  | 0.0  | 0.0  | 0.0  | 0.0  | 0.0  | 2.1  |     |
| Measles (1–14 yrs)                                              | 0.0     | 0.0  | 0.0  | 0.0  | 0.1  | 0.0  | 0.0  | 0.0  | 0.0  | 0.0  | 0.0  | 0.0  | 0.0  | 0.2  | 0.0  | 0.0  | 0.0  | 0.0  | 0.0  | 0.0  | 0.0  | 0.0   | 0.0  | 0.0  | 0.0  | 0.0  | 0.0  | 0.0  | 0.0  | 0.0  | 0.0  | 0.0  | 0.0  | 0.0  |     |
| Colorectal cancer                                               | 0.0     | 0.0  | 0.1  | 0.0  | 0.0  | 0.0  | 0.0  | 0.0  | 0.0  | 0.0  | 0.0  | 0.0  | 0.0  | 0.2  | 0.0  | 0.0  | 0.0  | 0.0  | 0.0  | 0.0  | 0.0  | 0.0   | 0.0  | 0.0  | 0.0  | 0.0  | 0.0  | 0.0  | 0.0  | 0.0  | 0.0  | 0.0  | 0.0  | 0.0  |     |
| Malignant neoplasm of skin                                      | 0.0     | 0.0  | 0.1  | 0.0  | 0.0  | 0.0  | 0.0  | 0.0  | 0.0  | 0.0  | 0.0  | 0.0  | 0.0  | 0.0  | 0.0  | 0.0  | 0.0  | 0.0  | 0.0  | 0.0  | 0.0  | 0.0   | 0.0  | 0.0  | 0.0  | 0.0  | 0.0  | 0.0  | 0.0  | 0.0  | 0.0  | 0.0  | 0.0  | 0.0  |     |
| Breast cancer                                                   | 0.0     | 0.0  | 0.0  | 0.0  | 0.0  | 0.0  | 0.0  | 0.0  | 0.0  | 0.0  | 0.0  | 0.0  | 0.0  | 0.3  | 0.0  | 0.0  | 0.0  | 0.0  | 0.0  | 0.0  | 0.0  | 0.0   | 0.0  | 0.0  | 0.0  | 0.0  | 0.0  | 0.0  | 0.0  | 0.0  | 0.0  | 0.0  | 0.0  | 0.0  |     |
| Cervical cancer and uterine cancer                              | 0.0     | 0.0  | 0.0  | 0.0  | 0.0  | 0.0  | 0.0  | 0.0  | 0.0  | 0.0  | 0.0  | 0.0  | 0.0  | 0.2  | 0.0  | 0.0  | 0.0  | 0.0  | 0.0  | 7.1  | 0.0  | 0.0   | 0.0  | 0.0  | 0.0  | 0.0  | 0.0  | 0.0  | 0.0  | 0.0  | 0.0  | 0.0  | 0.0  | 0.0  |     |
| Neoplasm of the testis                                          | 0.0     | 0.0  | 0.1  | 0.0  | 0.0  | 0.0  | 0.0  | 0.0  | 0.0  | 0.0  | 0.0  | 0.0  | 0.0  | 0.2  | 0.0  | 0.0  | 0.0  | 0.0  | 0.0  | 0.0  | 0.0  | 0.0   | 0.0  | 0.0  | 0.0  | 0.0  | 0.0  | 0.0  | 0.0  | 0.0  | 0.0  | 0.0  | 0.0  | 0.0  |     |
| Hodgkin's disease                                               | 0.0     | 0.3  | 0.0  | 0.0  | 0.0  | 0.0  | 0.0  | 0.0  | 0.0  | 0.0  | 0.0  | 0.0  | 0.0  | 0.0  | 0.0  | 0.0  | 0.0  | 0.0  | 0.0  | 0.0  | 0.0  | 0.0   | 0.0  | 0.0  | 0.0  | 0.0  | 0.0  | 0.0  | 0.0  | 0.0  | 0.0  | 0.0  | 0.0  | 0.0  |     |
| Leukemia                                                        | 14.4    | 20.1 | 15.3 | 10.2 | 9.5  | 19.4 | 17.2 | 11.3 | 12.0 | 28.2 | 18.2 | 14.7 | 19.4 | 16.3 | 15.0 | 18.5 | 0.0  | 16.2 | 21.8 | 21.4 | 15.6 | 0.0   | 21.7 | 23.8 | 10.7 | 23.1 | 15.4 | 17.6 | 18.3 | 29.2 | 30.3 | 11.2 | 15.2 | 14.9 |     |
| Thyroid disorders                                               | 0.0     | 0.0  | 0.1  | 0.0  | 0.1  | 0.0  | 0.0  | 0.0  | 0.0  | 0.0  | 0.0  | 0.0  | 0.0  | 0.2  | 0.0  | 0.0  | 0.0  | 0.0  | 0.2  | 0.0  | 0.0  | 0.0   | 0.0  | 0.0  | 0.0  | 0.0  | 0.0  | 0.0  | 0.3  | 0.0  | 0.0  | 0.1  | 0.0  | 0.0  |     |
| Diabetes mellitus                                               | 0.6     | 0.0  | 0.7  | 0.0  | 0.0  | 0.0  | 0.0  | 0.0  | 0.0  | 0.0  | 0.0  | 0.0  | 0.9  | 0.7  | 0.0  | 0.0  | 0.0  | 0.0  | 0.2  | 0.0  | 3.1  | 0.0   | 0.0  | 0.2  | 0.0  | 1.5  | 0.0  | 0.0  | 0.0  | 0.0  | 0.4  | 0.0  | 0.0  | 0.0  |     |
| Epilepsy                                                        | 7.2     | 11.9 | 3.4  | 22.0 | 1.5  | 17.5 | 5.2  | 10.3 | 6.7  | 5.1  | 18.2 | 5.9  | 12.8 | 10.9 | 3.0  | 11.1 | 0.0  | 21.6 | 9.2  | 7.1  | 9.4  | 0.0   | 19.0 | 7.1  | 4.6  | 7.7  | 0.0  | 5.9  | 6.4  | 6.2  | 3.0  | 9.1  | 8.8  | 12.8 |     |
| Rheumatic heart diseases                                        | 0.0     | 0.0  | 0.2  | 0.0  | 0.1  | 0.0  | 0.0  | 0.0  | 0.0  | 0.0  | 0.0  | 0.0  | 0.0  | 0.3  | 0.0  | 0.0  | 0.0  | 0.4  | 0.0  | 0.0  | 0.0  | 0.0   | 0.0  | 0.0  | 0.2  | 0.0  | 0.0  | 0.0  | 0.0  | 0.0  | 0.1  | 0.0  | 0.0  | 0.0  |     |
| Ischemic heart diseases: 50% of deaths                          | 0.3     | 0.0  | 0.6  | 0.4  | 0.4  | 0.0  | 0.0  | 0.5  | 0.0  | 0.0  | 0.0  | 0.0  | 0.0  | 0.1  | 0.0  | 0.0  | 0.0  | 0.7  | 0.0  | 0.0  | 0.0  | 0.5   | 0.0  | 0.0  | 0.0  | 0.0  | 0.0  | 0.0  | 0.0  | 0.0  | 0.3  | 0.2  | 0.0  | 0.0  |     |
| Cerebrovascular diseases                                        | 7.2     | 2.7  | 6.0  | 2.4  | 1.4  | 3.5  | 0.0  | 0.9  | 0.0  | 0.0  | 0.0  | 2.9  | 6.0  | 3.1  | 2.0  | 1.9  | 0.0  | 2.7  | 4.6  | 7.1  | 3.1  | 0.0   | 1.8  | 7.1  | 1.1  | 3.1  | 3.1  | 0.0  | 3.5  | 1.5  | 6.1  | 3.1  | 2.9  | 0.0  |     |
| Hypertensive diseases                                           | 0.0     | 0.3  | 0.4  | 0.0  | 0.0  | 0.0  | 0.0  | 0.0  | 0.0  | 0.0  | 0.0  | 0.0  | 0.0  | 1.0  | 0.0  | 0.0  | 0.0  | 0.4  | 0.0  | 0.0  | 0.0  | 0.0   | 0.0  | 0.0  | 0.0  | 1.5  | 0.0  | 0.0  | 0.0  | 0.0  | 0.0  | 0.0  | 0.0  | 0.0  |     |
| Nephritis and nephrosis                                         | 0.0     | 2.4  | 1.6  | 2.4  | 0.9  | 1.4  | 1.7  | 3.8  | 0.0  | 0.0  | 0.0  | 5.9  | 0.9  | 1.6  | 0.0  | 0.0  | 0.0  | 1.1  | 0.0  | 0.0  | 0.0  | 0.9   | 2.4  | 0.9  | 0.0  | 0.0  | 0.0  | 0.9  | 0.0  | 0.0  | 0.4  | 1.0  | 0.0  | 0.0  |     |
| Benign prostatic hyperplasia                                    | 0.0     | 0.0  | 0.0  | 0.0  | 0.0  | 0.0  | 0.0  | 0.0  | 0.0  | 0.0  | 0.0  | 0.0  | 0.0  | 0.0  | 0.0  | 0.0  | 0.0  | 0.0  | 0.0  | 0.0  | 0.0  | 0.0   | 0.0  | 0.0  | 0.0  | 0.0  | 0.0  | 0.0  | 0.0  | 0.0  | 0.0  | 0.0  | 0.0  | 0.0  |     |
| All respiratory diseases, excl. pneumonia/influenza (1–14 yrs)  | 13.9    | 11.2 | 19.8 | 12.5 | 14.1 | 12.9 | 17.2 | 14.1 | 20.0 | 15.4 | 9.1  | 17.6 | 12.3 | 12.7 | 7.0  | 20.4 | 0.0  | 2.7  | 12.3 | 7.1  | 0.0  | 100.0 | 15.4 | 2.4  | 2.0  | 7.7  | 4.6  | 5.9  | 13.7 | 10.8 | 9.1  | 19.1 | 18.1 | 8.5  |     |
| Peptic ulcer                                                    | 0.0     | 0.3  | 0.0  | 0.0  | 0.6  | 0.5  | 0.0  | 0.0  | 0.0  | 0.0  | 0.0  | 0.0  | 0.0  | 0.0  | 0.0  | 0.9  | 0.0  | 2.7  | 0.2  | 0.0  | 0.0  | 0.0   | 0.0  | 0.0  | 0.2  | 0.0  | 0.0  | 0.0  | 0.0  | 0.0  | 0.5  | 0.0  | 0.0  | 0.0  |     |
| Appendicitis                                                    | 0.6     | 0.3  | 0.2  | 0.8  | 0.1  | 0.0  | 0.0  | 0.9  | 0.0  | 0.0  | 0.0  | 0.3  | 0.0  | 0.0  | 0.0  | 0.0  | 0.0  | 0.0  | 0.0  | 0.0  | 0.0  | 0.0   | 0.0  | 0.0  | 0.2  | 0.0  | 0.0  | 0.0  | 0.0  | 0.0  | 0.3  | 0.5  | 0.0  | 0.0  |     |
| Abdominal hernia                                                | 0.6     | 0.3  | 0.5  | 0.0  | 0.5  | 0.2  | 0.0  | 0.9  | 0.0  | 0.0  | 0.0  | 0.0  | 0.0  | 0.2  | 0.0  | 0.0  | 0.0  | 0.2  | 7.1  | 0.0  | 0.0  | 0.0   | 0.0  | 0.0  | 0.0  | 1.5  | 0.0  | 0.0  | 0.3  | 0.0  | 0.3  | 0.5  | 0.0  | 0.0  |     |
| Cholelithiasis and cholecystitis                                | 0.0     | 0.0  | 0.0  | 0.0  | 0.0  | 0.0  | 0.0  | 0.0  | 0.0  | 0.0  | 0.0  | 0.0  | 0.0  | 0.0  | 0.0  | 0.0  | 0.0  | 0.0  | 0.0  | 0.0  | 0.0  | 0.0   | 0.0  | 0.0  | 0.0  | 0.0  | 0.0  | 0.0  | 0.0  | 0.0  | 0.0  | 0.0  | 0.0  | 0.0  |     |
| Maternal deaths                                                 | 0.0     | 0.0  | 0.0  | 0.0  | 0.0  | 0.0  | 0.0  | 0.0  | 0.0  | 0.0  | 0.0  | 0.0  | 0.0  | 0.0  | 0.0  | 0.0  | 0.0  | 0.0  | 0.0  | 0.0  | 0.0  | 0.0   | 0.0  | 0.0  | 0.0  | 0.0  | 0.0  | 0.0  | 0.0  | 0.0  | 0.0  | 0.0  | 0.0  | 0.0  | 0.0 |
| Perinatal deaths, excl. stillbirths                             | 5.5     | 5.1  | 5.6  | 1.6  | 3.2  | 8.4  | 8.6  | 5.6  | 8.0  | 2.6  | 0.0  | 5.9  | 0.6  | 5.7  | 0.0  | 1.9  | 0.0  | 0.0  | 9.2  | 0.0  | 0.0  | 0.0   | 2.7  | 2.4  | 2.2  | 1.5  | 0.0  | 11.8 | 10.5 | 9.2  | 6.1  | 5.9  | 6.4  | 10.6 |     |
| Congenital cardiovascular anomalies                             | 21.1    | 26.9 | 22.8 | 29.8 | 27.1 | 17.1 | 31.0 | 21.6 | 13.3 | 30.8 | 31.8 | 26.5 | 21.9 | 21.5 | 43.0 | 23.1 | 50.0 | 32.4 | 25.1 | 21.4 | 43.8 | 0.0   | 14.5 | 35.7 | 47.3 | 33.8 | 27.7 | 41.2 | 26.7 | 13.8 | 21.2 | 20.8 | 15.6 | 12.8 |     |
| Misadventures to patients during surgical and medical care      | 0.6     | 0.3  | 1.6  | 0.8  | 1.1  | 0.2  | 3.4  | 0.0  | 0.0  | 5.1  | 0.0  | 0.0  | 0.9  | 1.4  | 4.0  | 0.0  | 0.0  | 0.0  | 0.9  | 0.0  | 3.1  | 0.0   | 0.9  | 0.0  | 0.6  | 1.5  | 0.0  | 5.9  | 1.2  | 0.0  | 0.0  | 2.3  | 0.5  | 0.0  |     |

1  
2  
3  
4  
5  
6  
7  
8  
9  
10  
11  
12  
13  
14  
15  
16  
17  
18  
19  
20  
21  
22  
23  
24  
25  
26  
27  
28  
29  
30  
31  
32  
33  
34  
35  
36  
37  
38  
39  
40  
41  
42  
43  
44  
45  
46

For peer review only

**Table S6. Percentage Distribution of Causes of Death Amenable to Healthcare for Ages 5–9 Years in 34 OECD Countries, Years 2011/2015.**

| Cause of Death                                                  | Country |      |      |      |      |      |      |      |      |      |      |      |      |      |      |      |      |      |      |      |      |      |      |      |      |      |      |      |      |      |      |      |      |      |     |
|-----------------------------------------------------------------|---------|------|------|------|------|------|------|------|------|------|------|------|------|------|------|------|------|------|------|------|------|------|------|------|------|------|------|------|------|------|------|------|------|------|-----|
|                                                                 | CA      | CL   | US   | IL   | JP   | KR   | AT   | BE   | CZ   | DK   | EE   | FI   | FR   | DE   | GR   | HU   | IS   | IE   | IT   | LV   | LT   | LU   | NL   | NO   | PL   | PT   | SK   | SI   | ES   | SE   | CH   | GB   | AU   | NZ   |     |
| Tuberculosis                                                    | 0.0     | 0.6  | 0.0  | 0.0  | 0.0  | 0.0  | 0.0  | 0.0  | 0.0  | 0.0  | 0.0  | 0.0  | 0.0  | 0.3  | 0.0  | 0.0  | 0.0  | 0.0  | 0.8  | 0.0  | 0.0  | 0.0  | 0.0  | 0.0  | 0.4  | 0.0  | 0.0  | 0.0  | 0.0  | 0.0  | 0.0  | 0.0  | 0.0  | 0.0  | 0.0 |
| Septicemia                                                      | 10.5    | 2.2  | 6.2  | 12.7 | 8.9  | 1.8  | 0.0  | 2.1  | 0.0  | 0.0  | 0.0  | 0.0  | 7.1  | 4.1  | 0.0  | 0.0  | 50.0 | 0.0  | 5.7  | 5.6  | 10.5 | 0.0  | 5.9  | 0.0  | 3.5  | 2.9  | 0.0  | 0.0  | 1.2  | 4.8  | 3.7  | 5.8  | 5.5  | 8.3  |     |
| Pneumonia                                                       | 7.8     | 7.7  | 6.4  | 7.6  | 16.8 | 3.7  | 3.2  | 6.3  | 27.9 | 15.0 | 60.0 | 0.0  | 2.5  | 6.6  | 6.8  | 6.7  | 0.0  | 0.0  | 2.3  | 0.0  | 0.0  | 0.0  | 8.8  | 0.0  | 28.0 | 5.8  | 26.9 | 12.5 | 2.0  | 4.8  | 3.7  | 9.0  | 6.3  | 0.0  |     |
| Influenza                                                       | 5.2     | 0.0  | 3.2  | 0.0  | 7.3  | 0.9  | 0.0  | 2.1  | 3.3  | 5.0  | 0.0  | 7.1  | 1.5  | 0.9  | 3.4  | 0.0  | 0.0  | 0.0  | 0.4  | 0.0  | 0.0  | 0.0  | 2.9  | 0.0  | 1.8  | 0.0  | 0.0  | 12.5 | 1.6  | 7.1  | 0.0  | 4.5  | 3.9  | 8.3  |     |
| Intestinal infections other than typhoid, diphtheria (0–14 yrs) | 0.0     | 0.6  | 1.6  | 2.5  | 4.7  | 1.8  | 0.0  | 4.2  | 1.6  | 0.0  | 20.0 | 0.0  | 2.5  | 3.4  | 0.0  | 3.4  | 0.0  | 0.0  | 0.8  | 0.0  | 5.3  | 0.0  | 4.4  | 0.0  | 0.4  | 0.0  | 0.0  | 0.0  | 1.2  | 0.0  | 0.0  | 1.3  | 1.6  | 0.0  |     |
| Diphtheria, Tetanus, Poliomyelitis                              | 0.0     | 0.0  | 0.0  | 0.0  | 0.0  | 0.0  | 0.0  | 0.0  | 0.0  | 0.0  | 0.0  | 0.0  | 0.0  | 0.0  | 0.0  | 0.0  | 0.0  | 0.0  | 0.0  | 0.0  | 0.0  | 0.0  | 0.0  | 0.0  | 0.0  | 0.0  | 0.0  | 0.4  | 0.0  | 0.0  | 0.0  | 0.0  | 0.0  | 0.0  |     |
| Whooping cough (0–14 yrs)                                       | 0.0     | 0.6  | 0.0  | 0.0  | 0.0  | 0.0  | 0.0  | 0.0  | 0.0  | 0.0  | 0.0  | 0.0  | 0.0  | 0.0  | 0.0  | 0.0  | 0.0  | 0.0  | 0.0  | 0.0  | 0.0  | 0.0  | 0.0  | 0.0  | 0.0  | 0.0  | 0.0  | 0.0  | 0.0  | 0.0  | 0.0  | 0.0  | 0.0  | 0.0  | 0.0 |
| Measles (1–14 yrs)                                              | 0.0     | 0.0  | 0.0  | 0.0  | 0.0  | 0.0  | 0.0  | 0.0  | 0.0  | 0.0  | 0.0  | 0.0  | 0.0  | 0.0  | 0.0  | 0.0  | 0.0  | 0.0  | 0.0  | 0.0  | 0.0  | 0.0  | 0.0  | 0.0  | 0.0  | 0.0  | 0.0  | 0.0  | 0.0  | 0.0  | 0.0  | 0.0  | 0.0  | 0.0  | 0.0 |
| Colorectal cancer                                               | 0.0     | 0.0  | 0.0  | 2.5  | 0.0  | 0.0  | 0.0  | 0.0  | 0.0  | 0.0  | 0.0  | 0.0  | 0.0  | 0.0  | 0.0  | 0.0  | 0.0  | 0.0  | 0.0  | 0.0  | 0.0  | 0.0  | 0.0  | 0.0  | 0.0  | 0.0  | 0.0  | 0.4  | 0.0  | 0.0  | 0.0  | 0.0  | 0.0  | 0.0  |     |
| Malignant neoplasm of skin                                      | 0.0     | 0.6  | 0.0  | 0.0  | 0.0  | 0.0  | 0.0  | 0.0  | 1.6  | 0.0  | 0.0  | 0.0  | 0.0  | 0.3  | 0.0  | 0.0  | 0.0  | 0.0  | 0.0  | 0.0  | 0.0  | 0.0  | 0.0  | 0.0  | 0.0  | 0.0  | 0.0  | 0.0  | 0.0  | 0.0  | 0.0  | 0.3  | 0.0  | 0.0  |     |
| Breast cancer                                                   | 0.0     | 0.0  | 0.0  | 0.0  | 0.0  | 0.0  | 0.0  | 0.0  | 0.0  | 0.0  | 0.0  | 0.0  | 0.0  | 0.0  | 0.0  | 0.0  | 0.0  | 0.0  | 0.0  | 0.0  | 0.0  | 0.0  | 0.0  | 0.0  | 0.0  | 0.0  | 0.0  | 0.0  | 0.0  | 0.0  | 0.0  | 0.0  | 0.0  | 0.0  | 0.0 |
| Cervical cancer and uterine cancer                              | 0.0     | 0.0  | 0.0  | 0.0  | 0.0  | 0.0  | 0.0  | 0.0  | 0.0  | 0.0  | 0.0  | 0.0  | 0.0  | 0.0  | 0.0  | 0.0  | 0.0  | 0.0  | 0.0  | 0.0  | 0.0  | 0.0  | 0.0  | 0.0  | 0.0  | 0.0  | 0.0  | 0.0  | 0.0  | 0.0  | 0.0  | 0.0  | 0.0  | 0.0  | 0.0 |
| Neoplasm of the testis                                          | 0.0     | 0.0  | 0.2  | 0.0  | 0.0  | 0.5  | 0.0  | 0.0  | 0.0  | 0.0  | 0.0  | 0.0  | 0.0  | 0.3  | 0.0  | 0.0  | 0.0  | 0.0  | 0.0  | 0.0  | 0.0  | 0.0  | 0.0  | 0.0  | 0.0  | 0.0  | 0.0  | 0.0  | 0.0  | 0.0  | 0.0  | 0.0  | 0.0  | 0.0  | 0.0 |
| Hodgkin's disease                                               | 0.0     | 0.6  | 0.2  | 2.5  | 0.2  | 0.0  | 0.0  | 0.0  | 0.0  | 0.0  | 0.0  | 0.0  | 0.5  | 0.0  | 0.0  | 0.0  | 0.0  | 0.0  | 0.8  | 0.0  | 0.0  | 0.0  | 0.0  | 0.0  | 0.0  | 0.0  | 0.0  | 0.4  | 0.0  | 0.0  | 0.0  | 0.8  | 0.8  | 0.0  |     |
| Leukemia                                                        | 17.0    | 47.5 | 20.6 | 21.5 | 20.9 | 39.4 | 22.6 | 22.9 | 27.9 | 30.0 | 0.0  | 28.6 | 34.6 | 25.3 | 39.0 | 28.6 | 0.0  | 29.4 | 39.9 | 27.8 | 42.1 | 33.3 | 26.5 | 48.0 | 16.7 | 37.7 | 23.1 | 62.5 | 43.4 | 35.7 | 40.7 | 21.4 | 28.1 | 25.0 |     |
| Thyroid disorders                                               | 1.3     | 0.0  | 0.2  | 0.0  | 0.0  | 0.5  | 0.0  | 0.0  | 0.0  | 0.0  | 0.0  | 0.0  | 0.0  | 0.3  | 0.0  | 0.0  | 0.0  | 0.0  | 0.0  | 0.0  | 0.0  | 0.0  | 0.0  | 0.0  | 0.0  | 0.0  | 0.0  | 0.0  | 0.0  | 0.0  | 0.0  | 0.0  | 0.0  | 0.0  | 0.0 |
| Diabetes mellitus                                               | 0.0     | 0.0  | 1.9  | 0.0  | 0.2  | 0.0  | 0.0  | 0.0  | 3.3  | 0.0  | 0.0  | 7.1  | 0.5  | 1.6  | 1.7  | 0.0  | 0.0  | 0.0  | 0.0  | 0.0  | 0.0  | 0.0  | 0.0  | 0.0  | 0.4  | 0.0  | 0.0  | 0.0  | 0.8  | 0.0  | 0.0  | 0.8  | 0.8  | 2.3  | 0.0 |
| Epilepsy                                                        | 14.4    | 12.2 | 5.7  | 11.4 | 3.7  | 17.9 | 19.4 | 16.7 | 9.8  | 10.0 | 0.0  | 14.3 | 19.3 | 19.1 | 8.5  | 23.5 | 0.0  | 5.9  | 6.5  | 11.1 | 15.8 | 0.0  | 19.1 | 20.0 | 9.2  | 8.7  | 7.7  | 12.5 | 10.5 | 9.5  | 14.8 | 11.8 | 11.7 | 25.0 |     |
| Rheumatic heart diseases                                        | 1.3     | 0.0  | 0.1  | 0.0  | 0.0  | 0.0  | 0.0  | 0.0  | 0.0  | 0.0  | 0.0  | 0.0  | 0.0  | 0.0  | 0.0  | 0.0  | 0.0  | 0.0  | 0.4  | 0.0  | 0.0  | 0.0  | 1.5  | 4.0  | 0.4  | 0.0  | 0.0  | 0.4  | 0.0  | 0.0  | 0.3  | 0.3  | 0.0  | 0.0  |     |
| Ischemic heart diseases: 50% of deaths                          | 0.7     | 0.0  | 0.3  | 1.3  | 0.5  | 0.0  | 0.0  | 0.0  | 0.0  | 0.0  | 0.0  | 0.0  | 0.3  | 0.0  | 0.0  | 0.8  | 0.0  | 0.0  | 0.4  | 0.0  | 0.0  | 0.0  | 0.0  | 0.0  | 0.0  | 1.4  | 0.0  | 0.0  | 0.2  | 0.0  | 0.0  | 0.3  | 0.0  | 0.0  |     |
| Cerebrovascular diseases                                        | 3.9     | 3.9  | 8.3  | 2.5  | 7.3  | 11.0 | 0.0  | 12.5 | 9.8  | 15.0 | 20.0 | 0.0  | 12.2 | 4.4  | 1.7  | 11.8 | 0.0  | 0.0  | 6.1  | 27.8 | 10.5 | 0.0  | 5.9  | 4.0  | 3.5  | 2.9  | 7.7  | 0.0  | 5.3  | 2.4  | 7.4  | 5.0  | 4.7  | 0.0  |     |
| Hypertensive diseases                                           | 0.0     | 1.1  | 0.1  | 0.0  | 0.0  | 0.0  | 0.0  | 0.0  | 0.0  | 0.0  | 0.0  | 0.0  | 0.0  | 1.3  | 0.0  | 0.0  | 0.0  | 0.0  | 0.8  | 0.0  | 0.0  | 0.0  | 0.0  | 0.0  | 0.0  | 0.0  | 0.0  | 0.0  | 0.0  | 0.0  | 0.0  | 0.0  | 0.0  | 0.0  | 0.0 |
| Nephritis and nephrosis                                         | 0.0     | 1.1  | 1.6  | 5.1  | 1.6  | 1.8  | 0.0  | 4.2  | 0.0  | 0.0  | 0.0  | 7.1  | 0.5  | 1.6  | 0.0  | 1.7  | 0.0  | 11.8 | 3.8  | 0.0  | 0.0  | 0.0  | 2.9  | 0.0  | 1.4  | 2.9  | 3.8  | 0.0  | 2.8  | 0.0  | 0.0  | 1.5  | 0.0  | 0.0  |     |
| Benign prostatic hyperplasia                                    | 0.0     | 0.0  | 0.0  | 0.0  | 0.0  | 0.0  | 0.0  | 0.0  | 0.0  | 0.0  | 0.0  | 0.0  | 0.0  | 0.0  | 0.0  | 0.0  | 0.0  | 0.0  | 0.0  | 0.0  | 0.0  | 0.0  | 0.0  | 0.0  | 0.0  | 0.0  | 0.0  | 0.0  | 0.0  | 0.0  | 0.0  | 0.0  | 0.0  | 0.0  | 0.0 |
| All respiratory diseases, excl. pneumonia/influenza (1–14 yrs)  | 19.6    | 3.9  | 24.5 | 11.4 | 12.3 | 9.2  | 9.7  | 12.5 | 8.2  | 5.0  | 0.0  | 21.4 | 9.7  | 10.6 | 5.1  | 13.4 | 0.0  | 23.5 | 10.3 | 11.1 | 5.3  | 33.3 | 8.8  | 4.0  | 4.6  | 8.7  | 11.5 | 0.0  | 7.3  | 4.8  | 14.8 | 20.6 | 18.0 | 33.3 |     |
| Peptic ulcer                                                    | 0.0     | 0.6  | 0.2  | 0.0  | 0.6  | 0.0  | 0.0  | 0.0  | 0.0  | 5.0  | 0.0  | 0.0  | 0.0  | 0.0  | 0.0  | 0.0  | 0.0  | 0.0  | 0.0  | 0.0  | 0.0  | 0.0  | 0.0  | 0.0  | 0.0  | 0.0  | 0.0  | 0.0  | 0.0  | 0.0  | 0.0  | 0.3  | 0.0  | 0.0  |     |
| Appendicitis                                                    | 0.0     | 1.7  | 0.5  | 0.0  | 0.5  | 0.5  | 0.0  | 0.0  | 0.0  | 0.0  | 0.0  | 0.0  | 0.0  | 0.3  | 0.0  | 0.0  | 0.0  | 0.0  | 0.4  | 0.0  | 0.0  | 0.0  | 0.0  | 0.0  | 0.4  | 2.9  | 0.0  | 0.0  | 0.4  | 0.0  | 1.0  | 0.0  | 0.0  | 0.0  |     |
| Abdominal hernia                                                | 0.0     | 0.0  | 0.4  | 0.0  | 0.5  | 0.5  | 0.0  | 0.0  | 0.0  | 0.0  | 0.0  | 0.0  | 0.0  | 0.0  | 0.0  | 0.0  | 0.0  | 0.0  | 0.4  | 0.0  | 0.0  | 0.0  | 0.0  | 0.0  | 0.0  | 0.0  | 0.0  | 0.0  | 2.4  | 0.0  | 0.0  | 0.0  | 0.0  | 0.0  |     |
| Cholelithiasis and cholecystitis                                | 0.0     | 0.0  | 0.0  | 0.0  | 0.0  | 0.0  | 0.0  | 0.0  | 0.0  | 0.0  | 0.0  | 0.0  | 0.0  | 0.0  | 0.0  | 0.0  | 0.0  | 0.0  | 0.0  | 0.0  | 0.0  | 0.0  | 0.0  | 0.0  | 0.0  | 0.0  | 0.0  | 0.0  | 0.0  | 0.0  | 0.0  | 0.0  | 0.0  | 0.0  | 0.0 |
| Maternal deaths                                                 | 0.0     | 0.0  | 0.0  | 0.0  | 0.0  | 0.0  | 0.0  | 0.0  | 0.0  | 0.0  | 0.0  | 0.0  | 0.0  | 0.0  | 0.0  | 0.0  | 0.0  | 0.0  | 0.0  | 0.0  | 0.0  | 0.0  | 0.0  | 0.0  | 0.0  | 0.0  | 0.0  | 0.0  | 0.0  | 0.0  | 0.0  | 0.0  | 0.0  | 0.0  | 0.0 |
| Perinatal deaths, excl. stillbirths                             | 5.2     | 3.3  | 3.4  | 0.0  | 2.7  | 0.0  | 6.5  | 12.5 | 1.6  | 0.0  | 0.0  | 7.1  | 0.0  | 3.8  | 0.0  | 0.0  | 0.0  | 5.9  | 5.3  | 0.0  | 0.0  | 0.0  | 0.0  | 8.0  | 0.4  | 0.0  | 0.0  | 0.0  | 5.3  | 9.5  | 0.0  | 2.0  | 3.1  | 0.0  |     |
| Congenital cardiovascular anomalies                             | 11.8    | 12.2 | 12.5 | 16.5 | 8.7  | 9.6  | 25.8 | 4.2  | 4.9  | 15.0 | 0.0  | 7.1  | 8.1  | 14.4 | 30.5 | 10.1 | 50.0 | 23.5 | 14.4 | 16.7 | 10.5 | 0.0  | 13.2 | 12.0 | 27.7 | 17.4 | 15.4 | 0.0  | 15.4 | 16.7 | 11.1 | 11.6 | 12.5 | 0.0  |     |
| Misadventures to patients during surgical and medical care      | 1.3     | 0.0  | 1.6  | 2.5  | 2.7  | 0.9  | 12.9 | 0.0  | 0.0  | 0.0  | 0.0  | 0.0  | 0.5  | 1.6  | 3.4  | 0.0  | 0.0  | 0.0  | 0.8  | 0.0  | 0.0  | 33.3 | 0.0  | 0.0  | 1.4  | 8.7  | 3.8  | 0.0  | 0.8  | 2.4  | 0.0  | 2.0  | 1.6  | 0.0  |     |



1  
2  
3  
4  
5  
6  
7  
8  
9  
10  
11  
12  
13  
14  
15  
16  
17  
18  
19  
20  
21  
22  
23  
24  
25  
26  
27  
28  
29  
30  
31  
32  
33  
34  
35  
36  
37  
38  
39  
40  
41  
42  
43  
44  
45  
46

For peer review only

**Table S7. Percentage Distribution of Causes of Death Amenable to Healthcare for Ages 10–14 Years in 34 OECD Countries, Years 2011/2015.**

| Cause of Death                                                  | Country |      |      |      |      |      |      |      |      |      |      |      |      |      |      |      |      |      |      |      |      |       |      |      |      |      |      |      |      |      |      |      |      |      |     |
|-----------------------------------------------------------------|---------|------|------|------|------|------|------|------|------|------|------|------|------|------|------|------|------|------|------|------|------|-------|------|------|------|------|------|------|------|------|------|------|------|------|-----|
|                                                                 | CA      | CL   | US   | IL   | JP   | KR   | AT   | BE   | CZ   | DK   | EE   | FI   | FR   | DE   | GR   | HU   | IS   | IE   | IT   | LV   | LT   | LU    | NL   | NO   | PL   | PT   | SK   | SI   | ES   | SE   | CH   | GB   | AU   | NZ   |     |
| Tuberculosis                                                    | 0.0     | 0.0  | 0.0  | 0.0  | 0.0  | 0.7  | 2.9  | 2.1  | 0.0  | 0.0  | 0.0  | 0.0  | 0.0  | 0.0  | 0.0  | 0.0  | 0.0  | 0.0  | 0.0  | 0.0  | 0.0  | 0.0   | 0.0  | 0.0  | 0.0  | 0.0  | 2.4  | 0.0  | 0.8  | 0.0  | 0.5  | 0.8  | 0.0  |      |     |
| Septicemia                                                      | 6.5     | 0.5  | 5.7  | 8.3  | 4.9  | 1.0  | 2.9  | 4.3  | 2.3  | 0.0  | 0.0  | 5.6  | 4.1  | 5.0  | 2.7  | 0.0  | 0.0  | 0.0  | 6.1  | 0.0  | 22.2 | 0.0   | 7.5  | 4.3  | 1.6  | 4.8  | 0.0  | 0.0  | 2.9  | 2.2  | 3.1  | 5.3  | 4.0  | 0.0  |     |
| Pneumonia                                                       | 1.9     | 4.1  | 4.6  | 6.7  | 11.6 | 5.6  | 0.0  | 4.3  | 30.2 | 8.3  | 36.4 | 0.0  | 0.5  | 5.0  | 10.8 | 4.3  | 0.0  | 4.2  | 1.3  | 0.0  | 11.1 | 0.0   | 9.6  | 4.3  | 26.6 | 2.4  | 44.4 | 0.0  | 3.7  | 10.9 | 3.1  | 6.7  | 3.2  | 11.5 |     |
| Influenza                                                       | 0.0     | 0.0  | 3.1  | 0.0  | 1.9  | 0.3  | 0.0  | 2.1  | 0.0  | 0.0  | 0.0  | 0.0  | 2.7  | 0.6  | 2.7  | 0.0  | 0.0  | 0.0  | 1.3  | 0.0  | 0.0  | 0.0   | 1.1  | 17.4 | 0.7  | 0.0  | 0.0  | 0.4  | 2.2  | 6.3  | 2.9  | 1.6  | 7.7  |      |     |
| Intestinal infections other than typhoid, diphtheria (0–14 yrs) | 0.9     | 0.5  | 1.0  | 0.0  | 1.7  | 1.4  | 0.0  | 0.0  | 2.3  | 0.0  | 0.0  | 0.0  | 2.3  | 1.2  | 0.0  | 1.4  | 0.0  | 4.2  | 0.0  | 0.0  | 0.0  | 0.0   | 1.1  | 0.0  | 0.0  | 0.0  | 0.0  | 1.2  | 0.0  | 0.0  | 1.0  | 0.0  | 7.7  |      |     |
| Diphtheria, Tetanus, Poliomyelitis                              | 0.0     | 0.0  | 0.0  | 0.0  | 0.0  | 0.0  | 0.0  | 0.0  | 0.0  | 0.0  | 0.0  | 0.0  | 0.0  | 0.0  | 0.0  | 0.0  | 0.0  | 0.0  | 0.0  | 0.0  | 0.0  | 0.0   | 0.0  | 0.0  | 0.0  | 0.0  | 0.0  | 0.0  | 0.0  | 0.0  | 0.0  | 0.0  | 0.0  | 0.0  |     |
| Whooping cough (0–14 yrs)                                       | 0.0     | 0.0  | 0.0  | 0.0  | 0.0  | 0.0  | 0.0  | 0.0  | 0.0  | 0.0  | 0.0  | 0.0  | 0.0  | 0.0  | 0.0  | 0.0  | 0.0  | 0.0  | 0.0  | 0.0  | 0.0  | 0.0   | 0.0  | 0.0  | 0.0  | 0.0  | 0.0  | 0.0  | 0.0  | 0.0  | 0.0  | 0.0  | 0.0  | 0.0  |     |
| Measles (1–14 yrs)                                              | 0.0     | 0.0  | 0.0  | 0.0  | 0.0  | 0.0  | 0.0  | 0.0  | 0.0  | 0.0  | 0.0  | 0.0  | 0.5  | 0.3  | 0.0  | 0.0  | 0.0  | 0.0  | 0.0  | 0.0  | 0.0  | 0.0   | 0.0  | 0.0  | 0.0  | 0.0  | 0.0  | 0.0  | 0.0  | 0.0  | 0.0  | 0.0  | 0.0  | 0.0  |     |
| Colorectal cancer                                               | 0.0     | 0.0  | 0.2  | 3.3  | 0.8  | 1.0  | 0.0  | 0.0  | 0.0  | 0.0  | 0.0  | 0.0  | 0.5  | 0.6  | 1.4  | 0.0  | 0.0  | 0.0  | 0.0  | 0.0  | 0.0  | 0.0   | 0.0  | 0.0  | 0.0  | 0.0  | 0.0  | 0.0  | 0.8  | 0.0  | 3.1  | 0.0  | 0.0  | 0.0  |     |
| Malignant neoplasm of skin                                      | 0.0     | 0.5  | 0.0  | 1.7  | 0.0  | 0.0  | 0.0  | 0.0  | 0.0  | 0.0  | 0.0  | 0.0  | 0.5  | 0.0  | 0.0  | 0.0  | 0.0  | 0.0  | 0.0  | 0.0  | 0.0  | 0.0   | 0.0  | 0.0  | 0.0  | 2.4  | 0.0  | 0.0  | 0.0  | 0.0  | 0.0  | 0.2  | 0.0  | 0.0  |     |
| Breast cancer                                                   | 0.0     | 0.0  | 0.0  | 0.0  | 0.0  | 0.0  | 0.0  | 0.0  | 0.0  | 0.0  | 0.0  | 0.0  | 0.0  | 0.0  | 0.0  | 0.0  | 0.0  | 0.0  | 0.0  | 0.0  | 0.0  | 0.0   | 0.0  | 0.0  | 0.0  | 0.0  | 0.0  | 0.0  | 0.0  | 0.0  | 0.0  | 0.0  | 0.0  | 0.0  |     |
| Cervical cancer and uterine cancer                              | 0.0     | 0.0  | 0.0  | 0.0  | 0.0  | 0.0  | 0.0  | 0.0  | 0.0  | 0.0  | 0.0  | 0.0  | 0.5  | 0.0  | 0.0  | 0.0  | 0.0  | 4.2  | 0.0  | 0.0  | 0.0  | 0.0   | 0.0  | 0.0  | 0.0  | 0.0  | 0.0  | 0.0  | 0.0  | 0.0  | 0.0  | 0.0  | 0.0  | 0.0  |     |
| Neoplasm of the testis                                          | 0.9     | 0.5  | 0.0  | 0.0  | 0.5  | 0.0  | 0.0  | 0.0  | 0.0  | 0.0  | 0.0  | 0.0  | 0.0  | 0.0  | 0.0  | 0.0  | 0.0  | 0.0  | 0.0  | 0.0  | 0.0  | 0.0   | 0.0  | 0.0  | 0.3  | 0.0  | 0.0  | 0.0  | 0.0  | 0.0  | 0.2  | 0.0  | 0.0  | 0.0  |     |
| Hodgkin's disease                                               | 1.9     | 0.5  | 0.6  | 0.0  | 0.0  | 0.7  | 0.0  | 0.0  | 0.0  | 0.0  | 0.0  | 0.0  | 0.5  | 0.3  | 2.7  | 0.0  | 0.0  | 0.0  | 1.3  | 0.0  | 0.0  | 0.0   | 1.1  | 0.0  | 0.3  | 0.0  | 0.0  | 0.4  | 0.0  | 3.1  | 1.0  | 0.8  | 0.0  | 0.0  |     |
| Leukemia                                                        | 34.3    | 47.8 | 23.2 | 28.3 | 30.2 | 40.4 | 23.5 | 29.8 | 4.7  | 25.0 | 18.2 | 38.9 | 37.9 | 28.1 | 40.5 | 35.5 | 66.7 | 37.5 | 46.5 | 16.7 | 22.2 | 100.0 | 29.9 | 39.1 | 20.7 | 38.6 | 7.4  | 50.0 | 41.2 | 28.3 | 34.4 | 20.2 | 26.2 | 11.5 |     |
| Thyroid disorders                                               | 0.0     | 0.0  | 0.2  | 0.0  | 0.2  | 0.0  | 0.0  | 0.0  | 0.0  | 0.0  | 0.0  | 0.0  | 0.0  | 0.0  | 0.0  | 0.0  | 0.0  | 0.0  | 0.3  | 0.0  | 0.0  | 0.0   | 0.0  | 0.0  | 0.0  | 0.0  | 0.0  | 0.0  | 0.0  | 0.0  | 0.0  | 0.0  | 0.0  | 0.0  |     |
| Diabetes mellitus                                               | 2.8     | 0.5  | 3.9  | 0.0  | 1.9  | 2.1  | 0.0  | 4.3  | 2.3  | 8.3  | 0.0  | 5.6  | 0.5  | 1.8  | 1.4  | 0.0  | 0.0  | 4.2  | 1.3  | 0.0  | 0.0  | 0.0   | 1.1  | 4.3  | 0.3  | 0.0  | 0.0  | 0.4  | 0.0  | 0.0  | 2.4  | 2.4  | 0.0  | 0.0  |     |
| Epilepsy                                                        | 11.1    | 8.1  | 7.3  | 8.3  | 6.0  | 15.3 | 17.6 | 12.8 | 18.6 | 8.3  | 18.2 | 22.2 | 13.5 | 19.5 | 2.7  | 17.0 | 33.3 | 16.7 | 5.8  | 16.7 | 0.0  | 0.0   | 18.2 | 8.7  | 12.5 | 7.2  | 7.4  | 0.0  | 5.0  | 13.0 | 9.4  | 13.0 | 13.5 | 19.2 |     |
| Rheumatic heart diseases                                        | 0.9     | 0.5  | 0.2  | 3.3  | 0.0  | 0.0  | 0.0  | 0.0  | 0.0  | 0.0  | 0.0  | 0.0  | 0.5  | 0.6  | 0.0  | 0.0  | 0.0  | 0.0  | 0.0  | 0.0  | 0.0  | 0.0   | 0.0  | 0.0  | 0.0  | 0.0  | 0.0  | 0.4  | 0.0  | 0.0  | 0.2  | 1.6  | 3.8  | 0.0  |     |
| Ischemic heart diseases: 50% of deaths                          | 0.0     | 0.3  | 0.9  | 0.0  | 0.9  | 0.7  | 0.0  | 0.0  | 0.0  | 0.0  | 9.1  | 0.0  | 0.2  | 0.0  | 0.0  | 0.7  | 0.0  | 0.0  | 0.6  | 0.0  | 0.0  | 0.0   | 1.6  | 0.0  | 0.3  | 1.2  | 0.0  | 1.5  | 0.0  | 0.0  | 0.4  | 0.0  | 0.0  | 0.0  |     |
| Cerebrovascular diseases                                        | 4.6     | 11.2 | 9.0  | 5.0  | 14.1 | 12.9 | 5.9  | 4.3  | 4.7  | 8.3  | 0.0  | 16.7 | 9.9  | 8.6  | 1.4  | 7.1  | 0.0  | 0.0  | 10.3 | 33.3 | 11.1 | 0.0   | 5.3  | 8.7  | 6.9  | 9.6  | 3.7  | 12.5 | 7.9  | 13.0 | 18.8 | 4.8  | 5.6  | 15.4 |     |
| Hypertensive diseases                                           | 0.0     | 0.5  | 0.1  | 0.0  | 0.0  | 0.0  | 0.0  | 0.0  | 0.0  | 0.0  | 0.0  | 0.0  | 0.0  | 0.0  | 0.0  | 0.0  | 0.0  | 0.0  | 0.3  | 0.0  | 0.0  | 0.0   | 0.0  | 0.0  | 0.0  | 0.0  | 0.0  | 0.4  | 0.0  | 0.0  | 0.0  | 0.0  | 0.0  | 0.0  |     |
| Nephritis and nephrosis                                         | 0.0     | 3.6  | 1.0  | 3.3  | 1.6  | 2.8  | 0.0  | 2.1  | 2.3  | 0.0  | 0.0  | 0.0  | 0.0  | 0.9  | 2.7  | 0.0  | 0.0  | 0.0  | 0.6  | 0.0  | 11.1 | 0.0   | 0.0  | 0.0  | 1.6  | 0.0  | 0.0  | 0.8  | 0.0  | 0.0  | 1.2  | 1.6  | 0.0  | 0.0  |     |
| Benign prostatic hyperplasia                                    | 0.0     | 0.0  | 0.0  | 0.0  | 0.0  | 0.0  | 0.0  | 0.0  | 0.0  | 0.0  | 0.0  | 0.0  | 0.0  | 0.0  | 0.0  | 0.0  | 0.0  | 0.0  | 0.0  | 0.0  | 0.0  | 0.0   | 0.0  | 0.0  | 0.0  | 0.0  | 0.0  | 0.0  | 0.0  | 0.0  | 0.0  | 0.0  | 0.0  | 0.0  | 0.0 |
| All respiratory diseases, excl. pneumonia/influenza (1–14 yrs)  | 12.0    | 5.1  | 21.6 | 11.7 | 11.0 | 5.9  | 2.9  | 10.6 | 11.6 | 25.0 | 0.0  | 0.0  | 10.8 | 9.2  | 5.4  | 18.4 | 0.0  | 12.5 | 11.0 | 16.7 | 0.0  | 0.0   | 12.8 | 4.3  | 5.6  | 9.6  | 14.8 | 0.0  | 13.3 | 8.7  | 9.4  | 23.8 | 23.8 | 7.7  |     |
| Peptic ulcer                                                    | 0.0     | 0.5  | 0.3  | 0.0  | 0.2  | 0.3  | 0.0  | 0.0  | 0.0  | 0.0  | 0.0  | 0.0  | 0.0  | 0.0  | 0.0  | 0.0  | 0.0  | 0.0  | 0.0  | 0.0  | 0.0  | 0.0   | 0.0  | 0.0  | 0.7  | 2.4  | 3.7  | 0.0  | 0.8  | 0.0  | 0.0  | 0.2  | 0.0  | 0.0  |     |
| Appendicitis                                                    | 0.0     | 1.0  | 0.7  | 0.0  | 0.0  | 0.0  | 0.0  | 2.1  | 4.7  | 0.0  | 0.0  | 0.0  | 0.9  | 0.0  | 0.0  | 0.0  | 0.0  | 0.0  | 0.0  | 0.0  | 0.0  | 0.0   | 0.0  | 0.0  | 0.3  | 0.0  | 0.0  | 0.4  | 0.0  | 0.0  | 2.2  | 0.8  | 0.0  | 0.0  |     |
| Abdominal hernia                                                | 0.9     | 0.0  | 0.3  | 0.0  | 0.2  | 0.0  | 0.0  | 0.0  | 0.0  | 0.0  | 0.0  | 0.0  | 0.0  | 0.0  | 0.0  | 0.0  | 0.0  | 0.0  | 0.3  | 0.0  | 0.0  | 0.0   | 0.0  | 0.0  | 0.0  | 0.0  | 0.0  | 0.0  | 0.0  | 0.2  | 0.0  | 0.0  | 0.0  | 0.0  |     |
| Cholelithiasis and cholecystitis                                | 0.0     | 0.0  | 0.0  | 0.0  | 0.0  | 0.0  | 0.0  | 0.0  | 0.0  | 0.0  | 0.0  | 0.0  | 0.0  | 0.0  | 0.0  | 0.0  | 0.0  | 0.0  | 0.3  | 0.0  | 0.0  | 0.0   | 0.0  | 0.0  | 0.0  | 0.0  | 0.0  | 0.0  | 0.0  | 0.0  | 0.0  | 0.0  | 0.0  | 0.0  | 3.8 |
| Maternal deaths                                                 | 0.0     | 0.0  | 0.3  | 0.0  | 0.0  | 0.0  | 0.0  | 0.0  | 0.0  | 0.0  | 0.0  | 0.0  | 0.0  | 0.0  | 0.0  | 0.0  | 0.0  | 0.0  | 0.0  | 0.0  | 0.0  | 0.0   | 0.0  | 0.0  | 0.0  | 0.0  | 0.0  | 0.0  | 0.0  | 0.0  | 0.0  | 0.0  | 0.0  | 0.0  |     |
| Perinatal deaths, excl. stillbirths                             | 2.8     | 1.0  | 2.3  | 0.0  | 0.6  | 0.0  | 14.7 | 2.1  | 0.0  | 8.3  | 0.0  | 0.0  | 0.0  | 3.8  | 0.0  | 0.0  | 0.0  | 0.0  | 2.9  | 0.0  | 0.0  | 0.0   | 0.0  | 0.0  | 0.3  | 0.0  | 0.0  | 0.8  | 8.7  | 0.0  | 0.7  | 1.6  | 3.8  | 0.0  |     |
| Congenital cardiovascular anomalies                             | 17.6    | 13.2 | 12.4 | 18.3 | 9.7  | 8.0  | 20.6 | 14.9 | 16.3 | 8.3  | 18.2 | 11.1 | 14.0 | 11.2 | 25.7 | 14.2 | 0.0  | 16.7 | 9.7  | 16.7 | 11.1 | 0.0   | 10.7 | 8.7  | 19.3 | 12.0 | 14.8 | 25.0 | 16.2 | 13.0 | 9.4  | 11.0 | 11.9 | 7.7  |     |
| Misadventures to patients during surgical and medical care      | 0.9     | 0.0  | 1.3  | 1.7  | 2.1  | 0.7  | 8.8  | 4.3  | 0.0  | 0.0  | 0.0  | 0.0  | 0.0  | 3.3  | 0.0  | 1.4  | 0.0  | 0.0  | 0.0  | 0.0  | 0.0  | 0.0   | 0.0  | 0.0  | 2.0  | 7.2  | 3.7  | 12.5 | 0.4  | 0.0  | 0.0  | 1.9  | 0.8  | 0.0  |     |

1  
2  
3  
4  
5  
6  
7  
8  
9  
10  
11  
12  
13  
14  
15  
16  
17  
18  
19  
20  
21  
22  
23  
24  
25  
26  
27  
28  
29  
30  
31  
32  
33  
34  
35  
36  
37  
38  
39  
40  
41  
42  
43  
44  
45  
46

For peer review only

# BMJ Open

## Amenable mortality in children in 34 OECD countries: evidence from a 15-year time trend analysis

|                                 |                                                                                                                                                                                                                                                                                                                                                                                                                                                                                                                                                                                                                                                                                                                                                                                                                                                |
|---------------------------------|------------------------------------------------------------------------------------------------------------------------------------------------------------------------------------------------------------------------------------------------------------------------------------------------------------------------------------------------------------------------------------------------------------------------------------------------------------------------------------------------------------------------------------------------------------------------------------------------------------------------------------------------------------------------------------------------------------------------------------------------------------------------------------------------------------------------------------------------|
| Journal:                        | <i>BMJ Open</i>                                                                                                                                                                                                                                                                                                                                                                                                                                                                                                                                                                                                                                                                                                                                                                                                                                |
| Manuscript ID                   | bmjopen-2018-027909.R1                                                                                                                                                                                                                                                                                                                                                                                                                                                                                                                                                                                                                                                                                                                                                                                                                         |
| Article Type:                   | Research                                                                                                                                                                                                                                                                                                                                                                                                                                                                                                                                                                                                                                                                                                                                                                                                                                       |
| Date Submitted by the Author:   | 08-Mar-2019                                                                                                                                                                                                                                                                                                                                                                                                                                                                                                                                                                                                                                                                                                                                                                                                                                    |
| Complete List of Authors:       | Gianino, Maria Michela; University of Torino, Dept. Public Health and Pediatrics<br>Lenzi, Jacopo; Alma Mater Studiorum - University of Bologna, Department of Biomedical and Neuromotor Sciences<br>Bonaudo, Marco; Università degli Studi di Torino, Department of Public Health Sciences and Pediatrics<br>Fantini, Maria Pia; University of Bologna, Department of Biomedical and Neuromotor Sciences<br>Siliquini, Roberta; University of Turin, Department of Public Health Sciences and Pediatrics<br>Ricciardi, W; Università Cattolica del Sacro Cuore Sede di Roma, Istituto di Sanità Pubblica; Fondazione Policlinico Universitario 'Agostino Gemelli' IRCCS<br>Damiani, Gianfranco; Università Cattolica del Sacro Cuore Sede di Roma, Istituto di Sanità Pubblica; Fondazione Policlinico Universitario 'Agostino Gemelli' IRCCS |
| <b>Primary Subject Heading</b>: | Public health                                                                                                                                                                                                                                                                                                                                                                                                                                                                                                                                                                                                                                                                                                                                                                                                                                  |
| Secondary Subject Heading:      | Health services research, Paediatrics                                                                                                                                                                                                                                                                                                                                                                                                                                                                                                                                                                                                                                                                                                                                                                                                          |
| Keywords:                       | International health services < HEALTH SERVICES ADMINISTRATION & MANAGEMENT, amenable mortality, child, childhood, healthcare, OECD countries                                                                                                                                                                                                                                                                                                                                                                                                                                                                                                                                                                                                                                                                                                  |
|                                 |                                                                                                                                                                                                                                                                                                                                                                                                                                                                                                                                                                                                                                                                                                                                                                                                                                                |

SCHOLARONE™  
Manuscripts

1  
2  
3 1 **Amenable mortality in children in 34 OECD countries: evidence from a 15-year time trend analysis**  
4  
5 2  
6

7 3 **Authors:**  
8

9 4 Maria Michela Gianino<sup>a</sup>, Jacopo Lenzi<sup>b</sup>, Marco Bonaudo<sup>a</sup>, Maria Pia Fantini<sup>b</sup>, Roberta Siliquini<sup>a</sup>,  
10 5 Walter Ricciardi<sup>cd</sup>, Gianfranco Damiani<sup>cd</sup>.  
11  
12 6

13  
14  
15  
16 7 **Maria Michela Gianino, Professor**

17 8 a) Department of Public Health Sciences and Pediatrics, Università di Torino

18 9 Via Santena 5 bis - 10126 Turin (Italy)

19 10 Tel #: +39(0)116705839 - Fax #: +39(0)116705889

20 11 [mariola.gianino@unito.it](mailto:mariola.gianino@unito.it)  
21  
22  
23  
24  
25  
26  
27  
28  
29

30 13 **Jacopo Lenzi, PhD**

31 14 b) Department of Biomedical and Neuromotor Sciences, Alma Mater Studiorum - Università di

32 15 Bologna

33 16 Via Ugo Foscolo 7 - 40123 Bologna (Italy)

34 17 Tel #: +39(0)512094836

35 18 [jacopo.lenzi2@unibo.it](mailto:jacopo.lenzi2@unibo.it)  
36  
37  
38  
39  
40  
41  
42  
43  
44  
45  
46  
47  
48

49 20 **Marco Bonaudo, MSN**

50 21 a) Department of Public Health Sciences and Pediatrics, Università di Torino

51 22 Via Santena 5 bis - 10126 Turin (Italy)

52 23 Tel #: +39(0)116705839 - Fax #: +39(0)116705889

53 24 [marco.bonaudo@unito.it](mailto:marco.bonaudo@unito.it)  
54  
55  
56  
57  
58  
59

60 26 **Maria Pia Fantini, MD, Professor**

1  
2  
3 27 b) Department of Biomedical and Neuromotor Sciences, Alma Mater Studiorum - Università di

4  
5 28 Bologna

6  
7 29 Via Ugo Foscolo 7 - 40123 Bologna (Italy)

8  
9 30 Tel #: +39(0)512094836

10  
11 31 [mariapia.fantini@unibo.it](mailto:mariapia.fantini@unibo.it)

12  
13  
14 32

15  
16  
17 33 **Roberta Siliquini, Professor**

18  
19 34 a) Department of Public Health Sciences and Pediatrics, Università di Torino

20  
21 35 Via Santena 5 bis - 10126 Turin (Italy)

22  
23 36 Tel #: +39(0)116705812

24  
25 37 [roberta.siliquini@unito.it](mailto:roberta.siliquini@unito.it)

26  
27  
28 38

29  
30 39 **Walter Ricciardi, MD, Professor**

31  
32 40 c) Fondazione Policlinico Universitario 'Agostino Gemelli' IRCCS, Roma, Italia

33  
34 41 Largo Agostino Gemelli 8 - 00168 Roma (Italia)

35  
36 42 Tel #: +39(0)630154396

37  
38 43 [walter.ricciardi@unicatt.it](mailto:walter.ricciardi@unicatt.it)

39  
40 44 **and**

41  
42 45 d) Istituto di Sanità Pubblica, Università Cattolica del Sacro Cuore, Roma, Italia

43  
44 46 Largo Francesco Vito 1 - 00168 Roma (Italia)

45  
46 47 Tel #: +39(0)630154396

47  
48 48 [walter.ricciardi@unicatt.it](mailto:walter.ricciardi@unicatt.it)

49  
50 49

51  
52 50 **Gianfranco Damiani MD, Professor**

53  
54 51 c) Fondazione Policlinico Universitario 'Agostino Gemelli' IRCCS, Roma, Italia

55  
56 52 Largo Agostino Gemelli 8 - 00168 Roma (Italia)

1  
2  
3 53 Tel #: +39(0)630154396  
4

5 54 [gianfranco.damiani@policlinicogemelli.it](mailto:gianfranco.damiani@policlinicogemelli.it)  
6  
7

8 55 **and**  
9

10 56 d) Istituto di Sanità Pubblica, Università Cattolica del Sacro Cuore, Roma, Italia  
11  
12 57 Largo Francesco Vito 1 - 00168 Roma (Italia)  
13

14 58 Tel #: +39(0)630154396  
15

16  
17 59 [gianfranco.damiani@unicatt.it](mailto:gianfranco.damiani@unicatt.it)  
18  
19 60  
20

21 61 **Corresponding Author:**  
22

23  
24 62 **Marco Bonaudo, MSN**  
25

26 63 a) Department of Public Health Sciences and Pediatrics, Università di Torino  
27

28 64 Via Santena 5 bis - 10126 Turin (Italy)  
29

30 65 Tel #: +39(0)116705839 - Fax #: +39(0)116705889  
31  
32

33 66 [marco.bonaudo@unito.it](mailto:marco.bonaudo@unito.it)  
34  
35 67  
36

37 68 **Words count paper: 3077**  
38

39 69 **Words count abstract: 274**  
40  
41  
42 70  
43  
44 71  
45  
46 72  
47  
48 73  
49  
50 74  
51  
52 75  
53  
54 76  
55  
56 77  
57  
58 78  
59

60 **ABSTRACT**

1  
2  
3 79 **Background.** The child mortality burden conditioned by the performance of the healthcare system  
4  
5 80 has not been well investigated. This study aimed to analyse the trends of amenable mortality rates  
6  
7  
8 81 (AMRs) in children in 34 OECD countries over the period 2001-2015.

9  
10 82 **Methods.** A time trend analysis was performed. Using data from the WHO Mortality Database and  
11  
12 83 Nolte and McKee's list, AMRs were calculated as the annual number of deaths over the population  
13  
14 84 aged  $\leq 14$  years/100,000 inhabitants. The rates were stratified by the age groups (<1, 1–4, 5–9, 10–14  
15  
16 85 years). All data were summarised by presenting the average rates for the years 2001/2005, 2006/2010,  
17  
18  
19 86 and 2011/2015.

20  
21 87 **Results.** There was a significant decline in children's AMRs in the <1-year group in all 34 OECD  
22  
23 88 countries from 2001/2005 to 2006/2010 (332.78 to 295.17/100,000; % $\Delta$  -11.30%; 95% CI -18.75%,  
24  
25  
26 89 - 3.85%) and from 2006/2010 to 2011/2015 (295.17 to 240.22/100,000; % $\Delta$  -18.62%; 95% CI -  
27  
28 90 26.53%, -10.70%), and a slow decline in the other age classes. The only cause of death that was  
29  
30 91 significantly reduced was conditions originating in the early neonatal period for the <1-year group.  
31  
32  
33 92 The age-specific distribution of causes of death did not vary significantly over the study period.

34  
35 93 **Conclusion.** The low decline in amenable mortality rates for children aged  $\geq 1$  year, the large variation  
36  
37 94 in amenable mortality rates across countries and the insufficient success in reducing mortality from  
38  
39  
40 95 all causes suggest that the health system should increase its efforts to enhance child survival.  
41  
42 96 Promoting models of co-management between primary care and subspecialty services, encouraging  
43  
44 97 high-quality healthcare and knowledge, financing universal access to healthcare, and adopting best  
45  
46  
47 98 practice guidelines might help reduce amenable child mortality.  
48  
49  
50

#### 51 100 **Strengths and limitations of this study:**

- 52 101 1. This is the first study to analyse trends in child mortality amenable to healthcare.
- 53  
54 102 2. Thirty-four OECD countries were included in the analyses to provide a thorough depiction of  
55  
56 103 amenable child mortality in high-income economies.
- 57  
58 104 3. Mortality was not disaggregated by ethnicity or socioeconomic characteristics.
- 59  
60



1  
2  
3  
4  
5  
6  
7  
8  
9  
10  
11  
12  
13  
14  
15  
16  
17  
18  
19  
20  
21  
22  
23  
24  
25  
26  
27  
28  
29  
30  
31  
32  
33  
34  
35  
36  
37  
38  
39  
40  
41  
42  
43  
44  
45  
46  
47  
48  
49  
50  
51  
52  
53  
54  
55  
56  
57  
58  
59  
60

105 4. Making international comparisons is difficult due to variations in birth registration laws and  
106 death certification practices.

107  
108 **Key words:** Amenable mortality, child, childhood, healthcare, healthcare services, OECD countries

For peer review only

## INTRODUCTION

The health of children and adolescents is an important goal for every society, both because they are vulnerable and because diseases can affect their quality of life. Measures for protecting and improving children's and adolescents' health will yield economic and social benefits beyond improved health outcomes. Indeed, young people have the potential to affect the health of future populations as well as global economic development unless timely and effective strategies are put into place.[1,2]

For the adoption of new strategies and the planning of interventions, information on the leading causes of death is essential. Many studies have analysed the mortality rates and have identified the main causes of death of children in specific countries [3] or areas.[4] Studies have demonstrated that many different factors contribute to child and adolescent mortality [5], including biological and psychosocial,[6] socioeconomic status,[7,8] environmental and behavioural factors.[9] In the landscape described, the mortality burden conditioned by the performance of the healthcare system has not been well investigated. Although there is no indicator that is able to compressively reflect the performance of the healthcare system, a suitable measurement seems to be the concept of amenable mortality.

Amenable mortality is defined as deaths that, in the light of medical knowledge and technology at the time of death, could be prevented by timely access to good quality care. The concept of mortality amenable to healthcare finds its origins in the evolution of the concept of avoidable mortality, developed by Rutstein et al., who created a list of conditions that were considered either treatable or preventable through healthcare services given the current medical knowledge and technology.[10] Rutstein was the first to introduce the term amenable mortality, differentiating between causes which are responsive to medical intervention through treatment and secondary/tertiary prevention actions (e.g., cervical cancer, hypertensive disease or appendicitis), and causes responsive to actions beyond healthcare services (preventable conditions such as lung cancer and liver cirrhosis).

1  
2  
3 135 In recent years the concept of amenable mortality has been used as a potential indicator of the  
4  
5 136 performance of healthcare systems by several countries. The amenable mortality has been chosen as  
6  
7  
8 137 indicator in the UK National Health Service Outcomes Framework for 2011-2012,[11] and in  
9  
10 138 Australian and New Zealand atlas of avoidable mortality 1997-2001 [12] or in European Community  
11  
12 139 atlas of “avoidable death”. [13] Amenable mortality indicators have also been used to report on spatial  
13  
14  
15 140 and temporal distributions and variations in health system performance across countries,[14–20] as  
16  
17 141 well as across subnational entities,[12,21–25] socio-economic status, ethnic groups and  
18  
19 142 sex.[14,24,26,27] Most of these studies did not assess amenable mortality across ages in different  
20  
21  
22 143 populations and did not focus on child and adolescent age classes.

23  
24 144 According to the World Health Organization (WHO), an estimated 6.3 million children under  
25  
26 145 the age of 15 years died in 2017 (117,000 in the OECD region). Five point four million of these  
27  
28 146 children were under the age of 5, and 2.5 million died within the first month of life. More than half  
29  
30  
31 147 of these early child deaths were due to conditions that could be prevented or treated with access to  
32  
33 148 simple, affordable interventions and were, consequently, amenable.[2]

34  
35 149 The purpose of this study was to analyse the trends of amenable child mortality rates in 34  
36  
37  
38 150 OECD countries from 2001 to 2015, and to evaluate the pattern across age classes.

39  
40 151

41

42 152

43

## 44 153 **MATERIALS AND METHODS**

45  
46

47 154

48

49 155 This descriptive study was conducted using secondary data from 34 OECD countries during the  
50  
51 156 period from 2001 to 2015. Mexico and Turkey, albeit members of the OECD, were not included in  
52  
53  
54 157 the analysis because these countries are not listed among high-income economies in the World  
55  
56 158 Development Indicators dataset (gross national income per capita  $\geq$ \$12,056 for fiscal year 2019)[28]  
57  
58 159 and had limited data availability. The mortality and population data came from the WHO Mortality  
59  
60  
160 Database,[29] which comprises deaths registered in national vital registration systems, with the

1  
2  
3 161 underlying causes of death coded according to the International Classification of Diseases; no  
4  
5  
6 162 permission is required from the WHO if data are used for non-commercial purposes. If reference  
7  
8 163 populations were not available in the WHO Mortality Database, the data were extracted from  
9  
10 164 UNdata.[30] The country-level data availability is presented in online supplementary file 1.  
11

12 165 The causes of death amenable to healthcare were selected by means of the list proposed by  
13  
14  
15 166 Nolte and McKee[14,31] and used in a working paper by the OECD to generate estimates of amenable  
16  
17 167 mortality for 31 countries.[15] This list includes a selected number of conditions which are treatable  
18  
19 168 based on the clinical effectiveness of existing medical interventions. The age limit for amenable  
20  
21 169 deaths is set at 75 years for most conditions, such as cancer and cardiovascular diseases, but the age  
22  
23  
24 170 limit for some diseases (i.e., whooping cough, measles, intestinal infections, and respiratory diseases  
25  
26 171 other than pneumonia/influenza) is set at 14 (see online supplementary file 2 for Nolte and McKee's  
27  
28  
29 172 full list). The aggregation of the causes of death operated in the WHO Mortality Database prevents  
30  
31 173 the use of the list of amenable deaths currently adopted by Eurostat.[32]  
32

33 174 For each country, the amenable mortality rates were calculated as the annual number of deaths  
34  
35 175 in the population aged 0–14 years per 100,000 inhabitants. The rates were stratified by the age groups  
36  
37 176 adopted in the WHO Mortality Database (<1, 1–4, 5–9, 10–14 years) and by the 33 disease categories  
38  
39  
40 177 defined by Gay et al.[15] Due to the instability in the estimates of the annual amenable mortality  
41  
42 178 rates, especially for small-population countries, all data were summarised by presenting the average  
43  
44  
45 179 rates for the years 2001/2005, 2006/2010 and 2011/2015. The statistical significance of the percentage  
46  
47 180 changes between these time periods was assessed by using the formula suggested by Hildebrandt et  
48  
49 181 al.[33] Data interpretation focused on the countries that showed significant percentage changes over  
50  
51  
52 182 the entire study period (i.e., both between 2001/05 and 2006/10 and between 2006/10 and 2011/15).  
53  
54 183 Differences in the ranking of age-specific causes of death between time periods were evaluated with  
55  
56 184 the Friedman test.  
57  
58  
59  
60

1  
2  
3  
4  
5  
6  
7  
8  
9  
10  
11  
12  
13  
14  
15  
16  
17  
18  
19  
20  
21  
22  
23  
24  
25  
26  
27  
28  
29  
30  
31  
32  
33  
34  
35  
36  
37  
38  
39  
40  
41  
42  
43  
44  
45  
46  
47  
48  
49  
50  
51  
52  
53  
54  
55  
56  
57  
58  
59  
60

185 All data were analysed using the Stata software package, version 15 (StataCorp. 2017. *Stata*  
186 *Statistical Software: Release 15*. College Station, TX: StataCorp LLC). The significance level was  
187 set at .05.

### 189 **Ethics statement**

190 This descriptive study involved aggregate data that exist in the public domain, where it is not possible  
191 to identify individuals from the information provided. For this reason, this research did not require  
192 ethical approval.

### 194 **Patient and public involvement**

195 Patients were not involved in this study.

## 198 **RESULTS**

### 200 **All-cause amenable child mortality rates**

201 The results of the trend analyses conducted over the five-year periods 2001/05, 2006/10 and 2011/15  
202 are presented in Figure 1 and in online supplementary file 3. The amenable mortality rate of the  
203 OECD population with <1 year dropped significantly from 2001/05 to 2006/10 (332.78 to 295.17 per  
204 100,000, % $\Delta$  = -11.3%) and from 2006/10 to 2011/15 (295.17 to 240.22 per 100,000, % $\Delta$  = -18.6%).  
205 Contrary to the OECD rate of children aged <1 year, in the population aged  $\geq$ 1 year the overall OECD  
206 rate did not decrease significantly. From 2001/05 to 2006/10 and from 2006/10 to 2011/15, the  
207 mortality rates decreased by 13.4% and 13.0%, respectively, in the 1-4 age group; by 11.9% and  
208 11.3% in the 5-9 age group; and by 13.5% and 13.1% for the 10-14 age group. In 2011/15, the OECD  
209 rate was 4.73 per 100,000 for the 1-4 age group, 2.02 per 100,000 for the 5-9 age group, and 2.16 per  
210 100,000 for the 10-14 age group.

211

## 212 Cause-specific child mortality rates

213 When we examined the distribution of cause-specific mortality rates across multiple age groups and  
 214 study periods, no statistically significant variations in the OECD population were found. The only  
 215 exception was a significant decrease in deaths in the first year of life for conditions originating in the  
 216 early neonatal period (2001/05 to 2006/10: 266.3 to 239.8 per 100,000, % $\Delta$  = -9.9%; 2006/10 to  
 217 2011/15: 239.8 to 193.8 per 100,000, % $\Delta$  = -19.2%) (see online supplementary file 4).

218 Globally, for the years 2001/05, 2006/10 and 2011/15, there were no significant differences  
 219 in the age-specific percentage distribution of causes of death [ $<1$  year: Friedman test ( $P$ ) = 0.955  
 220 (0.372); 1-4 years: 0.864 (0.607); 5-9 years: 0.470 (0.740); 10-14 years: 1.773 (0.398)]. As shown in  
 221 Table 1, the three leading causes of death by age groups over the 15-year study period were the  
 222 following: conditions originating in the early neonatal period, congenital cardiovascular anomalies,  
 223 and pneumonia for children aged  $<1$  year; congenital cardiovascular anomalies, leukaemia, and  
 224 respiratory diseases (excl. pneumonia/flu) for all other age groups.

225 **Table 1** Percentage Distribution of the Top 10 Causes of Death Amenable to Healthcare in Children in 34  
 226 OECD Countries, Years 2001/2005, 2006/2010 and 2011/2015.

| Cause of Death                                       | 2001/05         |       | 2006/10       |       | 2011/15         |       |
|------------------------------------------------------|-----------------|-------|---------------|-------|-----------------|-------|
|                                                      | Rank            | %     | Rank          | %     | Rank            | %     |
| $<1$ Year                                            | (n = 190,169.5) |       | (n = 175,008) |       | (n = 105,210.5) |       |
| Conditions originating in the early neonatal period  | #1              | 80.02 | #1            | 81.25 | #1              | 80.69 |
| Congenital cardiovascular anomalies                  | #2              | 14.38 | #2            | 13.15 | #2              | 14.55 |
| Pneumonia                                            | #3              | 1.82  | #3            | 1.53  | #3              | 1.30  |
| Septicaemia                                          | #4              | 1.50  | #4            | 1.39  | #4              | 1.04  |
| Intestinal infections other than typhoid, diphtheria | #7              | 0.27  | #5            | 0.60  | #5              | 0.72  |
| Cerebrovascular diseases                             | #6              | 0.51  | #6            | 0.60  | #6              | 0.38  |
| Nephritis and nephrosis                              | #5              | 0.54  | #7            | 0.49  | #7              | 0.25  |
| Leukaemia                                            | #8              | 0.21  | #8            | 0.26  | #8              | 0.24  |
| Epilepsy                                             | #9              | 0.17  | #9            | 0.17  | #9              | 0.23  |
| Whooping cough                                       | #11*            | 0.11  | #12*          | 0.10  | #10             | 0.19  |
| Other causes                                         | -               | 0.46  | -             | 0.46  | -               | 0.39  |
|                                                      |                 |       |               |       |                 |       |
| 1-4 Years                                            | (n = 14,438)    |       | (n = 12,738)  |       | (n = 8491.5)    |       |
| Congenital cardiovascular anomalies                  | #1              | 25.67 | #1            | 23.63 | #1              | 25.21 |
| Leukaemia                                            | #3              | 14.55 | #3            | 13.99 | #2              | 14.99 |
| All respiratory diseases, excl. pneumonia/influenza  | #2              | 15.60 | #2            | 16.79 | #3              | 14.25 |
| Pneumonia                                            | #4              | 12.35 | #4            | 12.20 | #4              | 12.24 |
| Epilepsy                                             | #7              | 5.16  | #7            | 5.50  | #5              | 7.20  |
| Septicaemia                                          | #5              | 7.57  | #5            | 8.18  | #6              | 6.88  |
| Conditions originating in the early neonatal period  | #6              | 5.59  | #6            | 5.60  | #7              | 5.06  |
| Intestinal infections other than typhoid, diphtheria | #9              | 2.45  | #9            | 3.05  | #8              | 3.98  |
| Cerebrovascular diseases                             | #8              | 3.86  | #8            | 4.13  | #9              | 3.38  |

|                                                      |                  |       |                  |       |            |       |
|------------------------------------------------------|------------------|-------|------------------|-------|------------|-------|
| Influenza                                            | #10              | 2.16  | #10              | 1.92  | #10        | 2.39  |
| Other causes                                         | -                | 5.05  | -                | 5.00  | -          | 4.42  |
|                                                      |                  |       |                  |       |            |       |
| 5–9 Years                                            | (n = 7705)       |       | (n = 6706)       |       | (n = 4541) |       |
| Leukaemia                                            | #1               | 31.72 | #1               | 28.35 | #1         | 27.31 |
| All respiratory diseases, excl. pneumonia/influenza  | #3               | 12.91 | #2               | 16.28 | #2         | 13.87 |
| Congenital cardiovascular anomalies                  | #2               | 14.91 | #3               | 13.67 | #3         | 13.12 |
| Epilepsy                                             | #5               | 7.81  | #5               | 7.86  | #4         | 10.37 |
| Pneumonia                                            | #4               | 8.58  | #4               | 7.90  | #5         | 9.12  |
| Cerebrovascular diseases                             | #6               | 6.87  | #6               | 7.13  | #6         | 6.69  |
| Septicaemia                                          | #7               | 5.15  | #7               | 5.67  | #7         | 5.26  |
| Influenza                                            | #9               | 1.66  | #8               | 2.54  | #8         | 2.97  |
| Conditions originating in the early neonatal period  | #8               | 2.25  | #9               | 2.48  | #9         | 2.80  |
| Intestinal infections other than typhoid, diphtheria | #13 <sup>†</sup> | 0.87  | #12 <sup>†</sup> | 1.25  | #10        | 2.00  |
| Other causes                                         | -                | 7.26  | -                | 6.87  | -          | 6.47  |
|                                                      |                  |       |                  |       |            |       |
| 10–14 Years                                          | (n = 9109)       |       | (n = 7579)       |       | (n = 4921) |       |
| Leukaemia                                            | #1               | 31.30 | #1               | 30.01 | #1         | 30.24 |
| All respiratory diseases, excl. pneumonia/influenza  | #3               | 13.66 | #2               | 15.28 | #2         | 13.66 |
| Congenital cardiovascular anomalies                  | #2               | 14.13 | #3               | 12.17 | #3         | 12.62 |
| Epilepsy                                             | #5               | 7.73  | #5               | 7.89  | #4         | 10.36 |
| Cerebrovascular diseases                             | #4               | 8.12  | #4               | 8.99  | #5         | 9.08  |
| Pneumonia                                            | #6               | 7.59  | #6               | 6.73  | #6         | 7.27  |
| Septicaemia                                          | #7               | 4.17  | #7               | 4.92  | #7         | 4.29  |
| Diabetes mellitus                                    | #8               | 2.49  | #8               | 2.31  | #8         | 1.97  |
| Influenza                                            | #11 <sup>‡</sup> | 1.15  | #9               | 2.15  | #9         | 1.77  |
| Conditions originating in the early neonatal period  | #10              | 1.57  | #11 <sup>‡</sup> | 1.78  | #10        | 1.52  |
| Other causes                                         | -                | 8.09  | -                | 7.78  | -          | 7.21  |

\* Abdominal hernia was ranked #10 in 2001/05 (0.17%) and 2006/10 (0.13%).

<sup>†</sup> Nephritis and nephrosis were ranked #10 in 2001/05 (1.60%) and 2006/10 (1.69%).

<sup>‡</sup> Nephritis and nephrosis were ranked #9 in 2001/05 (1.79%) and #10 in 2006/10 (1.91%).

### Country-specific amenable child mortality rates

As shown in Figure 1 and online supplementary file 3, the amenable mortality rate for the population aged <1 year dropped significantly over the entire study period in 15 countries (United States, Israel, Japan, South Korea, Czechia, Estonia, Germany, Italy, Latvia, Hungary, Poland, Spain, Austria, United Kingdom and Australia). In addition to the decrease in conditions originating in the early neonatal period, other causes contributed to a significant reduction in mortality for some of these countries: septicaemia, pneumonia and nephritis/nephrosis in the United States, septicaemia in Poland, and congenital cardiovascular anomalies in Japan and Spain. See online supplementary file 4 for country-specific and cause-specific mortality rates in the <1-year population.

Although the overall OECD rate did not decrease significantly in the population aged  $\geq 1$  year, some country-specific data exhibited significant trends (Figure 1). However, no country showed a significant linear decline in mortality over the entire study period for all age groups (Figure 1).

243

**Figure 1** Yearly Amenable Mortality Rates (Per 100,000) for Ages <1 (a), 1–4 (b), 5–9 (c) and 10–14 (d) in 34 OECD Countries, 2001/2005, 2006/2010 and 2011/2015 (See Online Supplementary File 1 for Country-Level Data Availability)

\* Percentage decrease is statistically significant ( $P < .05$ ).

*Abbreviations:* CA, Canada; CL, Chile; US, United State of America; IL, Israel; JP, Japan; KR, Republic of Korea; AT, Austria; BE, Belgium; CZ, Czechia; DK, Denmark; EE, Estonia; FI, Finland; FR, France; DE, Germany; GR, Greece; HU, Hungary; IS, Iceland; IE, Ireland; IT, Italy; LV, Latvia; LT, Lithuania; LU, Luxembourg; NL, Netherlands; NO, Norway; PL, Poland; PT, Portugal; SK, Slovakia; SI, Slovenia; ES, Spain; SE, Sweden; CH, Switzerland; GB, United Kingdom; AU, Australia; NZ, New Zealand.

## DISCUSSION

In this time trend analysis, we found a significant decline in amenable child mortality rates for the <1-year age group in the 34 OECD countries between 2001/05 and 2011/15, and a slow decline in the other age groups. These results confirm the trend shown by previous studies conducted on six OECD countries that had been selected to provide a variety of forms of healthcare delivery between 1956 and 1980,[21] and highlight that policies to reduce amenable mortality rates are still needed, even in settings where the quality of medical services and resources is high.

These results are driven by the fact that the only significantly reduced cause of death was conditions originating in the early neonatal period in the <1-year group. Surprisingly, the decline was not more pronounced among countries with higher mortality in 2001/05, indicating that continued gains in child survival occurred both in low- and high-mortality countries. The most representative countries are Japan, which showed an improvement in its performance despite starting from low values in 2001/05, and Hungary and the US, which showed high amenable mortality rates in 2001/05.

The results concerning country-specific amenable child mortality rates showed that the reductions in the age-specific rates were not evenly distributed across OECD countries. There was not a single cause for which the age-specific mortality rates declined in the countries studied, and the success in reducing mortality rates was not consistent for all causes. These achievements corroborate another of our results, highlighting that the causal distribution of the age-specific mortality rates did not vary over the period examined and that, namely, the conditions originating in the early neonatal period, congenital cardiovascular anomalies, pneumonia, leukaemia, and all respiratory diseases



1  
2  
3 275 (excl. pneumonia/influenza) were consistently top-ranked. Because these are the main causes related  
4  
5 276 to chronic disorders and pathologies that require acute care delivered quickly, our results suggest that  
6  
7  
8 277 the models of care for children should be revised. Sidebotham has argued that child diseases might  
9  
10 278 broadly be divided into chronic (e.g., leukaemia) and acute diseases (e.g., pneumonia), and that a  
11  
12 279 single model cannot be proposed but each needs a different, albeit interconnected, health system  
13  
14  
15 280 solution.[5]

16  
17 281 Wolfe [34] highlights that the presence of children with chronic disorders requires substantial  
18  
19 282 changes from a hospital-centric model to a model in which primary care and secondary care providers  
20  
21 283 and public health services work closely together. Models of co-management are essential to promote  
22  
23  
24 284 ongoing communication and coordination between primary care and subspecialty services. It would  
25  
26 285 be inefficient for subspecialists to provide primary care, and ineffective for primary care providers to  
27  
28  
29 286 attempt to stay abreast of the latest therapies for chronic diseases. Because the majority of chronic  
30  
31 287 illness care is performed within the primary care setting and because primary care physicians spend  
32  
33 288 a considerable amount of time treating chronic illness, primary care should play a central role in the  
34  
35 289 overall coordination and continuity of people's care providing greater access to specialists and more  
36  
37  
38 290 timely follow-up care after emergency room visits.[35] The few studies evaluating this new approach  
39  
40 291 to work showed an improvement in child survival [36–38], and thus traced a possible path to improve  
41  
42 292 amenable mortality from chronic diseases.

43  
44 293 Sidebotham and Mackenbach judge as determinants of amenable mortality in acute diseases  
45  
46  
47 294 the universal access to healthcare and the presence of professionals with appropriate training.[5,18]  
48  
49 295 The relevance of access may at least partially explain our results in some countries. For example, in  
50  
51 296 Chile, where the mortality rate of pneumonia was consistently high for the <1-year group, the  
52  
53  
54 297 healthcare system replicates class inequalities. Studies have identified and tracked several important  
55  
56 298 inequalities in the burden of infant mortality for infectious diseases by socioeconomic level in Chile,  
57  
58 299 showing that this gap is discriminatory because disadvantaged households underutilise healthcare  
59  
60 300 services (due to social or economic exclusion).[39,40] In Slovakia, where also the mortality rate of

1  
2  
3 301 pneumonia was high for the <1-year group, social health insurance system formally covers all  
4  
5 302 residents and has a benefit package that all insurance companies must provide for their insured. In  
6  
7  
8 303 theory, the insurance system is thus designed to provide everybody with the same benefit package,  
9  
10 304 regardless of their health status, ability to pay or place of residence. In practice, coverage varies across  
11  
12 305 the country, mainly because the supply of human resources (especially specialists and general  
13  
14 306 practitioners [GPs]) is not adequate in all regions and districts, and sometimes providers are simply  
15  
16  
17 307 not available.[41]

18  
19 308 The access to healthcare professionals with adequate training looks at the models of first  
20  
21 309 contact between patients and clinicians and on their expertise. Although an international debate is  
22  
23  
24 310 open on the best pattern of paediatric primary care among a paediatrician-based system, a combined  
25  
26 311 system or a system based on GPs/family doctors,[42] some authors highlight the importance of  
27  
28 312 primary care paediatricians, especially because primary care paediatricians who look after children  
29  
30  
31 313 are likely to have more professional training and competencies than GPs, who often, receiving an  
32  
33 314 insufficient or not existing or non-mandatory training, do not have capabilities to diagnose and treat  
34  
35 315 a child in effective times.[34,43,44]

36  
37 316 Supported by the specialised literature, the availability of high-quality healthcare and  
38  
39  
40 317 knowledge and the use of best practice guidelines are also determinants of amenable mortality.[5,18]  
41  
42 318 These determinants provide one possible explanation for our results, in particular for the reduction in  
43  
44  
45 319 mortality by conditions originating in the early neonatal period. Several lines of evidence support the  
46  
47 320 hypothesis that neonatal intensive care has resulted in decreased mortality. Marked declines in  
48  
49 321 neonatal and infant mortality rates are coincident with the introduction and progressive development  
50  
51 322 of neonatal intensive care [45,46] and with specific neonatal intensive therapeutic improvements.[47–  
52  
53  
54 323 50] The second line of evidence regarding the effect of neonatal intensive care on infant mortality is  
55  
56 324 the observation that low birth weight infants born in hospitals with tertiary level neonatal intensive  
57  
58 325 care units have lower mortality rates than infants born in hospitals without such units. [51,52] Finally,  
59  
60

1  
2  
3  
4  
5  
6  
7  
8  
9  
10  
11  
12  
13  
14  
15  
16  
17  
18  
19  
20  
21  
22  
23  
24  
25  
26  
27  
28  
29  
30  
31  
32  
33  
34  
35  
36  
37  
38  
39  
40  
41  
42  
43  
44  
45  
46  
47  
48  
49  
50  
51  
52  
53  
54  
55  
56  
57  
58  
59  
60

326 a third line of evidence referring to improving high-risk obstetric care has been associated with  
327 decreases in neonatal mortality.[46,53]

328 Variations in child mortality exist even in countries where high-quality healthcare is available.  
329 Part of this variation may be due to a failure in implementing treatment protocols or evidence-based  
330 best practices tailored with the local conditions. This suggestion may provide some explanation of  
331 the mortality decrease in some countries, such as Hungary and Japan, which have supported the  
332 introduction of evidence-based protocols on routine newborn care and have trained nursery staff  
333 members on the protocols.[54,55]

334 Our study has the same limitations as all studies that use secondary data. It is undeniable that  
335 international variations in birth registration laws and practices and the process of death certification  
336 have the potential to bias the international comparisons of child mortality. Additionally, international  
337 comparisons of mortality rates are confounded by the various ways in which countries classify  
338 preterm infants near the threshold of viability.[56–58] Considering these issues, our study only  
339 evaluates the trend of amenable mortality rates, and a comparison analysis was not performed. Also,  
340 although much of the literature assessing the contribution of healthcare to health focuses on mortality  
341 data, data on children may be of limited value because the number of deaths is small, making  
342 interpretation difficult. However, we believe that the small numbers were mitigated by the fact that  
343 our study analysed the rates and trajectories of multiple countries over a 15-year time period. Another  
344 limitation is that our analysis did not account for mortality disparities within countries that were  
345 attributable to ethnicity, race, socioeconomic status or geographic residence, since our data sources  
346 did not this information. Evidence from the US, for example, showed higher levels of amenable  
347 mortality among people disadvantaged in terms of race or socioeconomic status.[59,60] Considering  
348 that the perinatal mortality of the US has a prevailing effect on premature births and that striking  
349 racial disparities persist, with African Americans exhibiting higher rates of preterm delivery than any  
350 other major racial/ethnic group,[61] potentially large variations within populations may be concealed.  
351 Lastly, our study is based on the definition of amenable death in its original sense of mortality

1  
2  
3  
4  
5  
6  
7  
8  
9  
10  
11  
12  
13  
14  
15  
16  
17  
18  
19  
20  
21  
22  
23  
24  
25  
26  
27  
28  
29  
30  
31  
32  
33  
34  
35  
36  
37  
38  
39  
40  
41  
42  
43  
44  
45  
46  
47  
48  
49  
50  
51  
52  
53  
54  
55  
56  
57  
58  
59  
60

352 responsive to medical intervention through treatment, although several countries, such as UK, Canada  
353 and Australia, have broadened definitions for their avoidable mortality indicators to include deaths  
354 from conditions avoidable through primary prevention. This broadened definition suggests that not  
355 only the models of care for children should be revised but also that policies must be adopted in order  
356 to prevent specific causes of death before the point of reaching the healthcare system. These policies  
357 include population health interventions such as the obligation of physical activity during adolescence  
358 in schools, or the taxation of tobacco and sugar-sweetened beverages.

359 Some preliminary conclusions can be drawn from this study. Over the 15-year period from  
360 2001 to 2015, the amenable mortality rate in <1-year-olds progressively declined in most OECD  
361 countries. Second, OECD countries had success in reducing mortality from conditions originating in  
362 the early neonatal period. Lastly, the low decline in amenable mortality rates for children aged  $\geq 1$   
363 year, the high variation in amenable mortality rates across countries and the insufficient success in  
364 reducing mortality from all causes suggest that the health system should increase its efforts to improve  
365 health outcomes for children.

1  
2  
3 366 **DECLARATIONS**

4  
5 367 **Ethics approval and consent to participate**

6  
7  
8 368 Not applicable.

9  
10 369 **Availability of data and materials**

11  
12 370 The datasets used and/or analysed during the current study are available from the corresponding  
13  
14 author on reasonable request.

15 371  
16  
17 372 **Competing interests**

18  
19 373 The authors declare that they have no competing interests.

20  
21 374 **Funding**

22  
23  
24 375 This research received no specific grant from any funding agency in the public, commercial or not-  
25  
26 376 for-profit sectors.

27  
28 377 **Acknowledgements**

29  
30 378 Data for this study came from the World Health Organization. All analyses, interpretations and  
31  
32 conclusions are credited to the authors of this study, not to the World Health Organization.

33 379  
34  
35 380 **Author Contributions**

36  
37 381 MMG and GD formulated the research goals and supervised the research activity; MMG, GD, JL  
38  
39 defined the design of the methodology; MMG wrote the article; RS, WR and MPF revised the  
40 382 article; MB collected the data and managed the database; JL utilised statistical techniques to analyse  
41  
42 383 the study data.  
43  
44 384

45  
46  
47 385 All authors have read and approved the manuscript.

48  
49  
50  
51  
52  
53  
54  
55  
56  
57  
58  
59  
60

386 **REFERENCES**

- 387 1 Blum RW, Nelson-Mmari K. The health of young people in a global context. *J Adolesc Health*  
388 *Off Publ Soc Adolesc Med* 2004;**35**:402–18. doi:10.1016/j.jadohealth.2003.10.007
- 389 2 WHO. Children: reducing mortality. [http://www.who.int/news-room/fact-sheets/detail/children-](http://www.who.int/news-room/fact-sheets/detail/children-reducing-mortality)  
390 [reducing-mortality](http://www.who.int/news-room/fact-sheets/detail/children-reducing-mortality) (accessed 3 Oct 2018).
- 391 3 Fraser J, Sidebotham P, Frederick J, *et al.* Learning from child death review in the USA, England,  
392 Australia, and New Zealand. *Lancet Lond Engl* 2014;**384**:894–903. doi:10.1016/S0140-  
393 6736(13)61089-2
- 394 4 Kyu HH, Stein CE, Pinto CB, *et al.* Causes of death among children aged 5–14 years in the WHO  
395 European Region: a systematic analysis for the Global Burden of Disease Study 2016. *Lancet*  
396 *Child Adolesc Health* 2018;**2**:321–37. doi:10.1016/S2352-4642(18)30095-6
- 397 5 Sidebotham P, Fraser J, Covington T, *et al.* Understanding why children die in high-income  
398 countries. *The Lancet* 2014;**384**:915–27. doi:10.1016/S0140-6736(14)60581-X
- 399 6 Alio AP, Richman AR, Clayton HB, *et al.* An ecological approach to understanding black-white  
400 disparities in perinatal mortality. *Matern Child Health J* 2010;**14**:557–66. doi:10.1007/s10995-  
401 009-0495-9
- 402 7 Gakidou E, Cowling K, Lozano R, *et al.* Increased educational attainment and its effect on child  
403 mortality in 175 countries between 1970 and 2009: a systematic analysis. *Lancet Lond Engl*  
404 2010;**376**:959–74. doi:10.1016/S0140-6736(10)61257-3
- 405 8 Lightfoot TJ, Johnston WT, Simpson J, *et al.* Survival from childhood acute lymphoblastic  
406 leukaemia: the impact of social inequality in the United Kingdom. *Eur J Cancer* 2012;**48**:263–9.  
407 doi:10.1016/j.ejca.2011.10.007
- 408 9 Gore FM, Bloem PJN, Patton GC, *et al.* Global burden of disease in young people aged 10-24  
409 years: a systematic analysis. *Lancet Lond Engl* 2011;**377**:2093–102. doi:10.1016/S0140-  
410 6736(11)60512-6

- 1  
2  
3 411 10 Rutstein DD, Berenberg W, Chalmers TC, *et al.* Measuring the quality of medical care. A clinical  
4  
5 412 method. *N Engl J Med* 1976;**294**:582–8. doi:10.1056/NEJM197603112941104  
6  
7  
8 413 11 Department of Health. The NHS Outcomes Framework 2011/12.  
9  
10 414 2010. [https://assets.publishing.service.gov.uk/government/uploads/system/uploads/attachment\\_d](https://assets.publishing.service.gov.uk/government/uploads/system/uploads/attachment_data/file/213789/dh_123138.pdf)  
11  
12 415 [ata/file/213789/dh\\_123138.pdf](https://assets.publishing.service.gov.uk/government/uploads/system/uploads/attachment_data/file/213789/dh_123138.pdf)  
13  
14  
15 416 12 Page A, New Zealand, University of Adelaide, editors. *Australian and New Zealand atlas of*  
16  
17 417 *avoidable mortality*. Adelaide, S. Aust.: : Public Health Information Development Unit,  
18  
19 418 University of Adelaide 2006.  
20  
21  
22 419 13 Holland WW. European Community atlas of “avoidable death.” 1991.  
23  
24 420 14 Nolte E, McKee CM. Measuring the health of nations: updating an earlier analysis. *Health Aff*  
25  
26 421 *Proj Hope* 2008;**27**:58–71. doi:10.1377/hlthaff.27.1.58  
27  
28  
29 422 15 Gay JG, Paris V, Devaux M, *et al.* Mortality Amenable to Health Care in 31 OECD Countries:  
30  
31 423 estimates and methodological Issues. Published Online First: 31 January 2011.  
32  
33 424 doi:<https://doi.org/10.1787/5kgj35f9f8s2-en>  
34  
35 425 16 Treurniet H, Boshuizen H, Harteloh P. Avoidable mortality in Europe (1980–1997): a comparison  
36  
37 426 of trends. *J Epidemiol Community Health* 2004;**58**:290–5. doi:10.1136/jech.2002.006452  
38  
39  
40 427 17 Nolte E, McKee M. Variations in amenable mortality--trends in 16 high-income nations. *Health*  
41  
42 428 *Policy Amst Neth* 2011;**103**:47–52. doi:10.1016/j.healthpol.2011.08.002  
43  
44  
45 429 18 Mackenbach JP, Hoffmann R, Khoshaba B, *et al.* Using “amenable mortality” as indicator of  
46  
47 430 healthcare effectiveness in international comparisons: results of a validation study. *J Epidemiol*  
48  
49 431 *Community Health* 2013;**67**:139–46. doi:10.1136/jech-2012-201471  
50  
51  
52 432 19 Mackenbach JP, Bouvier-Colle MH, Jouglu E. “Avoidable” mortality and health services: a  
53  
54 433 review of aggregate data studies. *J Epidemiol Community Health* 1990;**44**:106–11.  
55  
56 434 20 Gianino MM, Lenzi J, Muça A, *et al.* Declining Amenable Mortality: Time Trend (2000-2013)  
57  
58 435 and Geographic Area Analysis. *Health Serv Res* 2017;**52**:1908–27. doi:10.1111/1475-  
59  
60 436 6773.12563

1

2

- 3 437 21 Charlton JR, Velez R. Some international comparisons of mortality amenable to medical  
4  
5 438 intervention. *Br Med J Clin Res Ed* 1986;**292**:295–301.
- 7  
8 439 22 James PD, Manuel DG, Mao Y. Avoidable mortality across Canada from 1975 to 1999. *BMC*  
9  
10 440 *Public Health* 2006;**6**:137. doi:10.1186/1471-2458-6-137
- 12 441 23 Pampalon R. Avoidable mortality in Québec and its regions. *Soc Sci Med* 1993;**37**:823–31.  
13  
14 442 doi:10.1016/0277-9536(93)90376-F
- 16  
17 443 24 Piers LS, Carson NJ, Brown K, *et al*. Avoidable mortality in Victoria between 1979 and 2001.  
18  
19 444 *Aust N Z J Public Health* 2007;**31**:5–12.
- 21 445 25 Fantini MP, Lenzi J, Franchino G, *et al*. Amenable mortality as a performance indicator of Italian  
22  
23 446 health-care services. *BMC Health Serv Res* 2012;**12**:310. doi:10.1186/1472-6963-12-310
- 25  
26 447 26 Tobias M, Jackson G. Avoidable mortality in New Zealand, 1981-97. *Aust N Z J Public Health*  
27  
28 448 2001;**25**:12–20. doi:10.1111/j.1467-842X.2001.tb00543.x
- 30  
31 449 27 Schoenbaum SC, Schoen C, Nicholson JL, *et al*. Mortality amenable to health care in the United  
32  
33 450 States: The roles of demographics and health systems performance. *J Public Health Policy*  
34  
35 451 2011;**32**:407–29.
- 37  
38 452 28 World Bank. World Development Indicators | DataBank.  
39  
40 453 2018.<http://databank.worldbank.org/data/reports.aspx?source=world-development-indicators>  
41  
42 454 (accessed 3 Oct 2018).
- 44  
45 455 29 World Health Organization. WHO Mortality Database.  
46  
47 456 2018.[http://www.who.int/healthinfo/mortality\\_data/en/](http://www.who.int/healthinfo/mortality_data/en/) (accessed 3 Oct 2018).
- 48  
49 457 30 United Nations. Demographic Statistics Database.  
50  
51 458 2018.<http://data.un.org/Data.aspx?d=POP&f=tableCode%3A22> (accessed 3 Oct 2018).
- 53  
54 459 31 Nolte E, McKee M. *Does health care save lives? Avoidable mortality revisited*. The Nuffield  
55  
56 460 Trust 2004. <http://researchonline.lshtm.ac.uk/15535/> (accessed 3 Oct 2018).
- 57  
58 461 32 Eurostat. Amenable and preventable deaths of residents.  
59  
60 462 [https://ec.europa.eu/eurostat/web/products-datasets/-/hlth\\_cd\\_apr](https://ec.europa.eu/eurostat/web/products-datasets/-/hlth_cd_apr) (accessed 3 Oct 2018).



- 1  
2  
3 463 33 Hildebrandt M, Bender R, Gehrman U, *et al.* Calculating confidence intervals for impact  
4  
5 464 numbers. *BMC Med Res Methodol* 2006;**6**:32. doi:10.1186/1471-2288-6-32  
6  
7  
8 465 34 Wolfe I, Thompson M, Gill P, *et al.* Health services for children in western Europe. *Lancet Lond*  
9  
10 466 *Engl* 2013;**381**:1224–34. doi:10.1016/S0140-6736(12)62085-6  
11  
12 467 35 Expert Panel on Effective Ways of Investing in Health. Definition of a frame of Reference in  
13  
14 468 relation to Primary Care with a special emphasis on Financing Systems and Referral Systems.  
15  
16  
17 469 2014.[https://ec.europa.eu/health/expert\\_panel/sites/expertpanel/files/004\\_definitionprimarycare](https://ec.europa.eu/health/expert_panel/sites/expertpanel/files/004_definitionprimarycare_en.pdf)  
18  
19 470 [\\_en.pdf](https://ec.europa.eu/health/expert_panel/sites/expertpanel/files/004_definitionprimarycare_en.pdf) (accessed 2 Mar 2019).  
20  
21  
22 471 36 Adams J, Woods E. Redesign of chronic illness care in children and adolescents. *Curr Opin*  
23  
24 472 *Pediatr* 2016;**28**:428–33. doi:10.1097/MOP.0000000000000368  
25  
26 473 37 Britto MT, Vockell A-LB, Munafo JK, *et al.* Improving outcomes for underserved adolescents  
27  
28 474 with asthma. *Pediatrics* 2014;**133**:e418-427. doi:10.1542/peds.2013-0684  
29  
30  
31 475 38 Mangione-Smith R, Schonlau M, Chan KS, *et al.* Measuring the effectiveness of a collaborative  
32  
33 476 for quality improvement in pediatric asthma care: does implementing the chronic care model  
34  
35 477 improve processes and outcomes of care? *Ambul Pediatr Off J Ambul Pediatr Assoc* 2005;**5**:75–  
36  
37 478 82. doi:10.1367/A04-106R.1  
38  
39  
40 479 39 Hertel-Fernandez AW, Giusti AE, Sotelo JM. The Chilean infant mortality decline: improvement  
41  
42 480 for whom? Socioeconomic and geographic inequalities in infant mortality, 1990-2005. *Bull*  
43  
44 481 *World Health Organ* 2007;**85**:798–804.  
45  
46  
47 482 40 Rodrigo A, van der Veer R, Vermeer HJ, *et al.* From foundling homes to day care: a historical  
48  
49 483 review of childcare in Chile. *Cad Saúde Pública*;**30**:461–72.  
50  
51  
52 484 41 OECD. State of Health in the EU Slovak Republic: Country Health Profile 2017 - European  
53  
54 485 Observatory on Health Systems and Policies. 2017.  
55  
56 486 42 Katz M, Rubino A, Collier J, *et al.* Demography of pediatric primary care in Europe: delivery of  
57  
58 487 care and training. *Pediatrics* 2002;**109**:788–96.  
59  
60

1  
2  
3  
4  
5  
6  
7  
8  
9  
10  
11  
12  
13  
14  
15  
16  
17  
18  
19  
20  
21  
22  
23  
24  
25  
26  
27  
28  
29  
30  
31  
32  
33  
34  
35  
36  
37  
38  
39  
40  
41  
42  
43  
44  
45  
46  
47  
48  
49  
50  
51  
52  
53  
54  
55  
56  
57  
58  
59  
60

- 488 43 Pearson GA, Ward-Platt M, Harnden A, *et al.* Why children die: avoidable factors associated with  
489 child deaths. *Arch Dis Child* 2011;**96**:927–31. doi:10.1136/adc.2009.177071
- 490 44 van Esso D, del Torso S, Hadjipanayis A, *et al.* Paediatric primary care in Europe: variation  
491 between countries. *Arch Dis Child* 2010;**95**:791–5. doi:10.1136/adc.2009.178459
- 492 45 Williams RL, Chen PM. Identifying the Sources of the Recent Decline in Perinatal Mortality  
493 Rates in California. *N Engl J Med* 1982;**306**:207–14. doi:10.1056/NEJM198201283060404
- 494 46 Richardson DK, Gray JE, Gortmaker SL, *et al.* Declining severity adjusted mortality: evidence  
495 of improving neonatal intensive care. *Pediatrics* 1998;**102**:893–9.
- 496 47 Horbar JD, Wright LL, Soll RF, *et al.* A multicenter randomized trial comparing two surfactants  
497 for the treatment of neonatal respiratory distress syndrome. National Institute of Child Health and  
498 Human Development Neonatal Research Network. *J Pediatr* 1993;**123**:757–66.
- 499 48 Vermont-Oxford Neonatal Network. A multicenter, randomized trial comparing synthetic  
500 surfactant with modified bovine surfactant extract in the treatment of neonatal respiratory distress  
501 syndrome. *Pediatrics* 1996;**97**:1–6.
- 502 49 Clark RH, Yoder BA, Sell MS. Prospective, randomized comparison of high-frequency  
503 oscillation and conventional ventilation in candidates for extracorporeal membrane oxygenation.  
504 *J Pediatr* 1994;**124**:447–54.
- 505 50 Rastogi A, Akintorin SM, Bez ML, *et al.* A Controlled Trial of Dexamethasone to Prevent  
506 Bronchopulmonary Dysplasia in Surfactant-treated Infants. *Pediatrics* 1996;**98**:204–10.
- 507 51 Phibbs CS, Baker LC, Caughey AB, *et al.* Level and volume of neonatal intensive care and  
508 mortality in very-low-birth-weight infants. *N Engl J Med* 2007;**356**:2165–75.  
509 doi:10.1056/NEJMsa065029
- 510 52 Paneth N. Technology at birth. *Am J Public Health* 1990;**80**:791–2.
- 511 53 Alfirevic Z, Neilson JP. Doppler ultrasonography in high-risk pregnancies: systematic review  
512 with meta-analysis. *Am J Obstet Gynecol* 1995;**172**:1379–87.

- 1  
2  
3 513 54 Kuchna D, Hovsepyan A, Leonard S. Preventing Newborn Deaths In Romania And Hungary.  
4  
5 514 *Health Aff (Millwood)* 2017;**36**:1160–1160. doi:10.1377/hlthaff.2017.0382  
6  
7  
8 515 55 Maeda K. Progress of Perinatal Medicine in Japan. *J Health Med Inform* 2013;**s11**.  
9  
10 516 doi:10.4172/2157-7420.S11-002  
11  
12 517 56 Kramer MS, Platt RW, Yang H, *et al*. Registration artifacts in international comparisons of infant  
13  
14 mortality. *Paediatr Perinat Epidemiol* 2002;**16**:16–22. doi:10.1046/j.1365-3016.2002.00390.x  
15 518  
16  
17 519 57 Joseph KS, Liu S, Rouleau J, *et al*. Influence of definition based versus pragmatic birth  
18  
19 520 registration on international comparisons of perinatal and infant mortality: population based  
20  
21 521 retrospective study. *The BMJ* 2012;**344**. doi:10.1136/bmj.e746  
22  
23  
24 522 58 Mohangoo AD, Blondel B, Gissler M, *et al*. International Comparisons of Fetal and Neonatal  
25  
26 523 Mortality Rates in High-Income Countries: Should Exclusion Thresholds Be Based on Birth  
27  
28 524 Weight or Gestational Age? *PLOS ONE* 2013;**8**:e64869. doi:10.1371/journal.pone.0064869  
29  
30  
31 525 59 Schwartz E, Kofie VY, Rivo M, *et al*. Black/white comparisons of deaths preventable by medical  
32  
33 526 intervention: United States and the District of Columbia 1980-1986. *Int J Epidemiol*  
34  
35 527 1990;**19**:591–8. doi:10.1093/ije/19.3.591  
36  
37  
38 528 60 Macinko J, Elo IT. Black–white differences in avoidable mortality in the USA, 1980–2005. *J*  
39  
40 529 *Epidemiol Community Health* 2009;**63**:715–21. doi:10.1136/jech.2008.081141  
41  
42 530 61 Riddell CA, Harper S, Kaufman JS. Trends in Differences in US Mortality Rates Between Black  
43  
44 531 and White Infants. *JAMA Pediatr* 2017;**171**:911–3. doi:10.1001/jamapediatrics.2017.1365  
45  
46  
47 532  
48  
49  
50  
51  
52  
53  
54  
55  
56  
57  
58  
59  
60

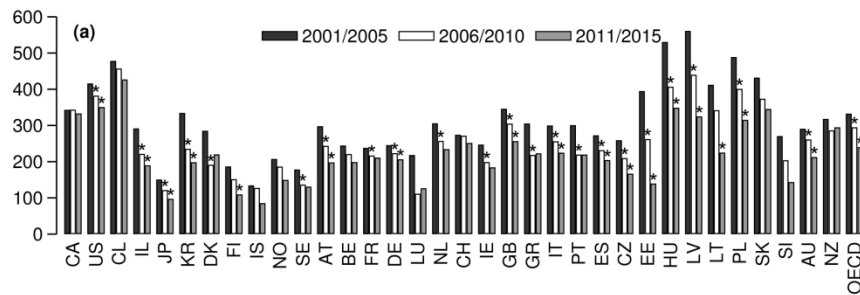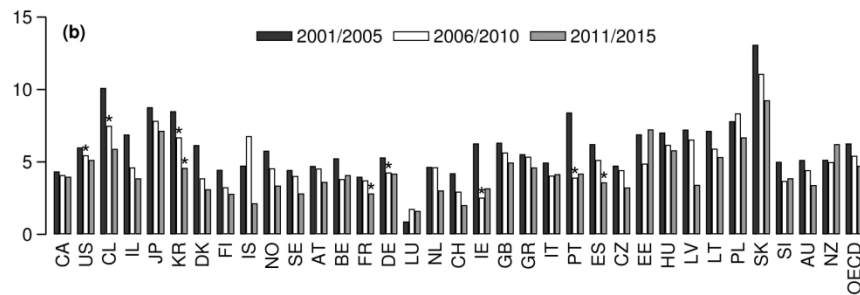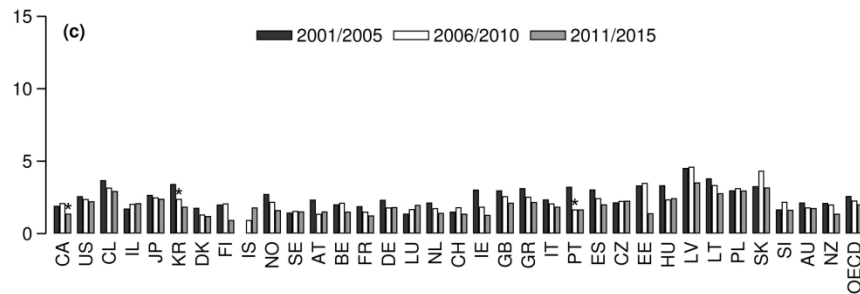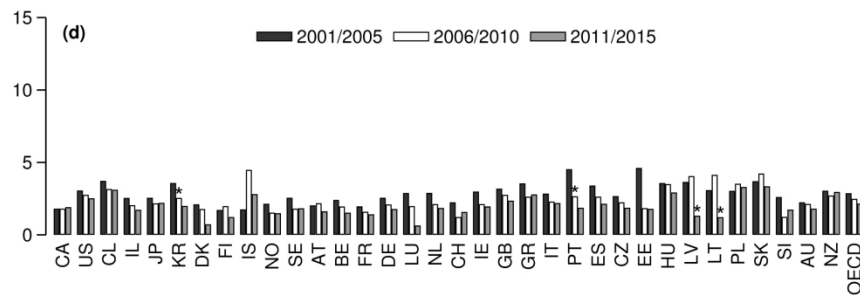

\* Percentage decrease is statistically significant (P<.05).

Abbreviations: CA, Canada; CL, Chile; US, United State of America; IL, Israel; JP, Japan; KR, Republic of Korea; AT, Austria; BE, Belgium; CZ, Czechia; DK, Denmark; EE, Estonia; FI, Finland; FR, France; DE, Germany; GR, Greece; HU, Hungary; IS, Iceland; IE, Ireland; IT, Italy; LV, Latvia; LT, Lithuania; LU, Luxembourg; NL, Netherlands; NO, Norway; PL, Poland; PT, Portugal; SK, Slovakia; SI, Slovenia; ES, Spain; SE, Sweden; CH, Switzerland; GB, United Kingdom; AU, Australia; NZ, New Zealand.

203x279mm (300 x 300 DPI)

**Table 1** Data Availability for the 34 OECD Countries (0 “Not Available”/1 “Available”)

| Country                   | Year      |           |           |           |           |           |           |           |           |           |           |           |           |           |           | Total      |
|---------------------------|-----------|-----------|-----------|-----------|-----------|-----------|-----------|-----------|-----------|-----------|-----------|-----------|-----------|-----------|-----------|------------|
|                           | 2001      | 2002      | 2003      | 2004      | 2005      | 2006      | 2007      | 2008      | 2009      | 2010      | 2011      | 2012      | 2013      | 2014      | 2015      |            |
| Canada                    | 1         | 1         | 1         | 1         | 1         | 1         | 1         | 1         | 1         | 1         | 1         | 1         | 1         | 0         | 0         | 13         |
| Chile                     | 1         | 1         | 1         | 1         | 1         | 1         | 1         | 1         | 1         | 1         | 1         | 1         | 1         | 1         | 1         | 15         |
| United States of America  | 1         | 1         | 1         | 1         | 1         | 1         | 1         | 1         | 1         | 1         | 0         | 1         | 0         | 0         | 1         | 12         |
| Israel                    | 1         | 1         | 1         | 1         | 1         | 1         | 1         | 1         | 1         | 1         | 1         | 1         | 1         | 1         | 1         | 15         |
| Japan                     | 1         | 1         | 1         | 1         | 1         | 1         | 1         | 1         | 1         | 1         | 1         | 1         | 1         | 1         | 1         | 15         |
| Republic of Korea         | 1         | 1         | 1         | 1         | 1         | 1         | 1         | 1         | 1         | 1         | 1         | 1         | 1         | 1         | 1         | 15         |
| Austria                   | 1         | 1         | 1         | 1         | 1         | 1         | 1         | 1         | 1         | 1         | 1         | 1         | 1         | 1         | 1         | 15         |
| Belgium                   | 1         | 1         | 1         | 1         | 1         | 1         | 1         | 1         | 1         | 1         | 1         | 1         | 1         | 1         | 1         | 15         |
| Czechia                   | 1         | 1         | 1         | 1         | 1         | 1         | 1         | 1         | 1         | 1         | 1         | 1         | 1         | 1         | 1         | 15         |
| Denmark                   | 1         | 1         | 1         | 1         | 1         | 1         | 1         | 1         | 1         | 1         | 1         | 1         | 1         | 1         | 1         | 15         |
| Estonia                   | 1         | 1         | 1         | 1         | 1         | 1         | 1         | 1         | 1         | 1         | 1         | 1         | 1         | 1         | 1         | 15         |
| Finland                   | 1         | 1         | 1         | 1         | 1         | 1         | 1         | 1         | 1         | 1         | 1         | 1         | 1         | 1         | 1         | 15         |
| France                    | 1         | 1         | 1         | 1         | 1         | 1         | 1         | 1         | 1         | 1         | 1         | 1         | 1         | 1         | 0         | 14         |
| Germany                   | 1         | 1         | 1         | 1         | 1         | 1         | 1         | 1         | 1         | 1         | 1         | 1         | 1         | 1         | 1         | 15         |
| Greece                    | 1         | 1         | 1         | 1         | 1         | 1         | 1         | 1         | 1         | 1         | 1         | 1         | 1         | 1         | 1         | 15         |
| Hungary                   | 1         | 1         | 1         | 1         | 1         | 1         | 1         | 1         | 1         | 1         | 1         | 1         | 1         | 1         | 1         | 15         |
| Iceland                   | 1         | 1         | 1         | 1         | 1         | 1         | 1         | 1         | 1         | 1         | 1         | 1         | 1         | 1         | 1         | 15         |
| Ireland                   | 1         | 1         | 1         | 1         | 1         | 1         | 1         | 1         | 1         | 1         | 1         | 1         | 1         | 1         | 0         | 14         |
| Italy                     | 1         | 1         | 1         | 1         | 1         | 1         | 1         | 1         | 1         | 1         | 1         | 1         | 1         | 1         | 1         | 15         |
| Latvia                    | 1         | 1         | 1         | 1         | 1         | 1         | 1         | 1         | 1         | 1         | 1         | 1         | 1         | 1         | 1         | 15         |
| Lithuania                 | 1         | 1         | 1         | 1         | 1         | 1         | 1         | 1         | 1         | 1         | 1         | 1         | 1         | 1         | 1         | 15         |
| Luxembourg                | 1         | 1         | 1         | 1         | 1         | 1         | 1         | 1         | 1         | 1         | 1         | 1         | 1         | 1         | 1         | 15         |
| Netherlands               | 1         | 1         | 1         | 1         | 1         | 1         | 1         | 1         | 1         | 1         | 1         | 1         | 1         | 1         | 1         | 15         |
| Norway                    | 1         | 1         | 1         | 1         | 1         | 1         | 1         | 1         | 1         | 1         | 1         | 1         | 1         | 1         | 1         | 15         |
| Poland                    | 1         | 1         | 1         | 1         | 1         | 1         | 1         | 1         | 1         | 1         | 1         | 1         | 1         | 1         | 1         | 15         |
| Portugal                  | 1         | 1         | 1         | 0         | 0         | 0         | 1         | 1         | 1         | 1         | 1         | 1         | 1         | 1         | 0         | 11         |
| Slovakia                  | 1         | 1         | 1         | 1         | 1         | 1         | 1         | 1         | 1         | 1         | 0         | 1         | 1         | 1         | 0         | 13         |
| Slovenia                  | 1         | 1         | 1         | 1         | 1         | 1         | 1         | 1         | 1         | 1         | 1         | 1         | 1         | 1         | 1         | 15         |
| Spain                     | 1         | 1         | 1         | 1         | 1         | 1         | 1         | 1         | 1         | 1         | 1         | 1         | 1         | 1         | 1         | 15         |
| Sweden                    | 1         | 1         | 1         | 1         | 1         | 1         | 1         | 1         | 1         | 1         | 1         | 1         | 1         | 1         | 1         | 15         |
| Switzerland               | 1         | 1         | 1         | 1         | 1         | 1         | 1         | 1         | 1         | 1         | 1         | 1         | 1         | 1         | 1         | 15         |
| United Kingdom            | 1         | 1         | 1         | 1         | 1         | 1         | 1         | 1         | 1         | 1         | 1         | 1         | 1         | 1         | 1         | 15         |
| Australia                 | 1         | 1         | 1         | 1         | 0         | 1         | 1         | 1         | 1         | 1         | 1         | 1         | 1         | 1         | 1         | 14         |
| New Zealand               | 1         | 1         | 1         | 1         | 1         | 1         | 1         | 1         | 1         | 1         | 1         | 1         | 1         | 0         | 0         | 13         |
| <i>All OECD countries</i> | <i>34</i> | <i>34</i> | <i>34</i> | <i>33</i> | <i>32</i> | <i>33</i> | <i>34</i> | <i>34</i> | <i>34</i> | <i>34</i> | <i>32</i> | <i>34</i> | <i>33</i> | <i>31</i> | <i>28</i> | <i>494</i> |

Notes: Causes of death are coded according to the ICD-9 (Austria 2001; Greece 2001/2013; Ireland 2001/2006; Italy 2001/2002; Portugal 2001) or ICD-10 (all other country-years). Reference populations for some country-years were retrieved from UNdata if not available in the WHO Mortality Database (Canada 2006/2013; Chile 2001/2015; United States of America 2008/2010, 2012, 2015; Finland 2015; Ireland 2010, 2014; Switzerland 2014/2015).

**Table 1** Nolte and McKee's list of causes of death considered amenable to health care

| Disease category                              | Age  | Diseases                                                   | ICD-9 codes     | ICD-10 codes        |
|-----------------------------------------------|------|------------------------------------------------------------|-----------------|---------------------|
| Infectious diseases                           | 0-74 | Tuberculosis                                               | 010-8, 137      | A15-9, B90          |
|                                               | 0-74 | Septicaemia                                                | 038             | A40-1               |
|                                               | 0-74 | Pneumonia                                                  | 480-6           | J12-8               |
|                                               | 0-74 | Influenza                                                  | 487             | J10-1               |
|                                               | 0-14 | Intestinal infections (other than typhoid, diphtheria)     | 001-9           | A00-9               |
|                                               | 0-74 | Diphtheria, Tetanus, Poliomyelitis                         | 032, 037, 045   | A35-6, A80          |
|                                               | 0-14 | Whooping cough                                             | 033             | A37                 |
|                                               | 1-14 | Measles                                                    | 055             | B05                 |
| Cancers                                       | 0-74 | Colorectal cancer                                          | 153-4           | C18-21              |
|                                               | 0-74 | Malignant neoplasm of skin                                 | 173             | C44                 |
|                                               | 0-74 | Breast cancer                                              | 174             | C50                 |
|                                               | 0-44 | Cervical cancer and uterine cancer                         | 179, 180, 182   | C53-5               |
|                                               | 0-74 | Neoplasm of the testis                                     | 186             | C62                 |
|                                               | 0-74 | Hodgkin's disease                                          | 201             | C81                 |
|                                               | 0-44 | Leukaemia                                                  | 204-8           | C91-5               |
| Endocrine, nutritional and metabolic diseases | 0-74 | Thyroid disorders                                          | 240-6           | E00-7               |
|                                               | 0-49 | Diabetes mellitus                                          | 250             | E10-4               |
| Diseases of the nervous system                | 0-74 | Epilepsy                                                   | 345             | G40-1               |
| Diseases of the circulatory system            | 0-74 | Rheumatic heart diseases                                   | 393-8           | I05-9               |
|                                               | 0-74 | Ischemic heart diseases: 50% of deaths                     | 410-4           | I20-5               |
|                                               | 0-74 | Cerebrovascular diseases                                   | 430-8           | I60-9               |
|                                               | 0-74 | Hypertensive diseases                                      | 401-5           | I10-3, I15          |
| Diseases of the genitourinary system          | 0-74 | Nephritis and nephrosis                                    | 580-9           | N00-7, N17-9, N25-7 |
|                                               | 0-74 | Benign prostatic hyperplasia                               | 600             | N40                 |
| Diseases of the respiratory system            | 1-14 | All respiratory diseases (excl. pneumonia/influenza)       | 460-79, 488-519 | J00-9, J20-99       |
| Diseases of the digestive system              | 0-74 | Peptic ulcer                                               | 531-3           | K25-7               |
|                                               | 0-74 | Appendicitis                                               | 540-3           | K35-8               |
|                                               | 0-74 | Abdominal hernia                                           | 550-3           | K40-6               |
|                                               | 0-74 | Cholelithiasis and cholecystitis                           | 574-5           | K80-1               |
| Perinatal mortality                           | 0-74 | Maternal deaths                                            | 630-76          | O00-99              |
|                                               | 0-74 | Conditions originating in the early neonatal period        | 760-79          | P00-96              |
|                                               | 0-74 | Congenital cardiovascular anomalies                        | 745-7           | Q20-8               |
| External causes                               | 0-74 | Misadventures to patients during surgical and medical care | E870-6, E878-9  | Y60-9, Y83-4        |

Source: Nolte and McKee 2008; Gay et al. 2011.

**Table 1** Yearly Amenable Mortality Rates (Per 100,000) for Ages <1 and 1–4 Years in 34 OECD Countries, 2001/2005, 2006/2010 and 2011/2015 (See Table S1 for Country-Level Data Availability)

| Country | <1 Year                        |         |         |                   |                 | 1–4 Years                      |         |         |                   |                 |
|---------|--------------------------------|---------|---------|-------------------|-----------------|--------------------------------|---------|---------|-------------------|-----------------|
|         | Yearly Amenable Mortality Rate |         |         | % Change (95% CI) |                 | Yearly Amenable Mortality Rate |         |         | % Change (95% CI) |                 |
|         | 2001/05                        | 2006/10 | 2011/15 | 2006/10–2001/05   | 2011/15–2006/10 | 2001/05                        | 2006/10 | 2011/15 | 2006/10–2001/05   | 2011/15–2006/10 |
| CA      | 343.10                         | 343.46  | 332.97  | .1                | -3.1            | 4.34                           | 4.09    | 3.98    | -5.7              | -2.6            |
| US      | 415.80                         | 382.24  | 350.87  | -8.1*             | -8.2*           | 6.00                           | 5.46    | 5.13    | -8.9*             | -6.1            |
| CL      | 478.56                         | 457.40  | 427.15  | -4.4              | -6.6            | 10.11                          | 7.50    | 5.90    | -25.8*            | -21.3           |
| IL      | 291.77                         | 221.77  | 189.73  | -24.0*            | -14.4*          | 6.89                           | 4.62    | 3.86    | -32.9             | -16.5           |
| JP      | 150.76                         | 121.39  | 97.24   | -19.5*            | -19.9*          | 8.78                           | 7.84    | 7.15    | -10.7             | -8.7            |
| KR      | 334.41                         | 235.84  | 198.16  | -29.5*            | -16.0*          | 8.50                           | 6.69    | 4.59    | -21.3*            | -31.5*          |
| DK      | 285.08                         | 191.17  | 220.19  | -32.9*            | 15.2            | 6.16                           | 3.87    | 3.11    | -37.2             | -19.6           |
| IS      | 134.24                         | 127.50  | 85.5    | -5.0              | -32.9           | 4.74                           | 6.78    | 2.14    | 43.2              | -68.4           |
| FI      | 186.77                         | 151.76  | 109.42  | -18.7             | -27.9*          | 4.46                           | 3.25    | 2.80    | -27.2             | -14.0           |
| NO      | 207.32                         | 186.37  | 149.55  | -10.1             | -19.8           | 5.77                           | 4.56    | 3.36    | -21.0             | -26.4           |
| SE      | 178.05                         | 136.44  | 130.95  | -23.4*            | -4.0            | 4.44                           | 4.03    | 2.82    | -9.2              | -30.1           |
| AT      | 297.83                         | 243.56  | 198.02  | -18.2*            | -18.7*          | 4.72                           | 4.54    | 3.62    | -3.7              | -20.4           |
| BE      | 244.36                         | 220.91  | 198.89  | -9.6              | -10.0           | 5.25                           | 3.82    | 4.09    | -27.3             | 7.1             |
| FR      | 237.86                         | 216.89  | 211.19  | -8.8*             | -2.6            | 3.98                           | 3.73    | 2.82    | -6.2              | -24.3*          |
| DE      | 245.69                         | 223.48  | 206.37  | -9.0*             | -7.7*           | 5.31                           | 4.27    | 4.19    | -19.6*            | -1.9            |
| LU      | 218.18                         | 111.42  | 126.65  | -48.9             | 13.7            | 0.88                           | 1.76    | 1.62    | 98.8              | -7.6            |
| NL      | 306.18                         | 257.29  | 234.49  | -16.0*            | -8.9            | 4.66                           | 4.63    | 3.03    | -8                | -34.6           |
| CH      | 274.24                         | 272.00  | 251.67  | -8                | -7.5            | 4.22                           | 2.95    | 2.02    | -30.2             | -31.3           |
| IE      | 247.00                         | 198.95  | 184.09  | -19.5*            | -7.5            | 6.28                           | 2.53    | 3.18    | -59.7*            | 25.6            |
| GB      | 346.07                         | 305.01  | 256.65  | -11.9*            | -15.9*          | 6.33                           | 5.65    | 4.96    | -10.7             | -12.2           |
| GR      | 305.19                         | 218.33  | 222.92  | -28.5*            | 2.1             | 5.54                           | 5.36    | 4.62    | -3.4              | -13.8           |
| IT      | 299.93                         | 256.16  | 224.78  | -14.6*            | -12.2*          | 4.96                           | 4.05    | 4.15    | -18.4             | 2.4             |
| PT      | 300.62                         | 219.72  | 219.56  | -26.9*            | -1              | 8.41                           | 3.92    | 4.19    | -53.4*            | 6.9             |
| ES      | 272.67                         | 231.74  | 204.24  | -15.0*            | -11.9*          | 6.23                           | 5.13    | 3.59    | -17.6             | -30.0*          |
| CZ      | 259.40                         | 209.92  | 166.61  | -19.1*            | -20.6*          | 4.74                           | 4.43    | 3.24    | -6.7              | -26.9           |
| EE      | 394.90                         | 262.22  | 139.38  | -33.6*            | -46.8*          | 6.91                           | 4.89    | 7.25    | -29.3             | 48.4            |
| HU      | 530.50                         | 406.91  | 348.94  | -23.3*            | -14.2*          | 7.03                           | 6.18    | 5.80    | -12.2             | -6.0            |
| LV      | 561.36                         | 440.42  | 324.98  | -21.5*            | -26.2*          | 7.23                           | 6.54    | 3.42    | -9.5              | -47.8           |
| LT      | 412.34                         | 342.21  | 225.15  | -17.0             | -34.2*          | 7.14                           | 5.92    | 5.34    | -17.2             | -9.7            |
| PL      | 488.86                         | 400.92  | 315.70  | -18.0*            | -21.3*          | 7.81                           | 8.35    | 6.69    | 6.9               | -19.9           |
| SK      | 432.24                         | 373.71  | 345.44  | -13.5             | -7.6            | 13.09                          | 11.08   | 9.26    | -15.3             | -16.4           |
| SI      | 270.48                         | 203.78  | 143.64  | -24.7             | -29.5           | 5.01                           | 3.69    | 3.87    | -26.3             | 4.8             |
| AU      | 290.88                         | 261.16  | 212.74  | -10.2*            | -18.5*          | 5.13                           | 4.43    | 3.40    | -13.6             | -23.3           |
| NZ      | 317.89                         | 286.41  | 294.76  | -9.9              | 2.9             | 5.14                           | 4.98    | 6.23    | -3.1              | 24.9            |
| All     | 332.78                         | 295.17  | 240.22  | -11.3*            | -18.6*          | 6.27                           | 5.43    | 4.73    | -13.4             | -13.0           |

\* Percentage decrease is statistically significant ( $P < .05$ ).

Abbreviations: CA, Canada; CL, Chile; US, United State of America; IL, Israel; JP, Japan; KR, Republic of Korea; AT, Austria; BE, Belgium; CZ, Czechia; DK, Denmark; EE, Estonia; FI, Finland; FR, France; DE, Germany; GR, Greece; HU, Hungary; IS, Iceland; IE, Ireland; IT, Italy; LV, Latvia; LT, Lithuania; LU, Luxembourg; NL, Netherlands; NO, Norway; PL, Poland; PT, Portugal; SK, Slovakia; SI, Slovenia; ES, Spain; SE, Sweden; CH, Switzerland; GB, United Kingdom; AU, Australia; NZ, New Zealand.

**Table 2** Yearly Amenable Mortality Rates (Per 100,000) for Ages 5–9 and 10–14 Years in 34 OECD Countries, 2001/2005, 2006/2010 and 2011/2015 (See Table S1 for Country-Level Data Availability)

| Country | 5–9 Years                      |         |         |                   |                 | 10–14 Years                    |         |         |                   |                 |
|---------|--------------------------------|---------|---------|-------------------|-----------------|--------------------------------|---------|---------|-------------------|-----------------|
|         | Yearly Amenable Mortality Rate |         |         | % Change (95% CI) |                 | Yearly Amenable Mortality Rate |         |         | % Change (95% CI) |                 |
|         | 2001/05                        | 2006/10 | 2011/15 | 2006/10–2001/05   | 2011/15–2006/10 | 2001/05                        | 2006/10 | 2011/15 | 2006/10–2001/05   | 2011/15–2006/10 |
| CA      | 1.92                           | 2.11    | 1.38    | 9.7               | -34.6*          | 1.80                           | 1.80    | 1.91    | .3                | 5.7             |
| US      | 2.58                           | 2.38    | 2.23    | -7.6              | -6.4            | 3.06                           | 2.76    | 2.52    | -9.6              | -8.9            |
| CL      | 3.69                           | 3.17    | 2.94    | -14.1             | -7.2            | 3.72                           | 3.16    | 3.11    | -15.0             | -1.4            |
| IL      | 1.73                           | 2.05    | 2.10    | 18.2              | 2.6             | 2.54                           | 2.04    | 1.73    | -19.8             | -14.8           |
| JP      | 2.67                           | 2.50    | 2.40    | -6.2              | -3.9            | 2.55                           | 2.17    | 2.20    | -14.8             | 1.2             |
| KR      | 3.42                           | 2.39    | 1.86    | -30.1*            | -22.0           | 3.58                           | 2.55    | 1.99    | -28.9*            | -21.7           |
| DK      | 1.78                           | 1.32    | 1.21    | -25.8             | -8.4            | 2.10                           | 1.78    | 0.72    | -15.6             | -59.7           |
| IS      | 2.00                           | 2.08    | 0.94    | 4.2               | -54.9           | 1.71                           | 1.98    | 1.23    | 15.9              | -37.8           |
| FI      | 0                              | 0.94    | 1.80    | N/A               | 92.2            | 1.75                           | 4.48    | 2.81    | 156.1             | -37.2           |
| NO      | 2.73                           | 2.20    | 1.62    | -19.4             | -26.3           | 2.14                           | 1.53    | 1.49    | -28.8             | -2.6            |
| SE      | 1.45                           | 1.56    | 1.53    | 8.2               | -2.1            | 2.56                           | 1.80    | 1.83    | -29.7             | 1.6             |
| AT      | 2.35                           | 1.36    | 1.53    | -42.1             | 12.7            | 2.03                           | 2.18    | 1.62    | 7.8               | -25.9           |
| BE      | 2.02                           | 2.13    | 1.52    | 5.5               | -28.7           | 2.41                           | 1.96    | 1.53    | -18.6             | -22.1           |
| FR      | 1.89                           | 1.52    | 1.25    | -19.7             | -17.5           | 1.96                           | 1.59    | 1.41    | -18.8             | -11.5           |
| DE      | 2.33                           | 1.80    | 1.83    | -22.9             | 1.6             | 2.55                           | 2.09    | 1.78    | -18.0             | -15.1           |
| LU      | 1.38                           | 1.69    | 1.98    | 22.6              | 17.4            | 2.88                           | 1.98    | 0.64    | -31.1             | -67.5           |
| NL      | 2.14                           | 1.76    | 1.43    | -17.8             | -18.8           | 2.89                           | 2.12    | 1.85    | -26.6             | -12.7           |
| CH      | 1.52                           | 1.82    | 1.37    | 19.8              | -24.5           | 2.24                           | 1.23    | 1.58    | -45.2             | 27.9            |
| IE      | 3.03                           | 1.86    | 1.29    | -38.7             | -30.4           | 2.98                           | 2.12    | 1.96    | -28.7             | -7.8            |
| GB      | 2.98                           | 2.59    | 2.13    | -13.1             | -17.8           | 3.18                           | 2.76    | 2.35    | -13.0             | -14.8           |
| GR      | 3.13                           | 2.54    | 2.18    | -18.8             | -14.2           | 3.55                           | 2.63    | 2.79    | -25.7             | 6.0             |
| IT      | 2.36                           | 2.08    | 1.86    | -11.8             | -10.6           | 2.84                           | 2.29    | 2.19    | -19.3             | -4.2            |
| PT      | 3.23                           | 1.67    | 1.67    | -48.2*            | .1              | 4.53                           | 2.66    | 1.87    | -41.2*            | -29.7           |
| ES      | 3.04                           | 2.45    | 2.02    | -19.3             | -17.5           | 3.40                           | 2.64    | 2.14    | -22.3             | -18.9           |
| CZ      | 2.15                           | 2.26    | 2.27    | 5.2               | .7              | 2.67                           | 2.25    | 1.87    | -15.7             | -17.0           |
| EE      | 3.32                           | 3.50    | 1.40    | 5.7               | -60.2           | 4.61                           | 1.84    | 1.79    | -60.0             | -3.0            |
| HU      | 3.34                           | 2.36    | 2.44    | -29.4             | 3.3             | 3.58                           | 3.50    | 2.92    | -2.3              | -16.5           |
| LV      | 4.53                           | 4.62    | 3.53    | 1.9               | -23.4           | 3.65                           | 4.06    | 1.32    | 11.0              | -67.4*          |
| LT      | 3.82                           | 3.35    | 2.78    | -12.2             | -16.9           | 3.08                           | 4.14    | 1.21    | 34.2              | -70.7*          |
| PL      | 2.99                           | 3.14    | 2.97    | 4.9               | -5.3            | 3.03                           | 3.52    | 3.30    | 16.1              | -6.1            |
| SK      | 3.27                           | 4.34    | 3.19    | 32.7              | -26.5           | 3.70                           | 4.23    | 3.35    | 14.4              | -20.9           |
| SI      | 1.67                           | 2.20    | 1.64    | 31.6              | -25.6           | 2.61                           | 1.24    | 1.74    | -52.4             | 40.3            |
| AU      | 2.14                           | 1.81    | 1.76    | -15.6             | -2.5            | 2.24                           | 2.13    | 1.80    | -4.8              | -15.6           |
| NZ      | 2.11                           | 2.01    | 1.37    | -5.0              | -32.0           | 3.04                           | 2.71    | 2.96    | -10.6             | 9.1             |
| All     | 2.59                           | 2.28    | 2.02    | -11.9             | -11.3           | 2.87                           | 2.48    | 2.16    | -13.5             | -13.1           |

\* Percentage decrease is statistically significant ( $P < .05$ ).



**Table 1** Yearly Amenable Mortality Rates (Per 100,000) of Conditions Originating in Early Neonatal Period for Age <1 in 34 OECD Countries, 2001/2005, 2006/2010 and 2011/2015

| Country                  | Rate 2001/2005 | Rate 2006/2010 | Rate 2011/2015 | % Change 2006/10 – 2001/05 | % Change 2011/15 – 2006/10 |
|--------------------------|----------------|----------------|----------------|----------------------------|----------------------------|
| Canada                   | 293.1          | 297.1          | 290.8          | 1.3 (-7.4, 10.1)           | -2.1 (-10.3, 6.1)          |
| Chile                    | 329.3          | 341.9          | 324.2          | 3.8 (-6.2, 13.8)           | -5.2 (-14.3, 3.9)          |
| United States of America | 349.6          | 322.1          | 295.6          | -7.9 (-10.0, -5.7) *       | -8.2 (-10.5, -5.9) *       |
| Israel                   | 229.6          | 174.4          | 142.4          | -24 (-36.3, -11.7) *       | -18.3 (-32.5, -4.2) *      |
| Japan                    | 83.6           | 68.1           | 54.2           | -18.5 (-26.4, -10.7) *     | -20.4 (-29.2, -11.6) *     |
| Republic of Korea        | 262.0          | 186.9          | 160.1          | -28.7 (-34.9, -22.4) *     | -14.3 (-22.9, -5.7) *      |
| Austria                  | 250.9          | 203.5          | 162.4          | -18.9 (-36.0, -1.8) *      | -20.2 (-38.8, -1.6) *      |
| Belgium                  | 193.2          | 182.4          | 162.9          | -5.6 (-23.1, 11.9)         | -10.7 (-27.5, 6.1)         |
| Czechia                  | 209.9          | 167.0          | 136.0          | -20.4 (-36.3, -4.6) *      | -18.6 (-36.0, -1.1) *      |
| Denmark                  | 231.3          | 160.1          | 190.5          | -30.8 (-48.1, -13.4) *     | 18.9 (-12.9, 50.8)         |
| Estonia                  | 290.7          | 188.6          | 109.8          | -35.1 (-66.2, -4.0) *      | -41.8 (-77.5, -6.0) *      |
| Finland                  | 142.0          | 117.4          | 84.4           | -17.3 (-43.8, 9.2)         | 28.2 (-54.3, -2.1) *       |
| France                   | 190.6          | 175.2          | 177.1          | -8.1 (-14.9, -1.3) *       | 1.1 (-6.5, 8.7)            |
| Germany                  | 195.0          | 182.5          | 170.3          | -6.4 (-13.5, .8)           | -6.7 (-14.1, .8)           |
| Greece                   | 209.0          | 155.4          | 164.9          | -25.7 (-40.4, -10.9) *     | 6.1 (-16.4, 28.7)          |
| Hungary                  | 432.5          | 334.2          | 278.4          | -22.7 (-34.0, -11.5) *     | -16.7 (-30.5, -2.9) *      |
| Iceland                  | 119.9          | 102.0          | 67.5           | -14.9 (-121.4, 85.1)       | -33.8 (-129.2, 61.6)       |
| Ireland                  | 189.8          | 154.0          | 145.1          | -18.9 (-40.4, 2.7)         | -5.8 (-31.2, 19.6)         |
| Italy                    | 232.6          | 203.1          | 177.9          | -12.7 (-19.7, -5.7) *      | -12.4 (-20.0, -4.8) *      |
| Latvia                   | 408.7          | 348.6          | 270.5          | -14.7 (-41.0, 11.6)        | -22.4 (-49.2, 4.4)         |
| Lithuania                | 261.4          | 235.8          | 162.6          | -9.8 (-38.6, 19.1)         | -31.1 (-56.0, -6.1) *      |
| Luxembourg               | 203.1          | 104.2          | 113.3          | -48.7 (-100.4, 3.0)        | 8.7 (-111.7, 108.7)        |
| Netherlands              | 249.5          | 211.4          | 199.9          | -15.3 (-26.5, -4.1) *      | -5.4 (-19.1, 8.2)          |
| Norway                   | 166.1          | 158.6          | 123.9          | -4.5 (-31.7, 22.7)         | -21.9 (-45.6, 1.8)         |
| Poland                   | 360.4          | 306.1          | 232.3          | -15.1 (-21.7, -8.4) *      | -24.1 (-30.7, -17.5) *     |
| Portugal                 | 233.6          | 179.5          | 181.2          | -23.2 (-37.6, -8.7) *      | .9 (-20.4, 22.3)           |
| Slovakia                 | 301.7          | 256.6          | 240.2          | -15.0 (-34.1, 4.2)         | -6.4 (-28.3, 15.5)         |
| Slovenia                 | 203.7          | 168.8          | 122.3          | -17.1 (-55.7, 21.5)        | -27.6 (-64.2, 9.1)         |
| Spain                    | 209.6          | 181.7          | 166.7          | -13.3 (-21.4, -5.3) *      | -8.2 (-17.2, .7)           |
| Sweden                   | 142.5          | 103.8          | 109.4          | -27.2 (-45.3, -9.1) *      | 5.4 (-21.4, 32.2)          |
| Switzerland              | 217.4          | 233.3          | 207.7          | 7.3 (-15.7, 30.4)          | -11.0 (-29.8, 7.8)         |
| United Kingdom           | 289.4          | 256.5          | 214.1          | -11.4 (-16.9, -5.9) *      | -16.6 (-22.0, -11.2) *     |
| Australia                | 244.0          | 218.0          | 180.6          | -10.7 (-20.6, -.7) *       | -17.2 (-26.7, -7.6) *      |
| New Zealand              | 255.5          | 225.8          | 242.9          | -11.6 (-32.2, 8.9)         | 7.6 (-17.2, 32.4)          |
| All OECD countries       | 266.3          | 239.8          | 193.8          | -9.9 (-18.4, -1.5) *       | -19.2 (-27.9, -10.4) *     |

\* Percentage decrease is statistically significant ( $P < .05$ ).

**Table 2** Yearly Amenable Mortality Rates (Per 100,000) of Congenital Cardiovascular Anomalies for Age <1 in 34 OECD Countries, 2001/2005, 2006/2010 and 2011/2015

| Country                  | Rate 2001/2005 | Rate 2006/2010 | Rate 2011/2015 | % Change 2006/10 – 2001/05 | % Change 2011/15 – 2006/10 |
|--------------------------|----------------|----------------|----------------|----------------------------|----------------------------|
| Canada                   | 36.7           | 34.6           | 33.0           | -5.6 (-29.1, 17.9)         | -4.8 (-28.5, 18.9)         |
| Chile                    | 91.6           | 79.8           | 80.9           | -12.9 (-29.6, 3.7)         | 1.3 (-18.5, 21.2)          |
| United States of America | 41.6           | 35.8           | 33.5           | -13.9 (-19.9, -7.9) *      | -6.5 (-13.4, .4)           |
| Israel                   | 45.3           | 38.8           | 37.2           | -14.4 (-44.6, 15.9)        | -4.0 (-37.9, 29.9)         |
| Japan                    | 51.5           | 39.7           | 32.0           | -22.9 (-32.6, -13.3) *     | -19.3 (-30.9, -7.7) *      |
| Republic of Korea        | 59.3           | 38.3           | 32.1           | -35.4 (-47.7, -23.1) *     | -16.2 (-35.0, 2.5)         |
| Austria                  | 43.1           | 35.9           | 31.6           | -16.6 (-58.7, 25.5)        | -12.1 (-59.6, 35.5)        |
| Belgium                  | 40.8           | 29.1           | 28.2           | -28.6 (-59.7, 2.4)         | -2.9 (-47.8, 42)           |
| Czechia                  | 34.4           | 29.5           | 21.1           | -14.2 (-55.6, 27.2)        | -28.5 (-66.3, 9.3)         |
| Denmark                  | 48.9           | 25.4           | 26.1           | -47.9 (-79.0, -16.8) *     | 2.7 (-69.0, 74.3)          |
| Estonia                  | 68.9           | 59.4           | 26.8           | -13.8 (-92.5, 64.9)        | -55.0 (-108.8, -1.2) *     |
| Finland                  | 37.9           | 26.6           | 20.3           | -29.8 (-75.4, 15.8)        | -23.5 (-80.9, 33.8)        |
| France                   | 37.3           | 34.4           | 29.0           | -7.6 (-23.0, 7.9)          | -15.8 (-30.8, -.8) *       |
| Germany                  | 44.2           | 33.6           | 30.6           | -24.0 (-36.9, -11.1) *     | -8.9 (-26.0, 8.2)          |
| Greece                   | 71.7           | 43.5           | 40.9           | -39.3 (-61.1, -17.5) *     | -6.0 (-45.1, 33.0)         |
| Hungary                  | 75.6           | 69.0           | 62.6           | -8.7 (-39.2, 21.8)         | -9.3 (-41.5, 22.9)         |
| Iceland                  | 4.8            | 21.2           | 13.5           | 343.2 (-1784.6, 443.2)     | -36.5 (-239.8, 63.5)       |
| Ireland                  | 46.8           | 38.9           | 36.2           | -16.9 (-61.1, 27.3)        | -6.9 (-57.0, 43.2)         |
| Italy                    | 57.1           | 41.8           | 36.0           | -26.8 (-39.2, -14.4) *     | -13.9 (-30.5, 2.6)         |
| Latvia                   | 119.2          | 77.6           | 42.6           | -34.9 (-75.0, 5.2)         | -45.1 (-89.9, -.2) *       |
| Lithuania                | 99.8           | 79.3           | 45.4           | -20.5 (-63.2, 22.1)        | -42.7 (-80.6, -4.8) *      |
| Luxembourg               | 15.0           | 0              | 13.3           | -100 (., 0)                | N/A                        |
| Netherlands              | 47.6           | 38.4           | 28.7           | -19.4 (-44.2, 5.5)         | -25.3 (-52.3, 1.8)         |
| Norway                   | 38.4           | 23.0           | 22.0           | -39.9 (-80.4, .6)          | -4.6 (-76.6, 67.4)         |
| Poland                   | 91.5           | 69.2           | 67.0           | -24.4 (-36.5, -12.2) *     | -3.2 (-19.8, 13.4)         |
| Portugal                 | 47.7           | 33.9           | 32.0           | -29.0 (-59.3, 1.3)         | -5.5 (-52.3, 41.2)         |
| Slovakia                 | 70.2           | 64.2           | 67.4           | -8.6 (-50.5, 33.4)         | 5.0 (-42.7, 52.7)          |
| Slovenia                 | 55.5           | 29.1           | 17.6           | -47.5 (-100.8, 5.8)        | -39.5 (-117.2, 38.2)       |
| Spain                    | 54.1           | 41.7           | 31.2           | -23.1 (-37.5, -8.6) *      | -25.2 (-41.4, -9.1) *      |
| Sweden                   | 29.3           | 20.2           | 13.0           | -31.1 (-69.5, 7.2)         | -35.8 (-78.1, 6.5)         |
| Switzerland              | 46.4           | 34.2           | 39.2           | -26.4 (-64.1, 11.3)        | 14.8 (-44.9, 74.5)         |
| United Kingdom           | 42.1           | 36.2           | 33.3           | -13.8 (-28.0, .4)          | -8.1 (-23.6, 7.3)          |
| Australia                | 33.7           | 32.5           | 24.7           | -3.7 (-32.2, 24.8)         | -24.0 (-47.2, -.7) *       |
| New Zealand              | 40.6           | 37.2           | 30.6           | -8.4 (-61.3, 44.5)         | -17.8 (-67.9, 32.2)        |
| All OECD countries       | 38.8           | 47.9           | 35.0           | -18.9 (-37.3, -.5) *       | -9.9 (-33.4, 13.5)         |

\* Percentage decrease is statistically significant ( $P < .05$ ).

**Table 3** Yearly Amenable Mortality Rates (Per 100,000) of Pneumonia for Age <1 in 34 OECD Countries, 2001/2005, 2006/2010 and 2011/2015

| Country                  | Rate 2001/2005 | Rate 2006/2010 | Rate 2011/2015 | % Change 2006/10 – 2001/05 | % Change 2011/15 – 2006/10 |
|--------------------------|----------------|----------------|----------------|----------------------------|----------------------------|
| Canada                   | 3.3            | 2.6            | 1.8            | -19.9 (-89.2, 49.5)        | -32.5 (-99.2, 34.2)        |
| Chile                    | 41.0           | 24.1           | 11.7           | -41.2 (-60.0, -22.4) *     | -51.2 (-72.7, -29.7) *     |
| United States of America | 6.6            | 5.0            | 3.8            | -23.9 (-37.6, -10.1) *     | -23.8 (-39.7, -7.9) *      |
| Israel                   | 2.8            | 2.2            | 1.8            | -22.3 (-134.6, 77.7)       | -20.6 (-143.8, 79.4)       |
| Japan                    | 4.7            | 4.4            | 3.5            | -6.0 (-43.0, 31.1)         | -20.9 (-55.5, 13.7)        |
| Republic of Korea        | 2.7            | 2.1            | 1.5            | -22.7 (-87.8, 42.4)        | -30.4 (-100.6, 39.8)       |
| Austria                  | 1.3            | .5             | 1.3            | -59.9 (-207.0, 40.1)       | 142.7 (-747.1, 242.7)      |
| Belgium                  | 2.1            | 2.1            | 1.4            | -.3 (-175.2, 99.7)         | -32.4 (-160.8, 67.6)       |
| Czechia                  | 10.2           | 8.3            | 4.6            | -19.0 (-91.8, 53.9)        | -44.9 (-104.7, 14.9)       |
| Denmark                  | 2.2            | 1.2            | 1.7            | -42.6 (-200.2, 57.4)       | 38.5 (-368.6, 138.5)       |
| Estonia                  | 16.5           | 3.9            | 2.8            | -76.5 (-143.6, -9.4) *     | -27.3 (-318, 72.7)         |
| Finland                  | 1.8            | 1.7            | 1.0            | -5.0 (-268.4, 95)          | -39.6 (-232.9, 60.4)       |
| France                   | .8             | .6             | .2             | -22.5 (-113.2, 68.1)       | -69.6 (-125, -14.3) *      |
| Germany                  | 1.8            | 1.5            | 1.0            | -18.1 (-85, 48.8)          | -34.5 (-98.1, 29.1)        |
| Greece                   | 15.0           | 14.6           | 8.9            | -3.1 (-70.1, 63.8)         | -38.8 (-88.8, 11.1)        |
| Hungary                  | 16.3           | 2.1            | 3.6            | -87.2 (-106.1, -68.3) *    | 70.9 (-231, 170.9)         |
| Iceland                  | 4.8            | 0              | 0              | -100 (., 0)                | N/A                        |
| Ireland                  | 5.1            | 2.0            | 0              | -60.6 (-139.6, 18.3)       | -100 (., 0)                |
| Italy                    | 2.3            | .9             | 1.2            | -59.5 (-101, -18) *        | 29.5 (-121.4, 129.5)       |
| Latvia                   | 21.7           | 11.6           | 5.0            | -46.5 (-128.5, 35.5)       | -57.3 (-155.8, 41.3)       |
| Lithuania                | 37.2           | 19.8           | 8.6            | -46.8 (-99.5, 6)           | -56.8 (-119.7, 6)          |
| Luxembourg               | 0              | 3.6            | 0              | N/A                        | -100 (., 0)                |
| Netherlands              | 1.4            | 1.7            | .6             | 24 (-174.9, 124)           | -67.3 (-140.7, 6.2)        |
| Norway                   | 1.1            | 2.3            | 1.3            | 121.4 (-548.2, 221.4)      | -43 (-199.5, 57)           |
| Poland                   | 14.8           | 11.8           | 11.6           | -19.9 (-51.4, 11.6)        | -1.9 (-42.5, 38.7)         |
| Portugal                 | 7.4            | 1.2            | 1.4            | -83.3 (-114.7, -52) *      | 13.4 (-267.7, 113.4)       |
| Slovakia                 | 47.2           | 41.3           | 30.8           | -12.6 (-62, 36.9)          | -25.5 (-71.8, 20.8)        |
| Slovenia                 | 3.4            | 4.9            | 3.7            | 42.9 (-414.5, 142.9)       | -23.6 (-248.2, 76.4)       |
| Spain                    | 1.5            | 1.3            | .7             | -14.8 (-107.4, 77.9)       | -45 (-118.8, 28.8)         |
| Sweden                   | 1.4            | 2.8            | 3.2            | 90.5 (-291.7, 190.5)       | 14.6 (-161, 114.6)         |
| Switzerland              | 1.6            | 1.1            | 1.7            | -35.7 (-217.5, 64.3)       | 64 (-386.5, 164)           |
| United Kingdom           | 5.0            | 3.6            | 2.5            | -29.2 (-64.8, 6.3)         | -28.5 (-69.6, 12.6)        |
| Australia                | 5.3            | 3.5            | 2.0            | -34 (-88.5, 20.6)          | -41.2 (-100.3, 17.9)       |
| New Zealand              | 11.0           | 11.5           | 10.9           | 4.5 (-107.7, 104.5)        | -5.4 (-105, 94.1)          |
| All OECD countries       | 6.1            | 4.5            | 3.1            | -25.7 (-74.3, 22.9)        | -30.7 (-88.1, 26.7)        |

\* Percentage decrease is statistically significant ( $P < .05$ ).

**Table 4** Yearly Amenable Mortality Rates (Per 100,000) of Septicaemia for Age <1 in 34 OECD Countries, 2001/2005, 2006/2010 and 2011/2015

| Country                  | Rate 2001/2005 | Rate 2006/2010 | Rate 2011/2015 | % Change 2006/10 – 2001/05 | % Change 2011/15 – 2006/10 |
|--------------------------|----------------|----------------|----------------|----------------------------|----------------------------|
| Canada                   | 3.2            | 3.3            | 2.0            | 2.0 (-81.8, 85.9)          | -40.6 (-95.2, 14)          |
| Chile                    | 2.6            | 2.1            | 1.6            | -20.6 (-112.5, 71.4)       | -23.4 (-123.2, 76.4)       |
| United States of America | 7.2            | 6.1            | 4.5            | -15.5 (-29.7, -1.2) *      | -25.6 (-39.8, -11.4) *     |
| Israel                   | 4.7            | 2.5            | 2.6            | -47.4 (-113.8, 19)         | 4.1 (-138.8, 104.1)        |
| Japan                    | 6.2            | 5.0            | 4.2            | -19.9 (-48.5, 8.7)         | -15.4 (-49.4, 18.7)        |
| Republic of Korea        | 1.8            | 1.8            | .8             | 3.2 (-96.2, 102.5)         | -55 (-111, 1)              |
| Austria                  | .5             | .5             | .3             | .3 (-439.3, 100.3)         | -51.5 (-312, 48.5)         |
| Belgium                  | 2.3            | 1.6            | 1.6            | -29.2 (-159.7, 70.8)       | -2.4 (-193.7, 97.6)        |
| Czechia                  | 1.1            | 1.9            | 1.8            | 82.1 (-348.3, 182.1)       | -5.8 (-186.1, 94.2)        |
| Denmark                  | .9             | .9             | 0              | .4 (-358.8, 100.4)         | -100 (., 0)                |
| Estonia                  | 7.5            | 3.9            | 0              | -48.3 (-213.8, 51.7)       | -100 (., 0)                |
| Finland                  | 1.4            | 2.4            | 1.0            | 66.3 (-390.5, 166.3)       | -56.9 (-187.3, 43.1)       |
| France                   | 1.7            | 1.2            | 1.1            | -25.6 (-87.9, 36.6)        | -7.8 (-92.3, 76.7)         |
| Germany                  | .9             | 1.4            | 1.3            | 60.7 (-102.3, 160.7)       | -8 (-92.6, 76.6)           |
| Greece                   | 7.1            | 3.7            | 4.9            | -48.3 (-110.2, 13.5)       | 31.8 (-140.8, 131.8)       |
| Hungary                  | 1.7            | 0              | .2             | -100 (., 0)                | N/A                        |
| Iceland                  | 0              | 0              | 4.5            | N/A                        | N/A                        |
| Ireland                  | .7             | .3             | 1.4            | -57.8 (-284.2, 42.2)       | 383.5 (-1937.6, 483.5)     |
| Italy                    | 2.5            | 4.6            | 3.7            | 84.5 (-37.4, 184.5)        | -19.4 (-67.2, 28.5)        |
| Latvia                   | 4.9            | 0              | 1.0            | -100 (., 0)                | N/A                        |
| Lithuania                | 6.0            | 2.6            | 4.0            | -55.9 (-172.1, 44.1)       | 49.5 (-373.4, 149.5)       |
| Luxembourg               | 0              | 0              | 0              | N/A                        | N/A                        |
| Netherlands              | 2.9            | 1.8            | 1.3            | -36.4 (-121.5, 48.8)       | -32.3 (-147.1, 67.7)       |
| Norway                   | .7             | .7             | .7             | -5.1 (-421, 94.9)          | -.3 (-437.3, 99.7)         |
| Poland                   | 18.2           | 8.8            | 2.6            | -51.6 (-71.5, -31.7) *     | -69.9 (-91.2, -48.6) *     |
| Portugal                 | 3.5            | 2.9            | 1.9            | -16.7 (-141.4, 83.3)       | -33.9 (-157.1, 66.1)       |
| Slovakia                 | 3.5            | 3.9            | 1.8            | 12.4 (-209, 112.4)         | -54.3 (-162.3, 45.7)       |
| Slovenia                 | 2.3            | 0              | 0              | -100 (., 0)                | N/A                        |
| Spain                    | 2.1            | 2.0            | 1.3            | -6.4 (-90.6, 77.9)         | -37.1 (-102.4, 28.1)       |
| Sweden                   | 1.2            | 5.5            | 2.8            | 344.5 (-526.7, 444.5)      | -49.1 (-118.2, 20)         |
| Switzerland              | 3.6            | 1.1            | 0              | -70.3 (-144.7, 4)          | -100 (., 0)                |
| United Kingdom           | 4.4            | 3.2            | 1.6            | -28.1 (-66.3, 10.1)        | -50.3 (-84.1, -16.6) *     |
| Australia                | 2.9            | 1.8            | 1.4            | -38.4 (-108.6, 31.8)       | -21.9 (-123.2, 78.1)       |
| New Zealand              | 3.2            | 4.2            | 2.7            | 30 (-217, 130)             | -34.5 (-161.8, 65.5)       |
| All OECD countries       | 5.0            | 4.1            | 2.5            | -18 (-75.5, 39.5)          | -39.1 (-94.3, 16.1)        |

\* Percentage decrease is statistically significant ( $P < .05$ ).

**Table 5** Yearly Amenable Mortality Rates (Per 100,000) of Nephritis and Nephrosis for Age <1 in 34 OECD Countries, 2001/2005, 2006/2010 and 2011/2015

| Country                  | Rate 2001/2005 | Rate 2006/2010 | Rate 2011/2015 | % Change 2006/10 – 2001/05 | % Change 2011/15 – 2006/10 |
|--------------------------|----------------|----------------|----------------|----------------------------|----------------------------|
| Canada                   | 1.4            | .8             | .3             | -40.1 (-127.2, 47)         | -67.6 (-140.9, 5.7)        |
| Chile                    | 1.3            | .6             | .4             | -57.2 (-142.2, 27.7)       | -28.9 (-211.4, 71.1)       |
| United States of America | 4.0            | 3.2            | 2.1            | -19.7 (-38.2, -1.3) *      | -33.6 (-51.8, -15.4) *     |
| Israel                   | 4.0            | .5             | .4             | -86.9 (-117.5, -56.4) *    | -32.5 (-258.3, 67.5)       |
| Japan                    | .8             | .7             | .3             | -11.1 (-94.9, 72.6)        | -60.4 (-112.9, -7.8) *     |
| Republic of Korea        | .5             | .6             | .3             | 29.4 (-193.7, 129.4)       | -50 (-151.5, 50)           |
| Austria                  | .0             | 0              | 0              | N/A                        | N/A                        |
| Belgium                  | .2             | .5             | 0              | 176 (-1220.6, 276)         | -100 (., 0)                |
| Czechia                  | .4             | .5             | .2             | 24.1 (-472.5, 124.1)       | -65.5 (-240.2, 34.5)       |
| Denmark                  | 0              | 0              | 0              | N/A                        | N/A                        |
| Estonia                  | 0              | 0              | 0              | N/A                        | N/A                        |
| Finland                  | .4             | 0              | 1              | -100 (., 0)                | N/A                        |
| France                   | .5             | .1             | .1             | -79.1 (-129.5, -28.8) *    | -5.1 (-304, 94.9)          |
| Germany                  | .2             | .3             | .1             | 94.3 (-337.9, 194.3)       | -64.3 (-155.7, 27.2)       |
| Greece                   | 0              | .2             | 0              | N/A                        | -100 (., 0)                |
| Hungary                  | .4             | 0              | .9             | -100 (., 0)                | N/A                        |
| Iceland                  | 0              | 0              | 0              | N/A                        | N/A                        |
| Ireland                  | .3             | .6             | .3             | 68.7 (-836.7, 168.7)       | -39.6 (-341.5, 60.4)       |
| Italy                    | .9             | 1.2            | 1              | 38.5 (-126.4, 138.5)       | -14.4 (-112.8, 84)         |
| Latvia                   | 0              | 0              | 0              | N/A                        | N/A                        |
| Lithuania                | 0              | 0              | 0              | N/A                        | N/A                        |
| Luxembourg               | 0              | 0              | 0              | N/A                        | N/A                        |
| Netherlands              | .3             | .1             | .2             | -63.8 (-246.9, 36.2)       | 109.4 (-1014.6, 209.4)     |
| Norway                   | 0              | .3             | .3             | N/A                        | -.3 (-618.4, 99.7)         |
| Poland                   | .2             | .5             | .1             | 126.8 (-461.3, 226.8)      | -78.7 (-151.1, -6.2) *     |
| Portugal                 | 1.5            | .5             | 0              | -66.7 (-172.0, 33.3)       | -100 (., 0)                |
| Slovakia                 | .4             | .4             | 0              | -8.1 (-577.8, 91.9)        | -100 (., 0)                |
| Slovenia                 | 0              | 0              | 0              | N/A                        | N/A                        |
| Spain                    | .5             | .4             | .1             | -12.1 (-184.4, 87.9)       | -78 (-152.7, -3.3) *       |
| Sweden                   | 0              | .2             | 0              | N/A                        | -100 (., 0)                |
| Switzerland              | .3             | .3             | .5             | -3.6 (-601.0, 96.4)        | 87.4 (-918.6, 187.4)       |
| United Kingdom           | .6             | .5             | .2             | -20.1 (-133.9, 79.9)       | -51.5 (-138.3, 35.2)       |
| Australia                | .2             | .5             | .3             | 150.0 (-657.3, 250.0)      | -46.9 (-192.8, 53.1)       |
| New Zealand              | .4             | .3             | 0              | -10.0 (-567.8, 90.0)       | -100 (., 0)                |
| All OECD countries       | 1.8            | 1.4            | .6             | -19.9 (-114.1, 74.3)       | -58.2 (-131.3, 14.9)       |

\* Percentage decrease is statistically significant ( $P < .05$ ).

**STROBE 2007 (v4) checklist of items to be included in reports of observational studies in epidemiology\***  
**Checklist for cohort, case-control, and cross-sectional studies (combined)**

| Section/Topic             | Item # | Recommendation                                                                                                                                                                                                                                                                                                                                                                                                                                                         | Reported on page # |
|---------------------------|--------|------------------------------------------------------------------------------------------------------------------------------------------------------------------------------------------------------------------------------------------------------------------------------------------------------------------------------------------------------------------------------------------------------------------------------------------------------------------------|--------------------|
| Title and abstract        | 1      | (a) Indicate the study's design with a commonly used term in the title or the abstract                                                                                                                                                                                                                                                                                                                                                                                 | 1                  |
|                           |        | (b) Provide in the abstract an informative and balanced summary of what was done and what was found                                                                                                                                                                                                                                                                                                                                                                    | 4                  |
| <b>Introduction</b>       |        |                                                                                                                                                                                                                                                                                                                                                                                                                                                                        |                    |
| Background/rationale      | 2      | Explain the scientific background and rationale for the investigation being reported                                                                                                                                                                                                                                                                                                                                                                                   | 6                  |
| Objectives                | 3      | State specific objectives, including any pre-specified hypotheses                                                                                                                                                                                                                                                                                                                                                                                                      | 7                  |
| <b>Methods</b>            |        |                                                                                                                                                                                                                                                                                                                                                                                                                                                                        |                    |
| Study design              | 4      | Present key elements of study design early in the paper                                                                                                                                                                                                                                                                                                                                                                                                                | 7                  |
| Setting                   | 5      | Describe the setting, locations, and relevant dates, including periods of recruitment, exposure, follow-up, and data collection                                                                                                                                                                                                                                                                                                                                        | 8                  |
| Participants              | 6      | (a) <i>Cohort study</i> —Give the eligibility criteria, and the sources and methods of selection of participants. Describe methods of follow-up<br><i>Case-control study</i> —Give the eligibility criteria, and the sources and methods of case ascertainment and control selection. Give the rationale for the choice of cases and controls<br><i>Cross-sectional study</i> —Give the eligibility criteria, and the sources and methods of selection of participants | 8                  |
|                           |        | (b) <i>Cohort study</i> —For matched studies, give matching criteria and number of exposed and unexposed<br><i>Case-control study</i> —For matched studies, give matching criteria and the number of controls per case                                                                                                                                                                                                                                                 |                    |
| Variables                 | 7      | Clearly define all outcomes, exposures, predictors, potential confounders, and effect modifiers. Give diagnostic criteria, if applicable                                                                                                                                                                                                                                                                                                                               | 8                  |
| Data sources/ measurement | 8*     | For each variable of interest, give sources of data and details of methods of assessment (measurement). Describe comparability of assessment methods if there is more than one group                                                                                                                                                                                                                                                                                   | 8                  |
| Bias                      | 9      | Describe any efforts to address potential sources of bias                                                                                                                                                                                                                                                                                                                                                                                                              | 8                  |
| Study size                | 10     | Explain how the study size was arrived at                                                                                                                                                                                                                                                                                                                                                                                                                              | 8                  |
| Quantitative variables    | 11     | Explain how quantitative variables were handled in the analyses. If applicable, describe which groupings were chosen and why                                                                                                                                                                                                                                                                                                                                           | 8                  |
| Statistical methods       | 12     | (a) Describe all statistical methods, including those used to control for confounding                                                                                                                                                                                                                                                                                                                                                                                  | 8-9                |
|                           |        | (b) Describe any methods used to examine subgroups and interactions                                                                                                                                                                                                                                                                                                                                                                                                    | 8-9                |
|                           |        | (c) Explain how missing data were addressed                                                                                                                                                                                                                                                                                                                                                                                                                            | 8-9                |
|                           |        | (d) <i>Cohort study</i> —If applicable, explain how loss to follow-up was addressed<br><i>Case-control study</i> —If applicable, explain how matching of cases and controls was addressed                                                                                                                                                                                                                                                                              |                    |

|                          |     |                                                                                                                                                                                                                                                                                                                                                                                                               |              |
|--------------------------|-----|---------------------------------------------------------------------------------------------------------------------------------------------------------------------------------------------------------------------------------------------------------------------------------------------------------------------------------------------------------------------------------------------------------------|--------------|
|                          |     | <i>Cross-sectional study</i> —If applicable, describe analytical methods taking account of sampling strategy                                                                                                                                                                                                                                                                                                  |              |
|                          |     | (e) Describe any sensitivity analyses                                                                                                                                                                                                                                                                                                                                                                         |              |
| <b>Results</b>           |     |                                                                                                                                                                                                                                                                                                                                                                                                               |              |
| Participants             | 13* | (a) Report numbers of individuals at each stage of study—eg numbers potentially eligible, examined for eligibility, confirmed eligible, included in the study, completing follow-up, and analysed<br>(b) Give reasons for non-participation at each stage<br>(c) Consider use of a flow diagram                                                                                                               | 9            |
| Descriptive data         | 14* | (a) Give characteristics of study participants (eg demographic, clinical, social) and information on exposures and potential confounders<br>(b) Indicate number of participants with missing data for each variable of interest<br>(c) <i>Cohort study</i> —Summarise follow-up time (eg, average and total amount)                                                                                           | 9-10<br>9-10 |
| Outcome data             | 15* | <i>Cohort study</i> —Report numbers of outcome events or summary measures over time<br><i>Case-control study</i> —Report numbers in each exposure category, or summary measures of exposure<br><i>Cross-sectional study</i> —Report numbers of outcome events or summary measures                                                                                                                             | 9-10-11      |
| Main results             | 16  | (a) Give unadjusted estimates and, if applicable, confounder-adjusted estimates and their precision (eg, 95% confidence interval). Make clear which confounders were adjusted for and why they were included<br>(b) Report category boundaries when continuous variables were categorized<br>(c) If relevant, consider translating estimates of relative risk into absolute risk for a meaningful time period | 9-10-11      |
| Other analyses           | 17  | Report other analyses done—eg analyses of subgroups and interactions, and sensitivity analyses                                                                                                                                                                                                                                                                                                                |              |
| <b>Discussion</b>        |     |                                                                                                                                                                                                                                                                                                                                                                                                               |              |
| Key results              | 18  | Summarise key results with reference to study objectives                                                                                                                                                                                                                                                                                                                                                      | 12           |
| Limitations              | 19  | Discuss limitations of the study, taking into account sources of potential bias or imprecision. Discuss both direction and magnitude of any potential bias                                                                                                                                                                                                                                                    | 15           |
| Interpretation           | 20  | Give a cautious overall interpretation of results considering objectives, limitations, multiplicity of analyses, results from similar studies, and other relevant evidence                                                                                                                                                                                                                                    | 13-14        |
| Generalisability         | 21  | Discuss the generalisability (external validity) of the study results                                                                                                                                                                                                                                                                                                                                         | 13-14-15     |
| <b>Other information</b> |     |                                                                                                                                                                                                                                                                                                                                                                                                               |              |
| Funding                  | 22  | Give the source of funding and the role of the funders for the present study and, if applicable, for the original study on which the present article is based                                                                                                                                                                                                                                                 | 17           |

\*Give information separately for cases and controls in case-control studies and, if applicable, for exposed and unexposed groups in cohort and cross-sectional studies.

**Note:** An Explanation and Elaboration article discusses each checklist item and gives methodological background and published examples of transparent reporting. The STROBE checklist is best used in conjunction with this article (freely available on the Web sites of PLoS Medicine at <http://www.plosmedicine.org/>, Annals of Internal Medicine at <http://www.annals.org/>, and Epidemiology at <http://www.epidem.com/>). Information on the STROBE Initiative is available at [www.strobe-statement.org](http://www.strobe-statement.org).

# BMJ Open

## Patterns of amenable child mortality over time in 34 member countries of the Organisation for Economic Co-operation and Development (OECD): evidence from a 15-year time trend analysis (2001-2015)

|                                 |                                                                                                                                                                                                                                                                                                                                                                                                                                                                                                                                                                                                                                                                                                                                                                                                                                                |
|---------------------------------|------------------------------------------------------------------------------------------------------------------------------------------------------------------------------------------------------------------------------------------------------------------------------------------------------------------------------------------------------------------------------------------------------------------------------------------------------------------------------------------------------------------------------------------------------------------------------------------------------------------------------------------------------------------------------------------------------------------------------------------------------------------------------------------------------------------------------------------------|
| Journal:                        | <i>BMJ Open</i>                                                                                                                                                                                                                                                                                                                                                                                                                                                                                                                                                                                                                                                                                                                                                                                                                                |
| Manuscript ID                   | bmjopen-2018-027909.R2                                                                                                                                                                                                                                                                                                                                                                                                                                                                                                                                                                                                                                                                                                                                                                                                                         |
| Article Type:                   | Research                                                                                                                                                                                                                                                                                                                                                                                                                                                                                                                                                                                                                                                                                                                                                                                                                                       |
| Date Submitted by the Author:   | 18-Apr-2019                                                                                                                                                                                                                                                                                                                                                                                                                                                                                                                                                                                                                                                                                                                                                                                                                                    |
| Complete List of Authors:       | Gianino, Maria Michela; University of Torino, Dept. Public Health and Pediatrics<br>Lenzi, Jacopo; Alma Mater Studiorum - University of Bologna, Department of Biomedical and Neuromotor Sciences<br>Bonaudo, Marco; Università degli Studi di Torino, Department of Public Health Sciences and Pediatrics<br>Fantini, Maria Pia; University of Bologna, Department of Biomedical and Neuromotor Sciences<br>Siliquini, Roberta; University of Turin, Department of Public Health Sciences and Pediatrics<br>Ricciardi, W; Università Cattolica del Sacro Cuore Sede di Roma, Istituto di Sanità Pubblica; Fondazione Policlinico Universitario 'Agostino Gemelli' IRCCS<br>Damiani, Gianfranco; Università Cattolica del Sacro Cuore Sede di Roma, Istituto di Sanità Pubblica; Fondazione Policlinico Universitario 'Agostino Gemelli' IRCCS |
| <b>Primary Subject Heading</b>: | Public health                                                                                                                                                                                                                                                                                                                                                                                                                                                                                                                                                                                                                                                                                                                                                                                                                                  |
| Secondary Subject Heading:      | Health services research, Paediatrics                                                                                                                                                                                                                                                                                                                                                                                                                                                                                                                                                                                                                                                                                                                                                                                                          |
| Keywords:                       | International health services < HEALTH SERVICES ADMINISTRATION & MANAGEMENT, amenable mortality, child, childhood, healthcare, OECD countries                                                                                                                                                                                                                                                                                                                                                                                                                                                                                                                                                                                                                                                                                                  |
|                                 |                                                                                                                                                                                                                                                                                                                                                                                                                                                                                                                                                                                                                                                                                                                                                                                                                                                |

SCHOLARONE™  
Manuscripts



1  
2  
3 1 **Patterns of amenable child mortality over time in 34 member countries of the Organisation for**  
4  
5 2 **Economic Co-operation and Development (OECD): evidence from a 15-year time trend analysis (2001-**  
6  
7 3 **2015)**

8  
9 4 **Authors:**

10 5 Maria Michela Gianino<sup>a</sup>, Jacopo Lenzi<sup>b</sup>, Marco Bonaudo<sup>a</sup>, Maria Pia Fantini<sup>b</sup>, Roberta Siliquini<sup>a</sup>,  
11  
12 6 Walter Ricciardi<sup>cd</sup>, Gianfranco Damiani<sup>cd</sup>.

13  
14  
15  
16 7  
17  
18 8 **Maria Michela Gianino, Professor**

19 9 a) Department of Public Health Sciences and Pediatrics, Università di Torino

20  
21 10 Via Santena 5 bis - 10126 Turin (Italy)

22  
23 11 Tel #: +39(0)116705839 - Fax #: +39(0)116705889

24  
25 12 [mariola.gianino@unito.it](mailto:mariola.gianino@unito.it)

26  
27  
28  
29 13  
30  
31  
32 14 **Jacopo Lenzi, PhD**

33 15 b) Department of Biomedical and Neuromotor Sciences, Alma Mater Studiorum - Università di  
34  
35 16 Bologna

36  
37 17 Via Ugo Foscolo 7 - 40123 Bologna (Italy)

38  
39 18 Tel #: +39(0)512094836

40  
41 19 [jacopo.lenzi2@unibo.it](mailto:jacopo.lenzi2@unibo.it)

42  
43  
44  
45 20  
46  
47  
48 21 **Marco Bonaudo, MSN**

49 22 a) Department of Public Health Sciences and Pediatrics, Università di Torino

50  
51 23 Via Santena 5 bis - 10126 Turin (Italy)

52  
53 24 Tel #: +39(0)116705839 - Fax #: +39(0)116705889

54  
55 25 [marco.bonaudo@unito.it](mailto:marco.bonaudo@unito.it)

56  
57  
58  
59  
60 26

1  
2  
3 27 **Maria Pia Fantini, MD, Professor**  
4

5 28 b) Department of Biomedical and Neuromotor Sciences, Alma Mater Studiorum - Università di  
6  
7  
8 29 Bologna

9  
10 30 Via Ugo Foscolo 7 - 40123 Bologna (Italy)

11  
12 31 Tel #: +39(0)512094836

13  
14 32 [mariapia.fantini@unibo.it](mailto:mariapia.fantini@unibo.it)  
15  
16  
17 33

18  
19 34 **Roberta Siliquini, Professor**  
20

21 35 a) Department of Public Health Sciences and Pediatrics, Università di Torino

22  
23  
24 36 Via Santena 5 bis - 10126 Turin (Italy)

25  
26 37 Tel #: +39(0)116705812

27  
28 38 [roberta.siliquini@unito.it](mailto:roberta.siliquini@unito.it)  
29  
30  
31 39

32  
33 40 **Walter Ricciardi, MD, Professor**  
34

35 41 c) Fondazione Policlinico Universitario 'Agostino Gemelli' IRCCS, Roma, Italia

36  
37 42 Largo Agostino Gemelli 8 - 00168 Roma (Italia)

38  
39 43 Tel #: +39(0)630154396

40  
41 44 [walter.ricciardi@unicatt.it](mailto:walter.ricciardi@unicatt.it)  
42  
43  
44 45 **and**

46 46 d) Istituto di Sanità Pubblica, Università Cattolica del Sacro Cuore, Roma, Italia

47  
48 47 Largo Francesco Vito 1 - 00168 Roma (Italia)

49  
50 48 Tel #: +39(0)630154396

51  
52 49 [walter.ricciardi@unicatt.it](mailto:walter.ricciardi@unicatt.it)  
53  
54  
55 50

56  
57  
58 51 **Gianfranco Damiani MD, Professor**  
59

60 52 c) Fondazione Policlinico Universitario 'Agostino Gemelli' IRCCS, Roma, Italia

1  
2  
3  
4  
5  
6  
7  
8  
9  
10  
11  
12  
13  
14  
15  
16  
17  
18  
19  
20  
21  
22  
23  
24  
25  
26  
27  
28  
29  
30  
31  
32  
33  
34  
35  
36  
37  
38  
39  
40  
41  
42  
43  
44  
45  
46  
47  
48  
49  
50  
51  
52  
53  
54  
55  
56  
57  
58  
59  
60

53 Largo Agostino Gemelli 8 - 00168 Roma (Italia)

54 Tel #: +39(0)630154396

55 [gianfranco.damiani@policlinicogemelli.it](mailto:gianfranco.damiani@policlinicogemelli.it)

56 **and**

57 d) Istituto di Sanità Pubblica, Università Cattolica del Sacro Cuore, Roma, Italia

58 Largo Francesco Vito 1 - 00168 Roma (Italia)

59 Tel #: +39(0)630154396

60 [gianfranco.damiani@unicatt.it](mailto:gianfranco.damiani@unicatt.it)

61

62 **Corresponding Author:**

63 **Marco Bonaudo, MSN**

64 a) Department of Public Health Sciences and Pediatrics, Università di Torino

65 Via Santena 5 bis - 10126 Turin (Italy)

66 Tel #: +39(0)116705839 - Fax #: +39(0)116705889

67 [marco.bonaudo@unito.it](mailto:marco.bonaudo@unito.it)

68

69 **Words count paper: 3077**

70 **Words count abstract: 273**

71

72

73

74

75

76

77

78

1  
2  
3 79 **ABSTRACT**  
4

5 80 **Objectives.** To analyse the trends of amenable mortality rates (AMRs) in children over the period  
6  
7  
8 81 2001-2015.  
9

10 82 **Design.** Time trend analysis.  
11

12 83 **Setting.** Thirty-four member countries of the Organisation for Economic Co-operation and  
13  
14 84 Development (OECD).  
15

16  
17 85 **Participants.** Mid-year estimates of the resident population aged  $\leq 14$  years.  
18

19 86 **Primary and secondary outcome measures.** Using data from the World Health Organization  
20  
21 87 Mortality Database and Nolte and McKee's list, AMRs were calculated as the annual number of  
22  
23 88 deaths over the population/100,000 inhabitants. The rates were stratified by age groups (<1, 1–4, 5–  
24  
25 89 9, 10–14 years). All data were summarised by presenting the average rates for the years 2001/2005,  
26  
27 90 2006/2010, and 2011/2015.  
28  
29

30  
31 91 **Results.** There was a significant decline in children's AMRs in the <1-year group in all 34 OECD  
32  
33 92 countries from 2001/2005 to 2006/2010 (332.78 to 295.17/100,000; % $\Delta$  -11.30%; 95% CI -18.75%,  
34  
35 93 - 3.85%) and from 2006/2010 to 2011/2015 (295.17 to 240.22/100,000; % $\Delta$  -18.62%; 95% CI -  
36  
37 94 26.53%, -10.70%), and a slow decline in the other age classes. The only cause of death that was  
38  
39 95 significantly reduced was conditions originating in the early neonatal period for the <1-year group.  
40  
41 96 The age-specific distribution of causes of death did not vary significantly over the study period.  
42  
43

44 97 **Conclusions.** The low decline in amenable mortality rates for children aged  $\geq 1$  year, the large  
45  
46 98 variation in amenable mortality rates across countries and the insufficient success in reducing  
47  
48 99 mortality from all causes suggest that the health system should increase its efforts to enhance child  
49  
50 100 survival. Promoting models of co-management between primary care and subspecialty services,  
51  
52 101 encouraging high-quality healthcare and knowledge, financing universal access to healthcare, and  
53  
54 102 adopting best practice guidelines might help reduce amenable child mortality.  
55  
56  
57

58 103  
59  
60 104 **Strengths and limitations of this study:**

1  
2  
3  
4  
5  
6  
7  
8  
9  
10  
11  
12  
13  
14  
15  
16  
17  
18  
19  
20  
21  
22  
23  
24  
25  
26  
27  
28  
29  
30  
31  
32  
33  
34  
35  
36  
37  
38  
39  
40  
41  
42  
43  
44  
45  
46  
47  
48  
49  
50  
51  
52  
53  
54  
55  
56  
57  
58  
59  
60

- 105 1. This is the first study to analyse trends in child mortality amenable to healthcare.
- 106 2. Thirty-four OECD countries were included in the analyses to provide a thorough depiction of  
107 amenable child mortality in high-income economies.
- 108 3. Mortality was not disaggregated by ethnicity or socioeconomic characteristics.
- 109 4. Making international comparisons is difficult due to variations in birth registration laws and  
110 death certification practices.

111  
112 **Key words:** Amenable mortality, child, childhood, healthcare, healthcare services, OECD countries

## 113 INTRODUCTION

114

115 The health of children and adolescents is an important goal for every society, both because they are  
116 vulnerable and because diseases can affect their quality of life. Measures for protecting and improving  
117 children's and adolescents' health will yield economic and social benefits beyond improved health  
118 outcomes. Indeed, young people have the potential to affect the health of future populations as well  
119 as global economic development unless timely and effective strategies are put into place.[1,2]

120 For the adoption of new strategies and the planning of interventions, information on the  
121 leading causes of death is essential. Many studies have analysed the mortality rates and have  
122 identified the main causes of death of children in specific countries [3] or areas.[4] Studies have  
123 demonstrated that many different factors contribute to child and adolescent mortality [5], including  
124 biological and psychosocial,[6] socioeconomic status,[7,8] environmental and behavioural factors.[9]  
125 In the landscape described, the mortality burden conditioned by the performance of the healthcare  
126 system has not been well investigated. Although there is no indicator that is able to compressively  
127 reflect the performance of the healthcare system, a suitable measurement seems to be the concept of  
128 amenable mortality.

129 Amenable mortality is defined as deaths that, in the light of medical knowledge and  
130 technology at the time of death, could be prevented by timely access to good quality care. The concept  
131 of mortality amenable to healthcare finds its origins in the evolution of the concept of avoidable  
132 mortality, developed by Rutstein et al., who created a list of conditions that were considered either  
133 treatable or preventable through healthcare services given the current medical knowledge and  
134 technology.[10] Rutstein was the first to introduce the term amenable mortality, differentiating  
135 between causes which are responsive to medical intervention through treatment and  
136 secondary/tertiary prevention actions (e.g., cervical cancer, hypertensive disease or appendicitis), and  
137 causes responsive to actions beyond healthcare services (preventable conditions such as lung cancer  
138 and liver cirrhosis).

1  
2  
3 139 In recent years the concept of amenable mortality has been used as a potential indicator of the  
4  
5 140 performance of healthcare systems by several countries. The amenable mortality has been chosen as  
6  
7  
8 141 indicator in the UK National Health Service Outcomes Framework for 2011-2012,[11] and in  
9  
10 142 Australian and New Zealand atlas of avoidable mortality 1997-2001 [12] or in European Community  
11  
12 143 atlas of “avoidable death”. [13] Amenable mortality indicators have also been used to report on spatial  
13  
14  
15 144 and temporal distributions and variations in health system performance across countries,[14–20] as  
16  
17 145 well as across subnational entities,[12,21–25] socio-economic status, ethnic groups and  
18  
19 146 sex.[14,24,26,27] Most of these studies did not assess amenable mortality across ages in different  
20  
21  
22 147 populations and did not focus on child and adolescent age classes.

23  
24 148 According to the World Health Organization (WHO), an estimated 6.3 million children under  
25  
26 149 the age of 15 years died in 2017 (117,000 in the OECD region). Five point four million of these  
27  
28  
29 150 children were under the age of 5, and 2.5 million died within the first month of life. More than half  
30  
31 151 of these early child deaths were due to conditions that could be prevented or treated with access to  
32  
33 152 simple, affordable interventions and were, consequently, amenable.[2]

34  
35 153 The purpose of this study was to analyse the trends of amenable child mortality rates in 34  
36  
37  
38 154 OECD countries from 2001 to 2015, and to evaluate the pattern across age classes.

39  
40 155

41

42 156

43

## 44 157 **MATERIALS AND METHODS**

45  
46

47 158

48

49 159 This descriptive study was conducted using secondary data from 34 OECD countries during the  
50  
51 160 period from 2001 to 2015. Mexico and Turkey, albeit members of the OECD, were not included in  
52  
53  
54 161 the analysis because these countries are not listed among high-income economies in the World  
55  
56 162 Development Indicators dataset (gross national income per capita  $\geq$ \$12,056 for fiscal year 2019)[28]  
57  
58 163 and had limited data availability. The mortality and population data came from the WHO Mortality  
59  
60 164 Database,[29] which comprises deaths registered in national vital registration systems, with the

1  
2  
3 165 underlying causes of death coded according to the International Classification of Diseases; no  
4  
5  
6 166 permission is required from the WHO if data are used for non-commercial purposes. If reference  
7  
8 167 populations were not available in the WHO Mortality Database, the data were extracted from  
9  
10 168 UNdata.[30] The country-level data availability is presented in online supplementary file 1.  
11

12 169 The causes of death amenable to healthcare were selected by means of the list proposed by  
13  
14  
15 170 Nolte and McKee[14,31] and used in a working paper by the OECD to generate estimates of amenable  
16  
17 171 mortality for 31 countries.[15] This list includes a selected number of conditions which are treatable  
18  
19 172 based on the clinical effectiveness of existing medical interventions. The age limit for amenable  
20  
21  
22 173 deaths is set at 75 years for most conditions, such as cancer and cardiovascular diseases, but the age  
23  
24 174 limit for some diseases (i.e., whooping cough, measles, intestinal infections, and respiratory diseases  
25  
26 175 other than pneumonia/influenza) is set at 14 (see online supplementary file 2 for Nolte and McKee's  
27  
28  
29 176 full list). The aggregation of the causes of death operated in the WHO Mortality Database prevents  
30  
31 177 the use of the list of amenable deaths currently adopted by Eurostat.[32]  
32

33 178 For each country, the amenable mortality rates were calculated as the annual number of deaths  
34  
35 179 in the population aged 0–14 years per 100,000 inhabitants. The rates were stratified by the age groups  
36  
37  
38 180 adopted in the WHO Mortality Database (<1, 1–4, 5–9, 10–14 years) and by the 33 disease categories  
39  
40 181 defined by Gay et al.[15] Due to the instability in the estimates of the annual amenable mortality  
41  
42 182 rates, especially for small-population countries, all data were summarised by presenting the average  
43  
44  
45 183 rates for the years 2001/2005, 2006/2010 and 2011/2015. The statistical significance of the percentage  
46  
47 184 changes between these time periods was assessed by using the formula suggested by Hildebrandt et  
48  
49 185 al.[33] Data interpretation focused on the countries that showed significant percentage changes over  
50  
51  
52 186 the entire study period (i.e., both between 2001/05 and 2006/10 and between 2006/10 and 2011/15).  
53  
54 187 Differences in the ranking of age-specific causes of death between time periods were evaluated with  
55  
56 188 the Friedman test.  
57  
58  
59  
60



1  
2  
3  
4  
5  
6  
7  
8  
9  
10  
11  
12  
13  
14  
15  
16  
17  
18  
19  
20  
21  
22  
23  
24  
25  
26  
27  
28  
29  
30  
31  
32  
33  
34  
35  
36  
37  
38  
39  
40  
41  
42  
43  
44  
45  
46  
47  
48  
49  
50  
51  
52  
53  
54  
55  
56  
57  
58  
59  
60

189 All data were analysed using the Stata software package, version 15 (StataCorp. 2017. *Stata*  
190 *Statistical Software: Release 15*. College Station, TX: StataCorp LLC). The significance level was  
191 set at .05.

### 193 **Ethics statement**

194 This descriptive study involved aggregate data that exist in the public domain, where it is not possible  
195 to identify individuals from the information provided. For this reason, this research did not require  
196 ethical approval.

### 198 **Patient and public involvement**

199 Patients and the public were not involved in the design or planning of the study.

## 201 **RESULTS**

### 203 **All-cause amenable child mortality rates**

204 The results of the trend analyses conducted over the five-year periods 2001/05, 2006/10 and 2011/15  
205 are presented in Figure 1 and in online supplementary file 3. The amenable mortality rate of the  
206 OECD population with <1 year dropped significantly from 2001/05 to 2006/10 (332.78 to 295.17 per  
207 100,000, % $\Delta$  = -11.3%) and from 2006/10 to 2011/15 (295.17 to 240.22 per 100,000, % $\Delta$  = -18.6%).  
208 Contrary to the OECD rate of children aged <1 year, in the population aged  $\geq$ 1 year the overall OECD  
209 rate did not decrease significantly. From 2001/05 to 2006/10 and from 2006/10 to 2011/15, the  
210 mortality rates decreased by 13.4% and 13.0%, respectively, in the 1-4 age group; by 11.9% and  
211 11.3% in the 5-9 age group; and by 13.5% and 13.1% for the 10-14 age group. In 2011/15, the OECD  
212 rate was 4.73 per 100,000 for the 1-4 age group, 2.02 per 100,000 for the 5-9 age group, and 2.16 per  
213 100,000 for the 10-14 age group.

### 215 Cause-specific child mortality rates

216 When we examined the distribution of cause-specific mortality rates across multiple age groups and  
 217 study periods, no statistically significant variations in the OECD population were found. The only  
 218 exception was a significant decrease in deaths in the first year of life for conditions originating in the  
 219 early neonatal period (2001/05 to 2006/10: 266.3 to 239.8 per 100,000, % $\Delta$  = -9.9%; 2006/10 to  
 220 2011/15: 239.8 to 193.8 per 100,000, % $\Delta$  = -19.2%) (see online supplementary file 4).

221 Globally, for the years 2001/05, 2006/10 and 2011/15, there were no significant differences  
 222 in the age-specific percentage distribution of causes of death [ $<1$  year: Friedman test ( $P$ ) = 0.955  
 223 (0.372); 1-4 years: 0.864 (0.607); 5-9 years: 0.470 (0.740); 10-14 years: 1.773 (0.398)]. As shown in  
 224 Table 1, the three leading causes of death by age groups over the 15-year study period were the  
 225 following: conditions originating in the early neonatal period, congenital cardiovascular anomalies,  
 226 and pneumonia for children aged  $<1$  year; congenital cardiovascular anomalies, leukaemia, and  
 227 respiratory diseases (excl. pneumonia/flu) for all other age groups.

228 **Table 1** Percentage Distribution of the Top 10 Causes of Death Amenable to Healthcare in Children in 34  
 229 OECD Countries, Years 2001/2005, 2006/2010 and 2011/2015.

| Cause of Death                                       | 2001/05         |       | 2006/10       |       | 2011/15         |       |
|------------------------------------------------------|-----------------|-------|---------------|-------|-----------------|-------|
|                                                      | Rank            | %     | Rank          | %     | Rank            | %     |
| $<1$ Year                                            | (n = 190,169.5) |       | (n = 175,008) |       | (n = 105,210.5) |       |
| Conditions originating in the early neonatal period  | #1              | 80.02 | #1            | 81.25 | #1              | 80.69 |
| Congenital cardiovascular anomalies                  | #2              | 14.38 | #2            | 13.15 | #2              | 14.55 |
| Pneumonia                                            | #3              | 1.82  | #3            | 1.53  | #3              | 1.30  |
| Septicaemia                                          | #4              | 1.50  | #4            | 1.39  | #4              | 1.04  |
| Intestinal infections other than typhoid, diphtheria | #7              | 0.27  | #5            | 0.60  | #5              | 0.72  |
| Cerebrovascular diseases                             | #6              | 0.51  | #6            | 0.60  | #6              | 0.38  |
| Nephritis and nephrosis                              | #5              | 0.54  | #7            | 0.49  | #7              | 0.25  |
| Leukaemia                                            | #8              | 0.21  | #8            | 0.26  | #8              | 0.24  |
| Epilepsy                                             | #9              | 0.17  | #9            | 0.17  | #9              | 0.23  |
| Whooping cough                                       | #11*            | 0.11  | #12*          | 0.10  | #10             | 0.19  |
| Other causes                                         | -               | 0.46  | -             | 0.46  | -               | 0.39  |
| 1-4 Years                                            | (n = 14,438)    |       | (n = 12,738)  |       | (n = 8491.5)    |       |
| Congenital cardiovascular anomalies                  | #1              | 25.67 | #1            | 23.63 | #1              | 25.21 |
| Leukaemia                                            | #3              | 14.55 | #3            | 13.99 | #2              | 14.99 |
| All respiratory diseases, excl. pneumonia/influenza  | #2              | 15.60 | #2            | 16.79 | #3              | 14.25 |
| Pneumonia                                            | #4              | 12.35 | #4            | 12.20 | #4              | 12.24 |
| Epilepsy                                             | #7              | 5.16  | #7            | 5.50  | #5              | 7.20  |
| Septicaemia                                          | #5              | 7.57  | #5            | 8.18  | #6              | 6.88  |
| Conditions originating in the early neonatal period  | #6              | 5.59  | #6            | 5.60  | #7              | 5.06  |
| Intestinal infections other than typhoid, diphtheria | #9              | 2.45  | #9            | 3.05  | #8              | 3.98  |
| Cerebrovascular diseases                             | #8              | 3.86  | #8            | 4.13  | #9              | 3.38  |
| Influenza                                            | #10             | 2.16  | #10           | 1.92  | #10             | 2.39  |
| Other causes                                         | -               | 5.05  | -             | 5.00  | -               | 4.42  |

1  
2  
3  
4  
5  
6  
7  
8  
9  
10  
11  
12  
13  
14  
15  
16  
17  
18  
19  
20  
21  
22  
23  
24  
25  
26  
27  
28  
29  
30  
31  
32  
33  
34  
35  
36  
37  
38  
39  
40  
41  
42  
43  
44  
45  
46  
47  
48  
49  
50  
51  
52  
53  
54  
55  
56  
57  
58  
59  
60  
246

|                                                      | (n = 7705) |       | (n = 6706) |       | (n = 4541) |       |
|------------------------------------------------------|------------|-------|------------|-------|------------|-------|
| 5–9 Years                                            | (n = 7705) |       | (n = 6706) |       | (n = 4541) |       |
| Leukaemia                                            | #1         | 31.72 | #1         | 28.35 | #1         | 27.31 |
| All respiratory diseases, excl. pneumonia/influenza  | #3         | 12.91 | #2         | 16.28 | #2         | 13.87 |
| Congenital cardiovascular anomalies                  | #2         | 14.91 | #3         | 13.67 | #3         | 13.12 |
| Epilepsy                                             | #5         | 7.81  | #5         | 7.86  | #4         | 10.37 |
| Pneumonia                                            | #4         | 8.58  | #4         | 7.90  | #5         | 9.12  |
| Cerebrovascular diseases                             | #6         | 6.87  | #6         | 7.13  | #6         | 6.69  |
| Septicaemia                                          | #7         | 5.15  | #7         | 5.67  | #7         | 5.26  |
| Influenza                                            | #9         | 1.66  | #8         | 2.54  | #8         | 2.97  |
| Conditions originating in the early neonatal period  | #8         | 2.25  | #9         | 2.48  | #9         | 2.80  |
| Intestinal infections other than typhoid, diphtheria | #13†       | 0.87  | #12†       | 1.25  | #10        | 2.00  |
| Other causes                                         | -          | 7.26  | -          | 6.87  | -          | 6.47  |
|                                                      |            |       |            |       |            |       |
| 10–14 Years                                          | (n = 9109) |       | (n = 7579) |       | (n = 4921) |       |
| Leukaemia                                            | #1         | 31.30 | #1         | 30.01 | #1         | 30.24 |
| All respiratory diseases, excl. pneumonia/influenza  | #3         | 13.66 | #2         | 15.28 | #2         | 13.66 |
| Congenital cardiovascular anomalies                  | #2         | 14.13 | #3         | 12.17 | #3         | 12.62 |
| Epilepsy                                             | #5         | 7.73  | #5         | 7.89  | #4         | 10.36 |
| Cerebrovascular diseases                             | #4         | 8.12  | #4         | 8.99  | #5         | 9.08  |
| Pneumonia                                            | #6         | 7.59  | #6         | 6.73  | #6         | 7.27  |
| Septicaemia                                          | #7         | 4.17  | #7         | 4.92  | #7         | 4.29  |
| Diabetes mellitus                                    | #8         | 2.49  | #8         | 2.31  | #8         | 1.97  |
| Influenza                                            | #11‡       | 1.15  | #9         | 2.15  | #9         | 1.77  |
| Conditions originating in the early neonatal period  | #10        | 1.57  | #11‡       | 1.78  | #10        | 1.52  |
| Other causes                                         | -          | 8.09  | -          | 7.78  | -          | 7.21  |

\* Abdominal hernia was ranked #10 in 2001/05 (0.17%) and 2006/10 (0.13%).

† Nephritis and nephrosis were ranked #10 in 2001/05 (1.60%) and 2006/10 (1.69%).

‡ Nephritis and nephrosis were ranked #9 in 2001/05 (1.79%) and #10 in 2006/10 (1.91%).

### Country-specific amenable child mortality rates

As shown in Figure 1 and online supplementary file 3, the amenable mortality rate for the population aged <1 year dropped significantly over the entire study period in 15 countries (United States, Israel, Japan, South Korea, Czechia, Estonia, Germany, Italy, Latvia, Hungary, Poland, Spain, Austria, United Kingdom and Australia). In addition to the decrease in conditions originating in the early neonatal period, other causes contributed to a significant reduction in mortality for some of these countries: septicaemia, pneumonia and nephritis/nephrosis in the United States, septicaemia in Poland, and congenital cardiovascular anomalies in Japan and Spain. See online supplementary file 4 for country-specific and cause-specific mortality rates in the <1-year population.

Although the overall OECD rate did not decrease significantly in the population aged  $\geq 1$  year, some country-specific data exhibited significant trends (Figure 1). However, no country showed a significant linear decline in mortality over the entire study period for all age groups (Figure 1).

1  
2  
3 247 **Figure 1** Yearly Amenable Mortality Rates (Per 100,000) for Ages <1 (a), 1–4 (b), 5–9 (c) and 10–14 (d) in 34 OECD  
4 248 Countries, 2001/2005, 2006/2010 and 2011/2015 (See Online Supplementary File 1 for Country-Level Data  
5 249 Availability)

6 250  
7 251 \* Percentage decrease is statistically significant ( $P < .05$ ).

8 252 *Abbreviations:* CA, Canada; CL, Chile; US, United State of America; IL, Israel; JP, Japan; KR, Republic of Korea; AT, Austria; BE, Belgium; CZ,  
9 253 Czechia; DK, Denmark; EE, Estonia; FI, Finland; FR, France; DE, Germany; GR, Greece; HU, Hungary; IS, Iceland; IE, Ireland; IT, Italy; LV,  
10 254 Latvia; LT, Lithuania; LU, Luxembourg; NL, Netherlands; NO, Norway; PL, Poland; PT, Portugal; SK, Slovakia; SI, Slovenia; ES, Spain; SE,  
11 255 Sweden; CH, Switzerland; GB, United Kingdom; AU, Australia; NZ, New Zealand.

## 12 13 257 **DISCUSSION**

14  
15 258  
16  
17  
18 259 In this time trend analysis, we found a significant decline in amenable child mortality rates for the  
19  
20 260 <1-year age group in the 34 OECD countries between 2001/05 and 2011/15, and a slow decline in  
21  
22 261 the other age groups. These results confirm the trend shown by previous studies conducted on six  
23  
24  
25 262 OECD countries that had been selected to provide a variety of forms of healthcare delivery between  
26  
27 263 1956 and 1980,[21] and highlight that policies to reduce amenable mortality rates are still needed,  
28  
29 264 even in settings where the quality of medical services and resources is high.

30  
31  
32 265 These results are driven by the fact that the only significantly reduced cause of death was  
33  
34 266 conditions originating in the early neonatal period in the <1-year group. Surprisingly, the decline was  
35  
36 267 not more pronounced among countries with higher mortality in 2001/05, indicating that continued  
37  
38  
39 268 gains in child survival occurred both in low- and high-mortality countries. The most representative  
40  
41 269 countries are Japan, which showed an improvement in its performance despite starting from low  
42  
43 270 values in 2001/05, and Hungary and the US, which showed high amenable mortality rates in 2001/05.

44  
45 271 The results concerning country-specific amenable child mortality rates showed that the  
46  
47  
48 272 reductions in the age-specific rates were not evenly distributed across OECD countries. There was  
49  
50 273 not a single cause for which the age-specific mortality rates declined in the countries studied, and the  
51  
52 274 success in reducing mortality rates was not consistent for all causes. These achievements corroborate  
53  
54  
55 275 another of our results, highlighting that the causal distribution of the age-specific mortality rates did  
56  
57 276 not vary over the period examined and that, namely, the conditions originating in the early neonatal  
58  
59 277 period, congenital cardiovascular anomalies, pneumonia, leukaemia, and all respiratory diseases  
60  
278 (excl. pneumonia/influenza) were consistently top-ranked. Because these are the main causes related

1  
2  
3 279 to chronic disorders and pathologies that require acute care delivered quickly, our results suggest that  
4  
5 280 the models of care for children should be revised. Sidebotham has argued that child diseases might  
6  
7  
8 281 broadly be divided into chronic (e.g., leukaemia) and acute diseases (e.g., pneumonia), and that a  
9  
10 282 single model cannot be proposed but each needs a different, albeit interconnected, health system  
11  
12 283 solution.[5]

14  
15 284 Wolfe [34] highlights that the presence of children with chronic disorders requires substantial  
16  
17 285 changes from a hospital-centric model to a model in which primary care and secondary care providers  
18  
19 286 and public health services work closely together. Models of co-management are essential to promote  
20  
21  
22 287 ongoing communication and coordination between primary care and subspecialty services. It would  
23  
24 288 be inefficient for subspecialists to provide primary care, and ineffective for primary care providers to  
25  
26 289 attempt to stay abreast of the latest therapies for chronic diseases. Because the majority of chronic  
27  
28  
29 290 illness care is performed within the primary care setting and because primary care physicians spend  
30  
31 291 a considerable amount of time treating chronic illness, primary care should play a central role in the  
32  
33 292 overall coordination and continuity of people's care providing greater access to specialists and more  
34  
35 293 timely follow-up care after emergency room visits.[35] The few studies evaluating this new approach  
36  
37  
38 294 to work showed an improvement in child survival [36–38], and thus traced a possible path to improve  
39  
40 295 amenable mortality from chronic diseases.

42 296 Sidebotham and Mackenbach judge as determinants of amenable mortality in acute diseases  
43  
44 297 the universal access to healthcare and the presence of professionals with appropriate training.[5,18]  
45  
46  
47 298 The relevance of access may at least partially explain our results in some countries. For example, in  
48  
49 299 Chile, where the mortality rate of pneumonia was consistently high for the <1-year group, the  
50  
51 300 healthcare system replicates class inequalities. Studies have identified and tracked several important  
52  
53  
54 301 inequalities in the burden of infant mortality for infectious diseases by socioeconomic level in Chile,  
55  
56 302 showing that this gap is discriminatory because disadvantaged households underutilise healthcare  
57  
58 303 services (due to social or economic exclusion).[39,40] In Slovakia, where also the mortality rate of  
59  
60 304 pneumonia was high for the <1-year group, social health insurance system formally covers all

1  
2  
3 305 residents and has a benefit package that all insurance companies must provide for their insured. In  
4  
5 306 theory, the insurance system is thus designed to provide everybody with the same benefit package,  
6  
7 307 regardless of their health status, ability to pay or place of residence. In practice, coverage varies across  
8  
9  
10 308 the country, mainly because the supply of human resources (especially specialists and general  
11  
12 309 practitioners [GPs]) is not adequate in all regions and districts, and sometimes providers are simply  
13  
14  
15 310 not available.[41]

16  
17 311 The access to healthcare professionals with adequate training looks at the models of first  
18  
19 312 contact between patients and clinicians and on their expertise. Although an international debate is  
20  
21  
22 313 open on the best pattern of paediatric primary care among a paediatrician-based system, a combined  
23  
24 314 system or a system based on GPs/family doctors,[42] some authors highlight the importance of  
25  
26 315 primary care paediatricians, especially because primary care paediatricians who look after children  
27  
28 316 are likely to have more professional training and competencies than GPs, who often, receiving an  
29  
30  
31 317 insufficient or not existing or non-mandatory training, do not have capabilities to diagnose and treat  
32  
33 318 a child in effective times.[34,43,44]

34  
35 319 Supported by the specialised literature, the availability of high-quality healthcare and  
36  
37 320 knowledge and the use of best practice guidelines are also determinants of amenable mortality.[5,18]  
38  
39  
40 321 These determinants provide one possible explanation for our results, in particular for the reduction in  
41  
42 322 mortality by conditions originating in the early neonatal period. Several lines of evidence support the  
43  
44  
45 323 hypothesis that neonatal intensive care has resulted in decreased mortality. Marked declines in  
46  
47 324 neonatal and infant mortality rates are coincident with the introduction and progressive development  
48  
49 325 of neonatal intensive care [45,46] and with specific neonatal intensive therapeutic improvements.[47–  
50  
51 326 50] The second line of evidence regarding the effect of neonatal intensive care on infant mortality is  
52  
53  
54 327 the observation that low birth weight infants born in hospitals with tertiary level neonatal intensive  
55  
56 328 care units have lower mortality rates than infants born in hospitals without such units. [51,52] Finally,  
57  
58 329 a third line of evidence referring to improving high-risk obstetric care has been associated with  
59  
60 330 decreases in neonatal mortality.[46,53]

1  
2  
3  
4  
5  
6  
7  
8  
9  
10  
11  
12  
13  
14  
15  
16  
17  
18  
19  
20  
21  
22  
23  
24  
25  
26  
27  
28  
29  
30  
31  
32  
33  
34  
35  
36  
37  
38  
39  
40  
41  
42  
43  
44  
45  
46  
47  
48  
49  
50  
51  
52  
53  
54  
55  
56  
57  
58  
59  
60

331 Variations in child mortality exist even in countries where high-quality healthcare is available.  
332 Part of this variation may be due to a failure in implementing treatment protocols or evidence-based  
333 best practices tailored with the local conditions. This suggestion may provide some explanation of  
334 the mortality decrease in some countries, such as Hungary and Japan, which have supported the  
335 introduction of evidence-based protocols on routine newborn care and have trained nursery staff  
336 members on the protocols.[54,55]

337 Our study has the same limitations as all studies that use secondary data. It is undeniable that  
338 international variations in birth registration laws and practices and the process of death certification  
339 have the potential to bias the international comparisons of child mortality. Additionally, international  
340 comparisons of mortality rates are confounded by the various ways in which countries classify  
341 preterm infants near the threshold of viability.[56–58] Considering these issues, our study only  
342 evaluates the trend of amenable mortality rates, and a comparison analysis was not performed. Also,  
343 although much of the literature assessing the contribution of healthcare to health focuses on mortality  
344 data, data on children may be of limited value because the number of deaths is small, making  
345 interpretation difficult. However, we believe that the small numbers were mitigated by the fact that  
346 our study analysed the rates and trajectories of multiple countries over a 15-year time period. Another  
347 limitation is that our analysis did not account for mortality disparities within countries that were  
348 attributable to ethnicity, race, socioeconomic status or geographic residence, since our data sources  
349 did not this information. Evidence from the US, for example, showed higher levels of amenable  
350 mortality among people disadvantaged in terms of race or socioeconomic status.[59,60] Considering  
351 that the perinatal mortality of the US has a prevailing effect on premature births and that striking  
352 racial disparities persist, with African Americans exhibiting higher rates of preterm delivery than any  
353 other major racial/ethnic group,[61] potentially large variations within populations may be concealed.  
354 Lastly, our study is based on the definition of amenable death in its original sense of mortality  
355 responsive to medical intervention through treatment, although several countries, such as UK, Canada  
356 and Australia, have broadened definitions for their avoidable mortality indicators to include deaths

1  
2  
3 357 from conditions avoidable through primary prevention. This broadened definition suggests that not  
4  
5 358 only the models of care for children should be revised but also that policies must be adopted in order  
6  
7  
8 359 to prevent specific causes of death before the point of reaching the healthcare system. These policies  
9  
10 360 include population health interventions such as the obligation of physical activity during adolescence  
11  
12 361 in schools, or the taxation of tobacco and sugar-sweetened beverages.

14  
15 362 Some preliminary conclusions can be drawn from this study. Over the 15-year period from  
16  
17 363 2001 to 2015, the amenable mortality rate in <1-year-olds progressively declined in most OECD  
18  
19 364 countries. Second, OECD countries had success in reducing mortality from conditions originating in  
20  
21  
22 365 the early neonatal period. Lastly, the low decline in amenable mortality rates for children aged  $\geq 1$   
23  
24 366 year, the high variation in amenable mortality rates across countries and the insufficient success in  
25  
26 367 reducing mortality from all causes suggest that the health system should increase its efforts to improve  
27  
28 368 health outcomes for children.



1  
2  
3 369 **DECLARATIONS**

4  
5 370 **Ethics approval and consent to participate**

6  
7  
8 371 Not applicable.

9  
10 372 **Availability of data and materials**

11  
12 373 The datasets used and/or analysed during the current study are available from the corresponding  
13  
14 author on reasonable request.

15 374  
16  
17 375 **Competing interests**

18  
19 376 The authors declare that they have no competing interests.

20  
21 377 **Funding**

22  
23  
24 378 This research received no specific grant from any funding agency in the public, commercial or not-  
25  
26 379 for-profit sectors.

27  
28 380 **Acknowledgements**

29  
30 381 Data for this study came from the World Health Organization. All analyses, interpretations and  
31  
32 conclusions are credited to the authors of this study, not to the World Health Organization.

33 382  
34  
35 383 **Author Contributions**

36  
37 384 MMG and GD formulated the research goals and supervised the research activity; MMG, GD, JL  
38  
39 defined the design of the methodology; MMG wrote the article; RS, WR and MPF revised the  
40 385 article; MB collected the data and managed the database; JL utilised statistical techniques to analyse  
41  
42 386 the study data.  
43  
44

45 387  
46  
47 388 All authors have read and approved the manuscript.  
48  
49  
50  
51  
52  
53  
54  
55  
56  
57  
58  
59  
60

389 **REFERENCES**

- 390 1 Blum RW, Nelson-Mmari K. The health of young people in a global context. *J Adolesc Health*  
391 *Off Publ Soc Adolesc Med* 2004;**35**:402–18. doi:10.1016/j.jadohealth.2003.10.007
- 392 2 WHO. Children: reducing mortality. [http://www.who.int/news-room/fact-sheets/detail/children-](http://www.who.int/news-room/fact-sheets/detail/children-reducing-mortality)  
393 [reducing-mortality](http://www.who.int/news-room/fact-sheets/detail/children-reducing-mortality) (accessed 3 Oct 2018).
- 394 3 Fraser J, Sidebotham P, Frederick J, *et al*. Learning from child death review in the USA, England,  
395 Australia, and New Zealand. *Lancet Lond Engl* 2014;**384**:894–903. doi:10.1016/S0140-  
396 6736(13)61089-2
- 397 4 Kyu HH, Stein CE, Pinto CB, *et al*. Causes of death among children aged 5–14 years in the WHO  
398 European Region: a systematic analysis for the Global Burden of Disease Study 2016. *Lancet*  
399 *Child Adolesc Health* 2018;**2**:321–37. doi:10.1016/S2352-4642(18)30095-6
- 400 5 Sidebotham P, Fraser J, Covington T, *et al*. Understanding why children die in high-income  
401 countries. *The Lancet* 2014;**384**:915–27. doi:10.1016/S0140-6736(14)60581-X
- 402 6 Alio AP, Richman AR, Clayton HB, *et al*. An ecological approach to understanding black-white  
403 disparities in perinatal mortality. *Matern Child Health J* 2010;**14**:557–66. doi:10.1007/s10995-  
404 009-0495-9
- 405 7 Gakidou E, Cowling K, Lozano R, *et al*. Increased educational attainment and its effect on child  
406 mortality in 175 countries between 1970 and 2009: a systematic analysis. *Lancet Lond Engl*  
407 2010;**376**:959–74. doi:10.1016/S0140-6736(10)61257-3
- 408 8 Lightfoot TJ, Johnston WT, Simpson J, *et al*. Survival from childhood acute lymphoblastic  
409 leukaemia: the impact of social inequality in the United Kingdom. *Eur J Cancer* 2012;**48**:263–9.  
410 doi:10.1016/j.ejca.2011.10.007
- 411 9 Gore FM, Bloem PJN, Patton GC, *et al*. Global burden of disease in young people aged 10-24  
412 years: a systematic analysis. *Lancet Lond Engl* 2011;**377**:2093–102. doi:10.1016/S0140-  
413 6736(11)60512-6

- 1  
2  
3 414 10 Rutstein DD, Berenberg W, Chalmers TC, *et al.* Measuring the quality of medical care. A clinical  
4  
5 415 method. *N Engl J Med* 1976;**294**:582–8. doi:10.1056/NEJM197603112941104  
6  
7  
8 416 11 Department of Health. The NHS Outcomes Framework 2011/12.  
9  
10 417 2010. [https://assets.publishing.service.gov.uk/government/uploads/system/uploads/attachment\\_d](https://assets.publishing.service.gov.uk/government/uploads/system/uploads/attachment_data/file/213789/dh_123138.pdf)  
11  
12 418 [ata/file/213789/dh\\_123138.pdf](https://assets.publishing.service.gov.uk/government/uploads/system/uploads/attachment_data/file/213789/dh_123138.pdf)  
13  
14  
15 419 12 Page A, New Zealand, University of Adelaide, editors. *Australian and New Zealand atlas of*  
16  
17 420 *avoidable mortality*. Adelaide, S. Aust.: : Public Health Information Development Unit,  
18  
19 421 University of Adelaide 2006.  
20  
21  
22 422 13 Holland WW. European Community atlas of “avoidable death.” 1991.  
23  
24 423 14 Nolte E, McKee CM. Measuring the health of nations: updating an earlier analysis. *Health Aff*  
25  
26 424 *Proj Hope* 2008;**27**:58–71. doi:10.1377/hlthaff.27.1.58  
27  
28  
29 425 15 Gay JG, Paris V, Devaux M, *et al.* Mortality Amenable to Health Care in 31 OECD Countries:  
30  
31 426 estimates and methodological Issues. Published Online First: 31 January 2011.  
32  
33 427 doi:<https://doi.org/10.1787/5kgj35f9f8s2-en>  
34  
35  
36 428 16 Treurniet H, Boshuizen H, Harteloh P. Avoidable mortality in Europe (1980–1997): a comparison  
37  
38 429 of trends. *J Epidemiol Community Health* 2004;**58**:290–5. doi:10.1136/jech.2002.006452  
39  
40 430 17 Nolte E, McKee M. Variations in amenable mortality--trends in 16 high-income nations. *Health*  
41  
42 431 *Policy Amst Neth* 2011;**103**:47–52. doi:10.1016/j.healthpol.2011.08.002  
43  
44  
45 432 18 Mackenbach JP, Hoffmann R, Khoshaba B, *et al.* Using “amenable mortality” as indicator of  
46  
47 433 healthcare effectiveness in international comparisons: results of a validation study. *J Epidemiol*  
48  
49 434 *Community Health* 2013;**67**:139–46. doi:10.1136/jech-2012-201471  
50  
51  
52 435 19 Mackenbach JP, Bouvier-Colle MH, Jouglu E. “Avoidable” mortality and health services: a  
53  
54 436 review of aggregate data studies. *J Epidemiol Community Health* 1990;**44**:106–11.  
55  
56 437 20 Gianino MM, Lenzi J, Muça A, *et al.* Declining Amenable Mortality: Time Trend (2000-2013)  
57  
58 438 and Geographic Area Analysis. *Health Serv Res* 2017;**52**:1908–27. doi:10.1111/1475-  
59  
60 439 6773.12563

1

2

- 3 440 21 Charlton JR, Velez R. Some international comparisons of mortality amenable to medical  
4  
5 441 intervention. *Br Med J Clin Res Ed* 1986;**292**:295–301.
- 7  
8 442 22 James PD, Manuel DG, Mao Y. Avoidable mortality across Canada from 1975 to 1999. *BMC*  
9  
10 443 *Public Health* 2006;**6**:137. doi:10.1186/1471-2458-6-137
- 12 444 23 Pampalon R. Avoidable mortality in Québec and its regions. *Soc Sci Med* 1993;**37**:823–31.  
13  
14 445 doi:10.1016/0277-9536(93)90376-F
- 16  
17 446 24 Piers LS, Carson NJ, Brown K, *et al*. Avoidable mortality in Victoria between 1979 and 2001.  
18  
19 447 *Aust N Z J Public Health* 2007;**31**:5–12.
- 21 448 25 Fantini MP, Lenzi J, Franchino G, *et al*. Amenable mortality as a performance indicator of Italian  
22  
23 health-care services. *BMC Health Serv Res* 2012;**12**:310. doi:10.1186/1472-6963-12-310
- 25  
26 450 26 Tobias M, Jackson G. Avoidable mortality in New Zealand, 1981-97. *Aust N Z J Public Health*  
27  
28 451 2001;**25**:12–20. doi:10.1111/j.1467-842X.2001.tb00543.x
- 30  
31 452 27 Schoenbaum SC, Schoen C, Nicholson JL, *et al*. Mortality amenable to health care in the United  
32  
33 453 States: The roles of demographics and health systems performance. *J Public Health Policy*  
34  
35 454 2011;**32**:407–29.
- 37  
38 455 28 World Bank. World Development Indicators | DataBank.  
39  
40 456 2018.<http://databank.worldbank.org/data/reports.aspx?source=world-development-indicators>  
41  
42 457 (accessed 3 Oct 2018).
- 44  
45 458 29 World Health Organization. WHO Mortality Database.  
46  
47 459 2018.[http://www.who.int/healthinfo/mortality\\_data/en/](http://www.who.int/healthinfo/mortality_data/en/) (accessed 3 Oct 2018).
- 48  
49 460 30 United Nations. Demographic Statistics Database.  
50  
51 461 2018.<http://data.un.org/Data.aspx?d=POP&f=tableCode%3A22> (accessed 3 Oct 2018).
- 53  
54 462 31 Nolte E, McKee M. *Does health care save lives? Avoidable mortality revisited*. The Nuffield  
55  
56 463 Trust 2004. <http://researchonline.lshtm.ac.uk/15535/> (accessed 3 Oct 2018).
- 57  
58 464 32 Eurostat. Amenable and preventable deaths of residents.  
59  
60 465 [https://ec.europa.eu/eurostat/web/products-datasets/-/hlth\\_cd\\_apr](https://ec.europa.eu/eurostat/web/products-datasets/-/hlth_cd_apr) (accessed 3 Oct 2018).

- 1  
2  
3 466 33 Hildebrandt M, Bender R, Gehrman U, *et al.* Calculating confidence intervals for impact  
4  
5 467 numbers. *BMC Med Res Methodol* 2006;**6**:32. doi:10.1186/1471-2288-6-32  
6  
7  
8 468 34 Wolfe I, Thompson M, Gill P, *et al.* Health services for children in western Europe. *Lancet Lond*  
9  
10 469 *Engl* 2013;**381**:1224–34. doi:10.1016/S0140-6736(12)62085-6  
11  
12 470 35 Expert Panel on Effective Ways of Investing in Health. Definition of a frame of Reference in  
13  
14 relation to Primary Care with a special emphasis on Financing Systems and Referral Systems.  
15 471 2014.[https://ec.europa.eu/health/expert\\_panel/sites/expertpanel/files/004\\_definitionprimarycare](https://ec.europa.eu/health/expert_panel/sites/expertpanel/files/004_definitionprimarycare_en.pdf)  
16  
17 472 [\\_en.pdf](https://ec.europa.eu/health/expert_panel/sites/expertpanel/files/004_definitionprimarycare_en.pdf) (accessed 2 Mar 2019).  
18  
19 473  
20  
21 474 36 Adams J, Woods E. Redesign of chronic illness care in children and adolescents. *Curr Opin*  
22  
23 *Pediatr* 2016;**28**:428–33. doi:10.1097/MOP.0000000000000368  
24 475  
25  
26 476 37 Britto MT, Vockell A-LB, Munafo JK, *et al.* Improving outcomes for underserved adolescents  
27  
28 with asthma. *Pediatrics* 2014;**133**:e418-427. doi:10.1542/peds.2013-0684  
29 477  
30  
31 478 38 Mangione-Smith R, Schonlau M, Chan KS, *et al.* Measuring the effectiveness of a collaborative  
32  
33 479 for quality improvement in pediatric asthma care: does implementing the chronic care model  
34  
35 480 improve processes and outcomes of care? *Ambul Pediatr Off J Ambul Pediatr Assoc* 2005;**5**:75–  
36  
37 82. doi:10.1367/A04-106R.1  
38 481  
39  
40 482 39 Hertel-Fernandez AW, Giusti AE, Sotelo JM. The Chilean infant mortality decline: improvement  
41  
42 483 for whom? Socioeconomic and geographic inequalities in infant mortality, 1990-2005. *Bull*  
43  
44 484 *World Health Organ* 2007;**85**:798–804.  
45  
46  
47 485 40 Rodrigo A, van der Veer R, Vermeer HJ, *et al.* From foundling homes to day care: a historical  
48  
49 486 review of childcare in Chile. *Cad Saúde Pública*;**30**:461–72.  
50  
51  
52 487 41 OECD. State of Health in the EU Slovak Republic: Country Health Profile 2017 - European  
53  
54 488 Observatory on Health Systems and Policies. 2017.  
55  
56 489 42 Katz M, Rubino A, Collier J, *et al.* Demography of pediatric primary care in Europe: delivery of  
57  
58 490 care and training. *Pediatrics* 2002;**109**:788–96.  
59  
60

1

2

3

4

5

6

7

8

9

10

11

12

13

14

15

16

17

18

19

20

21

22

23

24

25

26

27

28

29

30

31

32

33

34

35

36

37

38

39

40

41

42

43

44

45

46

47

48

49

50

51

52

53

54

55

56

57

58

59

60

- 43 Pearson GA, Ward-Platt M, Harnden A, *et al.* Why children die: avoidable factors associated with child deaths. *Arch Dis Child* 2011;**96**:927–31. doi:10.1136/adc.2009.177071
- 44 van Esso D, del Torso S, Hadjipanayis A, *et al.* Paediatric primary care in Europe: variation between countries. *Arch Dis Child* 2010;**95**:791–5. doi:10.1136/adc.2009.178459
- 45 Williams RL, Chen PM. Identifying the Sources of the Recent Decline in Perinatal Mortality Rates in California. *N Engl J Med* 1982;**306**:207–14. doi:10.1056/NEJM198201283060404
- 46 Richardson DK, Gray JE, Gortmaker SL, *et al.* Declining severity adjusted mortality: evidence of improving neonatal intensive care. *Pediatrics* 1998;**102**:893–9.
- 47 Horbar JD, Wright LL, Soll RF, *et al.* A multicenter randomized trial comparing two surfactants for the treatment of neonatal respiratory distress syndrome. National Institute of Child Health and Human Development Neonatal Research Network. *J Pediatr* 1993;**123**:757–66.
- 48 Vermont-Oxford Neonatal Network. A multicenter, randomized trial comparing synthetic surfactant with modified bovine surfactant extract in the treatment of neonatal respiratory distress syndrome. *Pediatrics* 1996;**97**:1–6.
- 49 Clark RH, Yoder BA, Sell MS. Prospective, randomized comparison of high-frequency oscillation and conventional ventilation in candidates for extracorporeal membrane oxygenation. *J Pediatr* 1994;**124**:447–54.
- 50 Rastogi A, Akintorin SM, Bez ML, *et al.* A Controlled Trial of Dexamethasone to Prevent Bronchopulmonary Dysplasia in Surfactant-treated Infants. *Pediatrics* 1996;**98**:204–10.
- 51 Phibbs CS, Baker LC, Caughey AB, *et al.* Level and volume of neonatal intensive care and mortality in very-low-birth-weight infants. *N Engl J Med* 2007;**356**:2165–75. doi:10.1056/NEJMsa065029
- 52 Paneth N. Technology at birth. *Am J Public Health* 1990;**80**:791–2.
- 53 Alfirevic Z, Neilson JP. Doppler ultrasonography in high-risk pregnancies: systematic review with meta-analysis. *Am J Obstet Gynecol* 1995;**172**:1379–87.

- 1  
2  
3 516 54 Kuchna D, Hovsepyan A, Leonard S. Preventing Newborn Deaths In Romania And Hungary.  
4  
5 517 *Health Aff (Millwood)* 2017;**36**:1160–1160. doi:10.1377/hlthaff.2017.0382  
6  
7  
8 518 55 Maeda K. Progress of Perinatal Medicine in Japan. *J Health Med Inform* 2013;**s11**.  
9  
10 519 doi:10.4172/2157-7420.S11-002  
11  
12 520 56 Kramer MS, Platt RW, Yang H, *et al*. Registration artifacts in international comparisons of infant  
13  
14 mortality. *Paediatr Perinat Epidemiol* 2002;**16**:16–22. doi:10.1046/j.1365-3016.2002.00390.x  
15 521  
16  
17 522 57 Joseph KS, Liu S, Rouleau J, *et al*. Influence of definition based versus pragmatic birth  
18  
19 523 registration on international comparisons of perinatal and infant mortality: population based  
20  
21 524 retrospective study. *The BMJ* 2012;**344**. doi:10.1136/bmj.e746  
22  
23  
24 525 58 Mohangoo AD, Blondel B, Gissler M, *et al*. International Comparisons of Fetal and Neonatal  
25  
26 526 Mortality Rates in High-Income Countries: Should Exclusion Thresholds Be Based on Birth  
27  
28 527 Weight or Gestational Age? *PLOS ONE* 2013;**8**:e64869. doi:10.1371/journal.pone.0064869  
29  
30  
31 528 59 Schwartz E, Kofie VY, Rivo M, *et al*. Black/white comparisons of deaths preventable by medical  
32  
33 529 intervention: United States and the District of Columbia 1980-1986. *Int J Epidemiol*  
34  
35 530 1990;**19**:591–8. doi:10.1093/ije/19.3.591  
36  
37  
38 531 60 Macinko J, Elo IT. Black–white differences in avoidable mortality in the USA, 1980–2005. *J*  
39  
40 532 *Epidemiol Community Health* 2009;**63**:715–21. doi:10.1136/jech.2008.081141  
41  
42 533 61 Riddell CA, Harper S, Kaufman JS. Trends in Differences in US Mortality Rates Between Black  
43  
44 534 and White Infants. *JAMA Pediatr* 2017;**171**:911–3. doi:10.1001/jamapediatrics.2017.1365  
45  
46  
47 535  
48  
49  
50  
51  
52  
53  
54  
55  
56  
57  
58  
59  
60



\* Percentage decrease is statistically significant (P<.05).

Abbreviations: CA, Canada; CL, Chile; US, United State of America; IL, Israel; JP, Japan; KR, Republic of Korea; AT, Austria; BE, Belgium; CZ, Czechia; DK, Denmark; EE, Estonia; FI, Finland; FR, France; DE, Germany; GR, Greece; HU, Hungary; IS, Iceland; IE, Ireland; IT, Italy; LV, Latvia; LT, Lithuania; LU, Luxembourg; NL, Netherlands; NO, Norway; PL, Poland; PT, Portugal; SK, Slovakia; SI, Slovenia; ES, Spain; SE, Sweden; CH, Switzerland; GB, United Kingdom; AU, Australia; NZ, New Zealand.

203x279mm (300 x 300 DPI)



**Table 1** Data Availability for the 34 OECD Countries (0 “Not Available”/1 “Available”)

| Country                   | Year      |           |           |           |           |           |           |           |           |           |           |           |           |           |           | Total      |
|---------------------------|-----------|-----------|-----------|-----------|-----------|-----------|-----------|-----------|-----------|-----------|-----------|-----------|-----------|-----------|-----------|------------|
|                           | 2001      | 2002      | 2003      | 2004      | 2005      | 2006      | 2007      | 2008      | 2009      | 2010      | 2011      | 2012      | 2013      | 2014      | 2015      |            |
| Canada                    | 1         | 1         | 1         | 1         | 1         | 1         | 1         | 1         | 1         | 1         | 1         | 1         | 1         | 0         | 0         | 13         |
| Chile                     | 1         | 1         | 1         | 1         | 1         | 1         | 1         | 1         | 1         | 1         | 1         | 1         | 1         | 1         | 1         | 15         |
| United States of America  | 1         | 1         | 1         | 1         | 1         | 1         | 1         | 1         | 1         | 1         | 0         | 1         | 0         | 0         | 1         | 12         |
| Israel                    | 1         | 1         | 1         | 1         | 1         | 1         | 1         | 1         | 1         | 1         | 1         | 1         | 1         | 1         | 1         | 15         |
| Japan                     | 1         | 1         | 1         | 1         | 1         | 1         | 1         | 1         | 1         | 1         | 1         | 1         | 1         | 1         | 1         | 15         |
| Republic of Korea         | 1         | 1         | 1         | 1         | 1         | 1         | 1         | 1         | 1         | 1         | 1         | 1         | 1         | 1         | 1         | 15         |
| Austria                   | 1         | 1         | 1         | 1         | 1         | 1         | 1         | 1         | 1         | 1         | 1         | 1         | 1         | 1         | 1         | 15         |
| Belgium                   | 1         | 1         | 1         | 1         | 1         | 1         | 1         | 1         | 1         | 1         | 1         | 1         | 1         | 1         | 1         | 15         |
| Czechia                   | 1         | 1         | 1         | 1         | 1         | 1         | 1         | 1         | 1         | 1         | 1         | 1         | 1         | 1         | 1         | 15         |
| Denmark                   | 1         | 1         | 1         | 1         | 1         | 1         | 1         | 1         | 1         | 1         | 1         | 1         | 1         | 1         | 1         | 15         |
| Estonia                   | 1         | 1         | 1         | 1         | 1         | 1         | 1         | 1         | 1         | 1         | 1         | 1         | 1         | 1         | 1         | 15         |
| Finland                   | 1         | 1         | 1         | 1         | 1         | 1         | 1         | 1         | 1         | 1         | 1         | 1         | 1         | 1         | 1         | 15         |
| France                    | 1         | 1         | 1         | 1         | 1         | 1         | 1         | 1         | 1         | 1         | 1         | 1         | 1         | 1         | 0         | 14         |
| Germany                   | 1         | 1         | 1         | 1         | 1         | 1         | 1         | 1         | 1         | 1         | 1         | 1         | 1         | 1         | 1         | 15         |
| Greece                    | 1         | 1         | 1         | 1         | 1         | 1         | 1         | 1         | 1         | 1         | 1         | 1         | 1         | 1         | 1         | 15         |
| Hungary                   | 1         | 1         | 1         | 1         | 1         | 1         | 1         | 1         | 1         | 1         | 1         | 1         | 1         | 1         | 1         | 15         |
| Iceland                   | 1         | 1         | 1         | 1         | 1         | 1         | 1         | 1         | 1         | 1         | 1         | 1         | 1         | 1         | 1         | 15         |
| Ireland                   | 1         | 1         | 1         | 1         | 1         | 1         | 1         | 1         | 1         | 1         | 1         | 1         | 1         | 1         | 0         | 14         |
| Italy                     | 1         | 1         | 1         | 1         | 1         | 1         | 1         | 1         | 1         | 1         | 1         | 1         | 1         | 1         | 1         | 15         |
| Latvia                    | 1         | 1         | 1         | 1         | 1         | 1         | 1         | 1         | 1         | 1         | 1         | 1         | 1         | 1         | 1         | 15         |
| Lithuania                 | 1         | 1         | 1         | 1         | 1         | 1         | 1         | 1         | 1         | 1         | 1         | 1         | 1         | 1         | 1         | 15         |
| Luxembourg                | 1         | 1         | 1         | 1         | 1         | 1         | 1         | 1         | 1         | 1         | 1         | 1         | 1         | 1         | 1         | 15         |
| Netherlands               | 1         | 1         | 1         | 1         | 1         | 1         | 1         | 1         | 1         | 1         | 1         | 1         | 1         | 1         | 1         | 15         |
| Norway                    | 1         | 1         | 1         | 1         | 1         | 1         | 1         | 1         | 1         | 1         | 1         | 1         | 1         | 1         | 1         | 15         |
| Poland                    | 1         | 1         | 1         | 1         | 1         | 1         | 1         | 1         | 1         | 1         | 1         | 1         | 1         | 1         | 1         | 15         |
| Portugal                  | 1         | 1         | 1         | 0         | 0         | 0         | 1         | 1         | 1         | 1         | 1         | 1         | 1         | 1         | 0         | 11         |
| Slovakia                  | 1         | 1         | 1         | 1         | 1         | 1         | 1         | 1         | 1         | 1         | 0         | 1         | 1         | 1         | 0         | 13         |
| Slovenia                  | 1         | 1         | 1         | 1         | 1         | 1         | 1         | 1         | 1         | 1         | 1         | 1         | 1         | 1         | 1         | 15         |
| Spain                     | 1         | 1         | 1         | 1         | 1         | 1         | 1         | 1         | 1         | 1         | 1         | 1         | 1         | 1         | 1         | 15         |
| Sweden                    | 1         | 1         | 1         | 1         | 1         | 1         | 1         | 1         | 1         | 1         | 1         | 1         | 1         | 1         | 1         | 15         |
| Switzerland               | 1         | 1         | 1         | 1         | 1         | 1         | 1         | 1         | 1         | 1         | 1         | 1         | 1         | 1         | 1         | 15         |
| United Kingdom            | 1         | 1         | 1         | 1         | 1         | 1         | 1         | 1         | 1         | 1         | 1         | 1         | 1         | 1         | 1         | 15         |
| Australia                 | 1         | 1         | 1         | 1         | 0         | 1         | 1         | 1         | 1         | 1         | 1         | 1         | 1         | 1         | 1         | 14         |
| New Zealand               | 1         | 1         | 1         | 1         | 1         | 1         | 1         | 1         | 1         | 1         | 1         | 1         | 1         | 0         | 0         | 13         |
| <i>All OECD countries</i> | <i>34</i> | <i>34</i> | <i>34</i> | <i>33</i> | <i>32</i> | <i>33</i> | <i>34</i> | <i>34</i> | <i>34</i> | <i>34</i> | <i>32</i> | <i>34</i> | <i>33</i> | <i>31</i> | <i>28</i> | <i>494</i> |

Notes: Causes of death are coded according to the ICD-9 (Austria 2001; Greece 2001/2013; Ireland 2001/2006; Italy 2001/2002; Portugal 2001) or ICD-10 (all other country-years). Reference populations for some country-years were retrieved from UNdata if not available in the WHO Mortality Database (Canada 2006/2013; Chile 2001/2015; United States of America 2008/2010, 2012, 2015; Finland 2015; Ireland 2010, 2014; Switzerland 2014/2015).

**Table 1** Nolte and McKee's list of causes of death considered amenable to health care

| Disease category                              | Age  | Diseases                                                   | ICD-9 codes     | ICD-10 codes        |
|-----------------------------------------------|------|------------------------------------------------------------|-----------------|---------------------|
| Infectious diseases                           | 0-74 | Tuberculosis                                               | 010-8, 137      | A15-9, B90          |
|                                               | 0-74 | Septicaemia                                                | 038             | A40-1               |
|                                               | 0-74 | Pneumonia                                                  | 480-6           | J12-8               |
|                                               | 0-74 | Influenza                                                  | 487             | J10-1               |
|                                               | 0-14 | Intestinal infections (other than typhoid, diphtheria)     | 001-9           | A00-9               |
|                                               | 0-74 | Diphtheria, Tetanus, Poliomyelitis                         | 032, 037, 045   | A35-6, A80          |
|                                               | 0-14 | Whooping cough                                             | 033             | A37                 |
|                                               | 1-14 | Measles                                                    | 055             | B05                 |
| Cancers                                       | 0-74 | Colorectal cancer                                          | 153-4           | C18-21              |
|                                               | 0-74 | Malignant neoplasm of skin                                 | 173             | C44                 |
|                                               | 0-74 | Breast cancer                                              | 174             | C50                 |
|                                               | 0-44 | Cervical cancer and uterine cancer                         | 179, 180, 182   | C53-5               |
|                                               | 0-74 | Neoplasm of the testis                                     | 186             | C62                 |
|                                               | 0-74 | Hodgkin's disease                                          | 201             | C81                 |
|                                               | 0-44 | Leukaemia                                                  | 204-8           | C91-5               |
| Endocrine, nutritional and metabolic diseases | 0-74 | Thyroid disorders                                          | 240-6           | E00-7               |
|                                               | 0-49 | Diabetes mellitus                                          | 250             | E10-4               |
| Diseases of the nervous system                | 0-74 | Epilepsy                                                   | 345             | G40-1               |
| Diseases of the circulatory system            | 0-74 | Rheumatic heart diseases                                   | 393-8           | I05-9               |
|                                               | 0-74 | Ischemic heart diseases: 50% of deaths                     | 410-4           | I20-5               |
|                                               | 0-74 | Cerebrovascular diseases                                   | 430-8           | I60-9               |
|                                               | 0-74 | Hypertensive diseases                                      | 401-5           | I10-3, I15          |
| Diseases of the genitourinary system          | 0-74 | Nephritis and nephrosis                                    | 580-9           | N00-7, N17-9, N25-7 |
|                                               | 0-74 | Benign prostatic hyperplasia                               | 600             | N40                 |
| Diseases of the respiratory system            | 1-14 | All respiratory diseases (excl. pneumonia/influenza)       | 460-79, 488-519 | J00-9, J20-99       |
| Diseases of the digestive system              | 0-74 | Peptic ulcer                                               | 531-3           | K25-7               |
|                                               | 0-74 | Appendicitis                                               | 540-3           | K35-8               |
|                                               | 0-74 | Abdominal hernia                                           | 550-3           | K40-6               |
|                                               | 0-74 | Cholelithiasis and cholecystitis                           | 574-5           | K80-1               |
| Perinatal mortality                           | 0-74 | Maternal deaths                                            | 630-76          | O00-99              |
|                                               | 0-74 | Conditions originating in the early neonatal period        | 760-79          | P00-96              |
|                                               | 0-74 | Congenital cardiovascular anomalies                        | 745-7           | Q20-8               |
| External causes                               | 0-74 | Misadventures to patients during surgical and medical care | E870-6, E878-9  | Y60-9, Y83-4        |

Source: Nolte and McKee 2008; Gay et al. 2011.

**Table 1** Yearly Amenable Mortality Rates (Per 100,000) for Ages <1 and 1–4 Years in 34 OECD Countries, 2001/2005, 2006/2010 and 2011/2015 (See Table S1 for Country-Level Data Availability)

| Country | <1 Year                        |         |         |                   |                 | 1–4 Years                      |         |         |                   |                 |
|---------|--------------------------------|---------|---------|-------------------|-----------------|--------------------------------|---------|---------|-------------------|-----------------|
|         | Yearly Amenable Mortality Rate |         |         | % Change (95% CI) |                 | Yearly Amenable Mortality Rate |         |         | % Change (95% CI) |                 |
|         | 2001/05                        | 2006/10 | 2011/15 | 2006/10–2001/05   | 2011/15–2006/10 | 2001/05                        | 2006/10 | 2011/15 | 2006/10–2001/05   | 2011/15–2006/10 |
| CA      | 343.10                         | 343.46  | 332.97  | .1                | -3.1            | 4.34                           | 4.09    | 3.98    | -5.7              | -2.6            |
| US      | 415.80                         | 382.24  | 350.87  | -8.1*             | -8.2*           | 6.00                           | 5.46    | 5.13    | -8.9*             | -6.1            |
| CL      | 478.56                         | 457.40  | 427.15  | -4.4              | -6.6            | 10.11                          | 7.50    | 5.90    | -25.8*            | -21.3           |
| IL      | 291.77                         | 221.77  | 189.73  | -24.0*            | -14.4*          | 6.89                           | 4.62    | 3.86    | -32.9             | -16.5           |
| JP      | 150.76                         | 121.39  | 97.24   | -19.5*            | -19.9*          | 8.78                           | 7.84    | 7.15    | -10.7             | -8.7            |
| KR      | 334.41                         | 235.84  | 198.16  | -29.5*            | -16.0*          | 8.50                           | 6.69    | 4.59    | -21.3*            | -31.5*          |
| DK      | 285.08                         | 191.17  | 220.19  | -32.9*            | 15.2            | 6.16                           | 3.87    | 3.11    | -37.2             | -19.6           |
| IS      | 134.24                         | 127.50  | 85.5    | -5.0              | -32.9           | 4.74                           | 6.78    | 2.14    | 43.2              | -68.4           |
| FI      | 186.77                         | 151.76  | 109.42  | -18.7             | -27.9*          | 4.46                           | 3.25    | 2.80    | -27.2             | -14.0           |
| NO      | 207.32                         | 186.37  | 149.55  | -10.1             | -19.8           | 5.77                           | 4.56    | 3.36    | -21.0             | -26.4           |
| SE      | 178.05                         | 136.44  | 130.95  | -23.4*            | -4.0            | 4.44                           | 4.03    | 2.82    | -9.2              | -30.1           |
| AT      | 297.83                         | 243.56  | 198.02  | -18.2*            | -18.7*          | 4.72                           | 4.54    | 3.62    | -3.7              | -20.4           |
| BE      | 244.36                         | 220.91  | 198.89  | -9.6              | -10.0           | 5.25                           | 3.82    | 4.09    | -27.3             | 7.1             |
| FR      | 237.86                         | 216.89  | 211.19  | -8.8*             | -2.6            | 3.98                           | 3.73    | 2.82    | -6.2              | -24.3*          |
| DE      | 245.69                         | 223.48  | 206.37  | -9.0*             | -7.7*           | 5.31                           | 4.27    | 4.19    | -19.6*            | -1.9            |
| LU      | 218.18                         | 111.42  | 126.65  | -48.9             | 13.7            | 0.88                           | 1.76    | 1.62    | 98.8              | -7.6            |
| NL      | 306.18                         | 257.29  | 234.49  | -16.0*            | -8.9            | 4.66                           | 4.63    | 3.03    | -8                | -34.6           |
| CH      | 274.24                         | 272.00  | 251.67  | -8                | -7.5            | 4.22                           | 2.95    | 2.02    | -30.2             | -31.3           |
| IE      | 247.00                         | 198.95  | 184.09  | -19.5*            | -7.5            | 6.28                           | 2.53    | 3.18    | -59.7*            | 25.6            |
| GB      | 346.07                         | 305.01  | 256.65  | -11.9*            | -15.9*          | 6.33                           | 5.65    | 4.96    | -10.7             | -12.2           |
| GR      | 305.19                         | 218.33  | 222.92  | -28.5*            | 2.1             | 5.54                           | 5.36    | 4.62    | -3.4              | -13.8           |
| IT      | 299.93                         | 256.16  | 224.78  | -14.6*            | -12.2*          | 4.96                           | 4.05    | 4.15    | -18.4             | 2.4             |
| PT      | 300.62                         | 219.72  | 219.56  | -26.9*            | -1              | 8.41                           | 3.92    | 4.19    | -53.4*            | 6.9             |
| ES      | 272.67                         | 231.74  | 204.24  | -15.0*            | -11.9*          | 6.23                           | 5.13    | 3.59    | -17.6             | -30.0*          |
| CZ      | 259.40                         | 209.92  | 166.61  | -19.1*            | -20.6*          | 4.74                           | 4.43    | 3.24    | -6.7              | -26.9           |
| EE      | 394.90                         | 262.22  | 139.38  | -33.6*            | -46.8*          | 6.91                           | 4.89    | 7.25    | -29.3             | 48.4            |
| HU      | 530.50                         | 406.91  | 348.94  | -23.3*            | -14.2*          | 7.03                           | 6.18    | 5.80    | -12.2             | -6.0            |
| LV      | 561.36                         | 440.42  | 324.98  | -21.5*            | -26.2*          | 7.23                           | 6.54    | 3.42    | -9.5              | -47.8           |
| LT      | 412.34                         | 342.21  | 225.15  | -17.0             | -34.2*          | 7.14                           | 5.92    | 5.34    | -17.2             | -9.7            |
| PL      | 488.86                         | 400.92  | 315.70  | -18.0*            | -21.3*          | 7.81                           | 8.35    | 6.69    | 6.9               | -19.9           |
| SK      | 432.24                         | 373.71  | 345.44  | -13.5             | -7.6            | 13.09                          | 11.08   | 9.26    | -15.3             | -16.4           |
| SI      | 270.48                         | 203.78  | 143.64  | -24.7             | -29.5           | 5.01                           | 3.69    | 3.87    | -26.3             | 4.8             |
| AU      | 290.88                         | 261.16  | 212.74  | -10.2*            | -18.5*          | 5.13                           | 4.43    | 3.40    | -13.6             | -23.3           |
| NZ      | 317.89                         | 286.41  | 294.76  | -9.9              | 2.9             | 5.14                           | 4.98    | 6.23    | -3.1              | 24.9            |
| All     | 332.78                         | 295.17  | 240.22  | -11.3*            | -18.6*          | 6.27                           | 5.43    | 4.73    | -13.4             | -13.0           |

\* Percentage decrease is statistically significant ( $P < .05$ ).

Abbreviations: CA, Canada; CL, Chile; US, United State of America; IL, Israel; JP, Japan; KR, Republic of Korea; AT, Austria; BE, Belgium; CZ, Czechia; DK, Denmark; EE, Estonia; FI, Finland; FR, France; DE, Germany; GR, Greece; HU, Hungary; IS, Iceland; IE, Ireland; IT, Italy; LV, Latvia; LT, Lithuania; LU, Luxembourg; NL, Netherlands; NO, Norway; PL, Poland; PT, Portugal; SK, Slovakia; SI, Slovenia; ES, Spain; SE, Sweden; CH, Switzerland; GB, United Kingdom; AU, Australia; NZ, New Zealand.

**Table 2** Yearly Amenable Mortality Rates (Per 100,000) for Ages 5–9 and 10–14 Years in 34 OECD Countries, 2001/2005, 2006/2010 and 2011/2015 (See Table S1 for Country-Level Data Availability)

| Country | 5–9 Years                      |         |         |                   |                 | 10–14 Years                    |         |         |                   |                 |
|---------|--------------------------------|---------|---------|-------------------|-----------------|--------------------------------|---------|---------|-------------------|-----------------|
|         | Yearly Amenable Mortality Rate |         |         | % Change (95% CI) |                 | Yearly Amenable Mortality Rate |         |         | % Change (95% CI) |                 |
|         | 2001/05                        | 2006/10 | 2011/15 | 2006/10–2001/05   | 2011/15–2006/10 | 2001/05                        | 2006/10 | 2011/15 | 2006/10–2001/05   | 2011/15–2006/10 |
| CA      | 1.92                           | 2.11    | 1.38    | 9.7               | -34.6*          | 1.80                           | 1.80    | 1.91    | .3                | 5.7             |
| US      | 2.58                           | 2.38    | 2.23    | -7.6              | -6.4            | 3.06                           | 2.76    | 2.52    | -9.6              | -8.9            |
| CL      | 3.69                           | 3.17    | 2.94    | -14.1             | -7.2            | 3.72                           | 3.16    | 3.11    | -15.0             | -1.4            |
| IL      | 1.73                           | 2.05    | 2.10    | 18.2              | 2.6             | 2.54                           | 2.04    | 1.73    | -19.8             | -14.8           |
| JP      | 2.67                           | 2.50    | 2.40    | -6.2              | -3.9            | 2.55                           | 2.17    | 2.20    | -14.8             | 1.2             |
| KR      | 3.42                           | 2.39    | 1.86    | -30.1*            | -22.0           | 3.58                           | 2.55    | 1.99    | -28.9*            | -21.7           |
| DK      | 1.78                           | 1.32    | 1.21    | -25.8             | -8.4            | 2.10                           | 1.78    | 0.72    | -15.6             | -59.7           |
| IS      | 2.00                           | 2.08    | 0.94    | 4.2               | -54.9           | 1.71                           | 1.98    | 1.23    | 15.9              | -37.8           |
| FI      | 0                              | 0.94    | 1.80    | N/A               | 92.2            | 1.75                           | 4.48    | 2.81    | 156.1             | -37.2           |
| NO      | 2.73                           | 2.20    | 1.62    | -19.4             | -26.3           | 2.14                           | 1.53    | 1.49    | -28.8             | -2.6            |
| SE      | 1.45                           | 1.56    | 1.53    | 8.2               | -2.1            | 2.56                           | 1.80    | 1.83    | -29.7             | 1.6             |
| AT      | 2.35                           | 1.36    | 1.53    | -42.1             | 12.7            | 2.03                           | 2.18    | 1.62    | 7.8               | -25.9           |
| BE      | 2.02                           | 2.13    | 1.52    | 5.5               | -28.7           | 2.41                           | 1.96    | 1.53    | -18.6             | -22.1           |
| FR      | 1.89                           | 1.52    | 1.25    | -19.7             | -17.5           | 1.96                           | 1.59    | 1.41    | -18.8             | -11.5           |
| DE      | 2.33                           | 1.80    | 1.83    | -22.9             | 1.6             | 2.55                           | 2.09    | 1.78    | -18.0             | -15.1           |
| LU      | 1.38                           | 1.69    | 1.98    | 22.6              | 17.4            | 2.88                           | 1.98    | 0.64    | -31.1             | -67.5           |
| NL      | 2.14                           | 1.76    | 1.43    | -17.8             | -18.8           | 2.89                           | 2.12    | 1.85    | -26.6             | -12.7           |
| CH      | 1.52                           | 1.82    | 1.37    | 19.8              | -24.5           | 2.24                           | 1.23    | 1.58    | -45.2             | 27.9            |
| IE      | 3.03                           | 1.86    | 1.29    | -38.7             | -30.4           | 2.98                           | 2.12    | 1.96    | -28.7             | -7.8            |
| GB      | 2.98                           | 2.59    | 2.13    | -13.1             | -17.8           | 3.18                           | 2.76    | 2.35    | -13.0             | -14.8           |
| GR      | 3.13                           | 2.54    | 2.18    | -18.8             | -14.2           | 3.55                           | 2.63    | 2.79    | -25.7             | 6.0             |
| IT      | 2.36                           | 2.08    | 1.86    | -11.8             | -10.6           | 2.84                           | 2.29    | 2.19    | -19.3             | -4.2            |
| PT      | 3.23                           | 1.67    | 1.67    | -48.2*            | .1              | 4.53                           | 2.66    | 1.87    | -41.2*            | -29.7           |
| ES      | 3.04                           | 2.45    | 2.02    | -19.3             | -17.5           | 3.40                           | 2.64    | 2.14    | -22.3             | -18.9           |
| CZ      | 2.15                           | 2.26    | 2.27    | 5.2               | .7              | 2.67                           | 2.25    | 1.87    | -15.7             | -17.0           |
| EE      | 3.32                           | 3.50    | 1.40    | 5.7               | -60.2           | 4.61                           | 1.84    | 1.79    | -60.0             | -3.0            |
| HU      | 3.34                           | 2.36    | 2.44    | -29.4             | 3.3             | 3.58                           | 3.50    | 2.92    | -2.3              | -16.5           |
| LV      | 4.53                           | 4.62    | 3.53    | 1.9               | -23.4           | 3.65                           | 4.06    | 1.32    | 11.0              | -67.4*          |
| LT      | 3.82                           | 3.35    | 2.78    | -12.2             | -16.9           | 3.08                           | 4.14    | 1.21    | 34.2              | -70.7*          |
| PL      | 2.99                           | 3.14    | 2.97    | 4.9               | -5.3            | 3.03                           | 3.52    | 3.30    | 16.1              | -6.1            |
| SK      | 3.27                           | 4.34    | 3.19    | 32.7              | -26.5           | 3.70                           | 4.23    | 3.35    | 14.4              | -20.9           |
| SI      | 1.67                           | 2.20    | 1.64    | 31.6              | -25.6           | 2.61                           | 1.24    | 1.74    | -52.4             | 40.3            |
| AU      | 2.14                           | 1.81    | 1.76    | -15.6             | -2.5            | 2.24                           | 2.13    | 1.80    | -4.8              | -15.6           |
| NZ      | 2.11                           | 2.01    | 1.37    | -5.0              | -32.0           | 3.04                           | 2.71    | 2.96    | -10.6             | 9.1             |
| All     | 2.59                           | 2.28    | 2.02    | -11.9             | -11.3           | 2.87                           | 2.48    | 2.16    | -13.5             | -13.1           |

\* Percentage decrease is statistically significant ( $P < .05$ ).

**Table 1** Yearly Amenable Mortality Rates (Per 100,000) of Conditions Originating in Early Neonatal Period for Age <1 in 34 OECD Countries, 2001/2005, 2006/2010 and 2011/2015

| Country                  | Rate 2001/2005 | Rate 2006/2010 | Rate 2011/2015 | % Change 2006/10 – 2001/05 | % Change 2011/15 – 2006/10 |
|--------------------------|----------------|----------------|----------------|----------------------------|----------------------------|
| Canada                   | 293.1          | 297.1          | 290.8          | 1.3 (-7.4, 10.1)           | -2.1 (-10.3, 6.1)          |
| Chile                    | 329.3          | 341.9          | 324.2          | 3.8 (-6.2, 13.8)           | -5.2 (-14.3, 3.9)          |
| United States of America | 349.6          | 322.1          | 295.6          | -7.9 (-10.0, -5.7) *       | -8.2 (-10.5, -5.9) *       |
| Israel                   | 229.6          | 174.4          | 142.4          | -24 (-36.3, -11.7) *       | -18.3 (-32.5, -4.2) *      |
| Japan                    | 83.6           | 68.1           | 54.2           | -18.5 (-26.4, -10.7) *     | -20.4 (-29.2, -11.6) *     |
| Republic of Korea        | 262.0          | 186.9          | 160.1          | -28.7 (-34.9, -22.4) *     | -14.3 (-22.9, -5.7) *      |
| Austria                  | 250.9          | 203.5          | 162.4          | -18.9 (-36.0, -1.8) *      | -20.2 (-38.8, -1.6) *      |
| Belgium                  | 193.2          | 182.4          | 162.9          | -5.6 (-23.1, 11.9)         | -10.7 (-27.5, 6.1)         |
| Czechia                  | 209.9          | 167.0          | 136.0          | -20.4 (-36.3, -4.6) *      | -18.6 (-36.0, -1.1) *      |
| Denmark                  | 231.3          | 160.1          | 190.5          | -30.8 (-48.1, -13.4) *     | 18.9 (-12.9, 50.8)         |
| Estonia                  | 290.7          | 188.6          | 109.8          | -35.1 (-66.2, -4.0) *      | -41.8 (-77.5, -6.0) *      |
| Finland                  | 142.0          | 117.4          | 84.4           | -17.3 (-43.8, 9.2)         | 28.2 (-54.3, -2.1) *       |
| France                   | 190.6          | 175.2          | 177.1          | -8.1 (-14.9, -1.3) *       | 1.1 (-6.5, 8.7)            |
| Germany                  | 195.0          | 182.5          | 170.3          | -6.4 (-13.5, .8)           | -6.7 (-14.1, .8)           |
| Greece                   | 209.0          | 155.4          | 164.9          | -25.7 (-40.4, -10.9) *     | 6.1 (-16.4, 28.7)          |
| Hungary                  | 432.5          | 334.2          | 278.4          | -22.7 (-34.0, -11.5) *     | -16.7 (-30.5, -2.9) *      |
| Iceland                  | 119.9          | 102.0          | 67.5           | -14.9 (-121.4, 85.1)       | -33.8 (-129.2, 61.6)       |
| Ireland                  | 189.8          | 154.0          | 145.1          | -18.9 (-40.4, 2.7)         | -5.8 (-31.2, 19.6)         |
| Italy                    | 232.6          | 203.1          | 177.9          | -12.7 (-19.7, -5.7) *      | -12.4 (-20.0, -4.8) *      |
| Latvia                   | 408.7          | 348.6          | 270.5          | -14.7 (-41.0, 11.6)        | -22.4 (-49.2, 4.4)         |
| Lithuania                | 261.4          | 235.8          | 162.6          | -9.8 (-38.6, 19.1)         | -31.1 (-56.0, -6.1) *      |
| Luxembourg               | 203.1          | 104.2          | 113.3          | -48.7 (-100.4, 3.0)        | 8.7 (-111.7, 108.7)        |
| Netherlands              | 249.5          | 211.4          | 199.9          | -15.3 (-26.5, -4.1) *      | -5.4 (-19.1, 8.2)          |
| Norway                   | 166.1          | 158.6          | 123.9          | -4.5 (-31.7, 22.7)         | -21.9 (-45.6, 1.8)         |
| Poland                   | 360.4          | 306.1          | 232.3          | -15.1 (-21.7, -8.4) *      | -24.1 (-30.7, -17.5) *     |
| Portugal                 | 233.6          | 179.5          | 181.2          | -23.2 (-37.6, -8.7) *      | .9 (-20.4, 22.3)           |
| Slovakia                 | 301.7          | 256.6          | 240.2          | -15.0 (-34.1, 4.2)         | -6.4 (-28.3, 15.5)         |
| Slovenia                 | 203.7          | 168.8          | 122.3          | -17.1 (-55.7, 21.5)        | -27.6 (-64.2, 9.1)         |
| Spain                    | 209.6          | 181.7          | 166.7          | -13.3 (-21.4, -5.3) *      | -8.2 (-17.2, .7)           |
| Sweden                   | 142.5          | 103.8          | 109.4          | -27.2 (-45.3, -9.1) *      | 5.4 (-21.4, 32.2)          |
| Switzerland              | 217.4          | 233.3          | 207.7          | 7.3 (-15.7, 30.4)          | -11.0 (-29.8, 7.8)         |
| United Kingdom           | 289.4          | 256.5          | 214.1          | -11.4 (-16.9, -5.9) *      | -16.6 (-22.0, -11.2) *     |
| Australia                | 244.0          | 218.0          | 180.6          | -10.7 (-20.6, -.7) *       | -17.2 (-26.7, -7.6) *      |
| New Zealand              | 255.5          | 225.8          | 242.9          | -11.6 (-32.2, 8.9)         | 7.6 (-17.2, 32.4)          |
| All OECD countries       | 266.3          | 239.8          | 193.8          | -9.9 (-18.4, -1.5) *       | -19.2 (-27.9, -10.4) *     |

\* Percentage decrease is statistically significant ( $P < .05$ ).

**Table 2** Yearly Amenable Mortality Rates (Per 100,000) of Congenital Cardiovascular Anomalies for Age <1 in 34 OECD Countries, 2001/2005, 2006/2010 and 2011/2015

| Country                  | Rate 2001/2005 | Rate 2006/2010 | Rate 2011/2015 | % Change 2006/10 – 2001/05 | % Change 2011/15 – 2006/10 |
|--------------------------|----------------|----------------|----------------|----------------------------|----------------------------|
| Canada                   | 36.7           | 34.6           | 33.0           | -5.6 (-29.1, 17.9)         | -4.8 (-28.5, 18.9)         |
| Chile                    | 91.6           | 79.8           | 80.9           | -12.9 (-29.6, 3.7)         | 1.3 (-18.5, 21.2)          |
| United States of America | 41.6           | 35.8           | 33.5           | -13.9 (-19.9, -7.9) *      | -6.5 (-13.4, .4)           |
| Israel                   | 45.3           | 38.8           | 37.2           | -14.4 (-44.6, 15.9)        | -4.0 (-37.9, 29.9)         |
| Japan                    | 51.5           | 39.7           | 32.0           | -22.9 (-32.6, -13.3) *     | -19.3 (-30.9, -7.7) *      |
| Republic of Korea        | 59.3           | 38.3           | 32.1           | -35.4 (-47.7, -23.1) *     | -16.2 (-35.0, 2.5)         |
| Austria                  | 43.1           | 35.9           | 31.6           | -16.6 (-58.7, 25.5)        | -12.1 (-59.6, 35.5)        |
| Belgium                  | 40.8           | 29.1           | 28.2           | -28.6 (-59.7, 2.4)         | -2.9 (-47.8, 42)           |
| Czechia                  | 34.4           | 29.5           | 21.1           | -14.2 (-55.6, 27.2)        | -28.5 (-66.3, 9.3)         |
| Denmark                  | 48.9           | 25.4           | 26.1           | -47.9 (-79.0, -16.8) *     | 2.7 (-69.0, 74.3)          |
| Estonia                  | 68.9           | 59.4           | 26.8           | -13.8 (-92.5, 64.9)        | -55.0 (-108.8, -1.2) *     |
| Finland                  | 37.9           | 26.6           | 20.3           | -29.8 (-75.4, 15.8)        | -23.5 (-80.9, 33.8)        |
| France                   | 37.3           | 34.4           | 29.0           | -7.6 (-23.0, 7.9)          | -15.8 (-30.8, -.8) *       |
| Germany                  | 44.2           | 33.6           | 30.6           | -24.0 (-36.9, -11.1) *     | -8.9 (-26.0, 8.2)          |
| Greece                   | 71.7           | 43.5           | 40.9           | -39.3 (-61.1, -17.5) *     | -6.0 (-45.1, 33.0)         |
| Hungary                  | 75.6           | 69.0           | 62.6           | -8.7 (-39.2, 21.8)         | -9.3 (-41.5, 22.9)         |
| Iceland                  | 4.8            | 21.2           | 13.5           | 343.2 (-1784.6, 443.2)     | -36.5 (-239.8, 63.5)       |
| Ireland                  | 46.8           | 38.9           | 36.2           | -16.9 (-61.1, 27.3)        | -6.9 (-57.0, 43.2)         |
| Italy                    | 57.1           | 41.8           | 36.0           | -26.8 (-39.2, -14.4) *     | -13.9 (-30.5, 2.6)         |
| Latvia                   | 119.2          | 77.6           | 42.6           | -34.9 (-75.0, 5.2)         | -45.1 (-89.9, -.2) *       |
| Lithuania                | 99.8           | 79.3           | 45.4           | -20.5 (-63.2, 22.1)        | -42.7 (-80.6, -4.8) *      |
| Luxembourg               | 15.0           | 0              | 13.3           | -100 (., 0)                | N/A                        |
| Netherlands              | 47.6           | 38.4           | 28.7           | -19.4 (-44.2, 5.5)         | -25.3 (-52.3, 1.8)         |
| Norway                   | 38.4           | 23.0           | 22.0           | -39.9 (-80.4, .6)          | -4.6 (-76.6, 67.4)         |
| Poland                   | 91.5           | 69.2           | 67.0           | -24.4 (-36.5, -12.2) *     | -3.2 (-19.8, 13.4)         |
| Portugal                 | 47.7           | 33.9           | 32.0           | -29.0 (-59.3, 1.3)         | -5.5 (-52.3, 41.2)         |
| Slovakia                 | 70.2           | 64.2           | 67.4           | -8.6 (-50.5, 33.4)         | 5.0 (-42.7, 52.7)          |
| Slovenia                 | 55.5           | 29.1           | 17.6           | -47.5 (-100.8, 5.8)        | -39.5 (-117.2, 38.2)       |
| Spain                    | 54.1           | 41.7           | 31.2           | -23.1 (-37.5, -8.6) *      | -25.2 (-41.4, -9.1) *      |
| Sweden                   | 29.3           | 20.2           | 13.0           | -31.1 (-69.5, 7.2)         | -35.8 (-78.1, 6.5)         |
| Switzerland              | 46.4           | 34.2           | 39.2           | -26.4 (-64.1, 11.3)        | 14.8 (-44.9, 74.5)         |
| United Kingdom           | 42.1           | 36.2           | 33.3           | -13.8 (-28.0, .4)          | -8.1 (-23.6, 7.3)          |
| Australia                | 33.7           | 32.5           | 24.7           | -3.7 (-32.2, 24.8)         | -24.0 (-47.2, -.7) *       |
| New Zealand              | 40.6           | 37.2           | 30.6           | -8.4 (-61.3, 44.5)         | -17.8 (-67.9, 32.2)        |
| All OECD countries       | 38.8           | 47.9           | 35.0           | -18.9 (-37.3, -.5) *       | -9.9 (-33.4, 13.5)         |

\* Percentage decrease is statistically significant ( $P < .05$ ).

**Table 3** Yearly Amenable Mortality Rates (Per 100,000) of Pneumonia for Age <1 in 34 OECD Countries, 2001/2005, 2006/2010 and 2011/2015

| Country                  | Rate 2001/2005 | Rate 2006/2010 | Rate 2011/2015 | % Change 2006/10 – 2001/05 | % Change 2011/15 – 2006/10 |
|--------------------------|----------------|----------------|----------------|----------------------------|----------------------------|
| Canada                   | 3.3            | 2.6            | 1.8            | -19.9 (-89.2, 49.5)        | -32.5 (-99.2, 34.2)        |
| Chile                    | 41.0           | 24.1           | 11.7           | -41.2 (-60.0, -22.4) *     | -51.2 (-72.7, -29.7) *     |
| United States of America | 6.6            | 5.0            | 3.8            | -23.9 (-37.6, -10.1) *     | -23.8 (-39.7, -7.9) *      |
| Israel                   | 2.8            | 2.2            | 1.8            | -22.3 (-134.6, 77.7)       | -20.6 (-143.8, 79.4)       |
| Japan                    | 4.7            | 4.4            | 3.5            | -6.0 (-43.0, 31.1)         | -20.9 (-55.5, 13.7)        |
| Republic of Korea        | 2.7            | 2.1            | 1.5            | -22.7 (-87.8, 42.4)        | -30.4 (-100.6, 39.8)       |
| Austria                  | 1.3            | .5             | 1.3            | -59.9 (-207.0, 40.1)       | 142.7 (-747.1, 242.7)      |
| Belgium                  | 2.1            | 2.1            | 1.4            | -.3 (-175.2, 99.7)         | -32.4 (-160.8, 67.6)       |
| Czechia                  | 10.2           | 8.3            | 4.6            | -19.0 (-91.8, 53.9)        | -44.9 (-104.7, 14.9)       |
| Denmark                  | 2.2            | 1.2            | 1.7            | -42.6 (-200.2, 57.4)       | 38.5 (-368.6, 138.5)       |
| Estonia                  | 16.5           | 3.9            | 2.8            | -76.5 (-143.6, -9.4) *     | -27.3 (-318, 72.7)         |
| Finland                  | 1.8            | 1.7            | 1.0            | -5.0 (-268.4, 95)          | -39.6 (-232.9, 60.4)       |
| France                   | .8             | .6             | .2             | -22.5 (-113.2, 68.1)       | -69.6 (-125, -14.3) *      |
| Germany                  | 1.8            | 1.5            | 1.0            | -18.1 (-85, 48.8)          | -34.5 (-98.1, 29.1)        |
| Greece                   | 15.0           | 14.6           | 8.9            | -3.1 (-70.1, 63.8)         | -38.8 (-88.8, 11.1)        |
| Hungary                  | 16.3           | 2.1            | 3.6            | -87.2 (-106.1, -68.3) *    | 70.9 (-231, 170.9)         |
| Iceland                  | 4.8            | 0              | 0              | -100 (., 0)                | N/A                        |
| Ireland                  | 5.1            | 2.0            | 0              | -60.6 (-139.6, 18.3)       | -100 (., 0)                |
| Italy                    | 2.3            | .9             | 1.2            | -59.5 (-101, -18) *        | 29.5 (-121.4, 129.5)       |
| Latvia                   | 21.7           | 11.6           | 5.0            | -46.5 (-128.5, 35.5)       | -57.3 (-155.8, 41.3)       |
| Lithuania                | 37.2           | 19.8           | 8.6            | -46.8 (-99.5, 6)           | -56.8 (-119.7, 6)          |
| Luxembourg               | 0              | 3.6            | 0              | N/A                        | -100 (., 0)                |
| Netherlands              | 1.4            | 1.7            | .6             | 24 (-174.9, 124)           | -67.3 (-140.7, 6.2)        |
| Norway                   | 1.1            | 2.3            | 1.3            | 121.4 (-548.2, 221.4)      | -43 (-199.5, 57)           |
| Poland                   | 14.8           | 11.8           | 11.6           | -19.9 (-51.4, 11.6)        | -1.9 (-42.5, 38.7)         |
| Portugal                 | 7.4            | 1.2            | 1.4            | -83.3 (-114.7, -52) *      | 13.4 (-267.7, 113.4)       |
| Slovakia                 | 47.2           | 41.3           | 30.8           | -12.6 (-62, 36.9)          | -25.5 (-71.8, 20.8)        |
| Slovenia                 | 3.4            | 4.9            | 3.7            | 42.9 (-414.5, 142.9)       | -23.6 (-248.2, 76.4)       |
| Spain                    | 1.5            | 1.3            | .7             | -14.8 (-107.4, 77.9)       | -45 (-118.8, 28.8)         |
| Sweden                   | 1.4            | 2.8            | 3.2            | 90.5 (-291.7, 190.5)       | 14.6 (-161, 114.6)         |
| Switzerland              | 1.6            | 1.1            | 1.7            | -35.7 (-217.5, 64.3)       | 64 (-386.5, 164)           |
| United Kingdom           | 5.0            | 3.6            | 2.5            | -29.2 (-64.8, 6.3)         | -28.5 (-69.6, 12.6)        |
| Australia                | 5.3            | 3.5            | 2.0            | -34 (-88.5, 20.6)          | -41.2 (-100.3, 17.9)       |
| New Zealand              | 11.0           | 11.5           | 10.9           | 4.5 (-107.7, 104.5)        | -5.4 (-105, 94.1)          |
| All OECD countries       | 6.1            | 4.5            | 3.1            | -25.7 (-74.3, 22.9)        | -30.7 (-88.1, 26.7)        |

\* Percentage decrease is statistically significant ( $P < .05$ ).

**Table 4** Yearly Amenable Mortality Rates (Per 100,000) of Septicaemia for Age <1 in 34 OECD Countries, 2001/2005, 2006/2010 and 2011/2015

| Country                  | Rate 2001/2005 | Rate 2006/2010 | Rate 2011/2015 | % Change 2006/10 – 2001/05 | % Change 2011/15 – 2006/10 |
|--------------------------|----------------|----------------|----------------|----------------------------|----------------------------|
| Canada                   | 3.2            | 3.3            | 2.0            | 2.0 (-81.8, 85.9)          | -40.6 (-95.2, 14)          |
| Chile                    | 2.6            | 2.1            | 1.6            | -20.6 (-112.5, 71.4)       | -23.4 (-123.2, 76.4)       |
| United States of America | 7.2            | 6.1            | 4.5            | -15.5 (-29.7, -1.2) *      | -25.6 (-39.8, -11.4) *     |
| Israel                   | 4.7            | 2.5            | 2.6            | -47.4 (-113.8, 19)         | 4.1 (-138.8, 104.1)        |
| Japan                    | 6.2            | 5.0            | 4.2            | -19.9 (-48.5, 8.7)         | -15.4 (-49.4, 18.7)        |
| Republic of Korea        | 1.8            | 1.8            | .8             | 3.2 (-96.2, 102.5)         | -55 (-111, 1)              |
| Austria                  | .5             | .5             | .3             | .3 (-439.3, 100.3)         | -51.5 (-312, 48.5)         |
| Belgium                  | 2.3            | 1.6            | 1.6            | -29.2 (-159.7, 70.8)       | -2.4 (-193.7, 97.6)        |
| Czechia                  | 1.1            | 1.9            | 1.8            | 82.1 (-348.3, 182.1)       | -5.8 (-186.1, 94.2)        |
| Denmark                  | .9             | .9             | 0              | .4 (-358.8, 100.4)         | -100 (., 0)                |
| Estonia                  | 7.5            | 3.9            | 0              | -48.3 (-213.8, 51.7)       | -100 (., 0)                |
| Finland                  | 1.4            | 2.4            | 1.0            | 66.3 (-390.5, 166.3)       | -56.9 (-187.3, 43.1)       |
| France                   | 1.7            | 1.2            | 1.1            | -25.6 (-87.9, 36.6)        | -7.8 (-92.3, 76.7)         |
| Germany                  | .9             | 1.4            | 1.3            | 60.7 (-102.3, 160.7)       | -8 (-92.6, 76.6)           |
| Greece                   | 7.1            | 3.7            | 4.9            | -48.3 (-110.2, 13.5)       | 31.8 (-140.8, 131.8)       |
| Hungary                  | 1.7            | 0              | .2             | -100 (., 0)                | N/A                        |
| Iceland                  | 0              | 0              | 4.5            | N/A                        | N/A                        |
| Ireland                  | .7             | .3             | 1.4            | -57.8 (-284.2, 42.2)       | 383.5 (-1937.6, 483.5)     |
| Italy                    | 2.5            | 4.6            | 3.7            | 84.5 (-37.4, 184.5)        | -19.4 (-67.2, 28.5)        |
| Latvia                   | 4.9            | 0              | 1.0            | -100 (., 0)                | N/A                        |
| Lithuania                | 6.0            | 2.6            | 4.0            | -55.9 (-172.1, 44.1)       | 49.5 (-373.4, 149.5)       |
| Luxembourg               | 0              | 0              | 0              | N/A                        | N/A                        |
| Netherlands              | 2.9            | 1.8            | 1.3            | -36.4 (-121.5, 48.8)       | -32.3 (-147.1, 67.7)       |
| Norway                   | .7             | .7             | .7             | -5.1 (-421, 94.9)          | -.3 (-437.3, 99.7)         |
| Poland                   | 18.2           | 8.8            | 2.6            | -51.6 (-71.5, -31.7) *     | -69.9 (-91.2, -48.6) *     |
| Portugal                 | 3.5            | 2.9            | 1.9            | -16.7 (-141.4, 83.3)       | -33.9 (-157.1, 66.1)       |
| Slovakia                 | 3.5            | 3.9            | 1.8            | 12.4 (-209, 112.4)         | -54.3 (-162.3, 45.7)       |
| Slovenia                 | 2.3            | 0              | 0              | -100 (., 0)                | N/A                        |
| Spain                    | 2.1            | 2.0            | 1.3            | -6.4 (-90.6, 77.9)         | -37.1 (-102.4, 28.1)       |
| Sweden                   | 1.2            | 5.5            | 2.8            | 344.5 (-526.7, 444.5)      | -49.1 (-118.2, 20)         |
| Switzerland              | 3.6            | 1.1            | 0              | -70.3 (-144.7, 4)          | -100 (., 0)                |
| United Kingdom           | 4.4            | 3.2            | 1.6            | -28.1 (-66.3, 10.1)        | -50.3 (-84.1, -16.6) *     |
| Australia                | 2.9            | 1.8            | 1.4            | -38.4 (-108.6, 31.8)       | -21.9 (-123.2, 78.1)       |
| New Zealand              | 3.2            | 4.2            | 2.7            | 30 (-217, 130)             | -34.5 (-161.8, 65.5)       |
| All OECD countries       | 5.0            | 4.1            | 2.5            | -18 (-75.5, 39.5)          | -39.1 (-94.3, 16.1)        |

\* Percentage decrease is statistically significant ( $P < .05$ ).



**Table 5** Yearly Amenable Mortality Rates (Per 100,000) of Nephritis and Nephrosis for Age <1 in 34 OECD Countries, 2001/2005, 2006/2010 and 2011/2015

| Country                  | Rate 2001/2005 | Rate 2006/2010 | Rate 2011/2015 | % Change 2006/10 – 2001/05 | % Change 2011/15 – 2006/10 |
|--------------------------|----------------|----------------|----------------|----------------------------|----------------------------|
| Canada                   | 1.4            | .8             | .3             | -40.1 (-127.2, 47)         | -67.6 (-140.9, 5.7)        |
| Chile                    | 1.3            | .6             | .4             | -57.2 (-142.2, 27.7)       | -28.9 (-211.4, 71.1)       |
| United States of America | 4.0            | 3.2            | 2.1            | -19.7 (-38.2, -1.3) *      | -33.6 (-51.8, -15.4) *     |
| Israel                   | 4.0            | .5             | .4             | -86.9 (-117.5, -56.4) *    | -32.5 (-258.3, 67.5)       |
| Japan                    | .8             | .7             | .3             | -11.1 (-94.9, 72.6)        | -60.4 (-112.9, -7.8) *     |
| Republic of Korea        | .5             | .6             | .3             | 29.4 (-193.7, 129.4)       | -50 (-151.5, 50)           |
| Austria                  | .0             | 0              | 0              | N/A                        | N/A                        |
| Belgium                  | .2             | .5             | 0              | 176 (-1220.6, 276)         | -100 (., 0)                |
| Czechia                  | .4             | .5             | .2             | 24.1 (-472.5, 124.1)       | -65.5 (-240.2, 34.5)       |
| Denmark                  | 0              | 0              | 0              | N/A                        | N/A                        |
| Estonia                  | 0              | 0              | 0              | N/A                        | N/A                        |
| Finland                  | .4             | 0              | 1              | -100 (., 0)                | N/A                        |
| France                   | .5             | .1             | .1             | -79.1 (-129.5, -28.8) *    | -5.1 (-304, 94.9)          |
| Germany                  | .2             | .3             | .1             | 94.3 (-337.9, 194.3)       | -64.3 (-155.7, 27.2)       |
| Greece                   | 0              | .2             | 0              | N/A                        | -100 (., 0)                |
| Hungary                  | .4             | 0              | .9             | -100 (., 0)                | N/A                        |
| Iceland                  | 0              | 0              | 0              | N/A                        | N/A                        |
| Ireland                  | .3             | .6             | .3             | 68.7 (-836.7, 168.7)       | -39.6 (-341.5, 60.4)       |
| Italy                    | .9             | 1.2            | 1              | 38.5 (-126.4, 138.5)       | -14.4 (-112.8, 84)         |
| Latvia                   | 0              | 0              | 0              | N/A                        | N/A                        |
| Lithuania                | 0              | 0              | 0              | N/A                        | N/A                        |
| Luxembourg               | 0              | 0              | 0              | N/A                        | N/A                        |
| Netherlands              | .3             | .1             | .2             | -63.8 (-246.9, 36.2)       | 109.4 (-1014.6, 209.4)     |
| Norway                   | 0              | .3             | .3             | N/A                        | -.3 (-618.4, 99.7)         |
| Poland                   | .2             | .5             | .1             | 126.8 (-461.3, 226.8)      | -78.7 (-151.1, -6.2) *     |
| Portugal                 | 1.5            | .5             | 0              | -66.7 (-172.0, 33.3)       | -100 (., 0)                |
| Slovakia                 | .4             | .4             | 0              | -8.1 (-577.8, 91.9)        | -100 (., 0)                |
| Slovenia                 | 0              | 0              | 0              | N/A                        | N/A                        |
| Spain                    | .5             | .4             | .1             | -12.1 (-184.4, 87.9)       | -78 (-152.7, -3.3) *       |
| Sweden                   | 0              | .2             | 0              | N/A                        | -100 (., 0)                |
| Switzerland              | .3             | .3             | .5             | -3.6 (-601.0, 96.4)        | 87.4 (-918.6, 187.4)       |
| United Kingdom           | .6             | .5             | .2             | -20.1 (-133.9, 79.9)       | -51.5 (-138.3, 35.2)       |
| Australia                | .2             | .5             | .3             | 150.0 (-657.3, 250.0)      | -46.9 (-192.8, 53.1)       |
| New Zealand              | .4             | .3             | 0              | -10.0 (-567.8, 90.0)       | -100 (., 0)                |
| All OECD countries       | 1.8            | 1.4            | .6             | -19.9 (-114.1, 74.3)       | -58.2 (-131.3, 14.9)       |

\* Percentage decrease is statistically significant ( $P < .05$ ).

**STROBE 2007 (v4) checklist of items to be included in reports of observational studies in epidemiology\***  
**Checklist for cohort, case-control, and cross-sectional studies (combined)**

| Section/Topic             | Item # | Recommendation                                                                                                                                                                                                                                                                                                                                                                                                                                                         | Reported on page # |
|---------------------------|--------|------------------------------------------------------------------------------------------------------------------------------------------------------------------------------------------------------------------------------------------------------------------------------------------------------------------------------------------------------------------------------------------------------------------------------------------------------------------------|--------------------|
| Title and abstract        | 1      | (a) Indicate the study's design with a commonly used term in the title or the abstract                                                                                                                                                                                                                                                                                                                                                                                 | 1                  |
|                           |        | (b) Provide in the abstract an informative and balanced summary of what was done and what was found                                                                                                                                                                                                                                                                                                                                                                    | 4                  |
| <b>Introduction</b>       |        |                                                                                                                                                                                                                                                                                                                                                                                                                                                                        |                    |
| Background/rationale      | 2      | Explain the scientific background and rationale for the investigation being reported                                                                                                                                                                                                                                                                                                                                                                                   | 6                  |
| Objectives                | 3      | State specific objectives, including any pre-specified hypotheses                                                                                                                                                                                                                                                                                                                                                                                                      | 7                  |
| <b>Methods</b>            |        |                                                                                                                                                                                                                                                                                                                                                                                                                                                                        |                    |
| Study design              | 4      | Present key elements of study design early in the paper                                                                                                                                                                                                                                                                                                                                                                                                                | 7                  |
| Setting                   | 5      | Describe the setting, locations, and relevant dates, including periods of recruitment, exposure, follow-up, and data collection                                                                                                                                                                                                                                                                                                                                        | 8                  |
| Participants              | 6      | (a) <i>Cohort study</i> —Give the eligibility criteria, and the sources and methods of selection of participants. Describe methods of follow-up<br><i>Case-control study</i> —Give the eligibility criteria, and the sources and methods of case ascertainment and control selection. Give the rationale for the choice of cases and controls<br><i>Cross-sectional study</i> —Give the eligibility criteria, and the sources and methods of selection of participants | 8                  |
|                           |        | (b) <i>Cohort study</i> —For matched studies, give matching criteria and number of exposed and unexposed<br><i>Case-control study</i> —For matched studies, give matching criteria and the number of controls per case                                                                                                                                                                                                                                                 |                    |
| Variables                 | 7      | Clearly define all outcomes, exposures, predictors, potential confounders, and effect modifiers. Give diagnostic criteria, if applicable                                                                                                                                                                                                                                                                                                                               | 8                  |
| Data sources/ measurement | 8*     | For each variable of interest, give sources of data and details of methods of assessment (measurement). Describe comparability of assessment methods if there is more than one group                                                                                                                                                                                                                                                                                   | 8                  |
| Bias                      | 9      | Describe any efforts to address potential sources of bias                                                                                                                                                                                                                                                                                                                                                                                                              | 8                  |
| Study size                | 10     | Explain how the study size was arrived at                                                                                                                                                                                                                                                                                                                                                                                                                              | 8                  |
| Quantitative variables    | 11     | Explain how quantitative variables were handled in the analyses. If applicable, describe which groupings were chosen and why                                                                                                                                                                                                                                                                                                                                           | 8                  |
| Statistical methods       | 12     | (a) Describe all statistical methods, including those used to control for confounding                                                                                                                                                                                                                                                                                                                                                                                  | 8-9                |
|                           |        | (b) Describe any methods used to examine subgroups and interactions                                                                                                                                                                                                                                                                                                                                                                                                    | 8-9                |
|                           |        | (c) Explain how missing data were addressed                                                                                                                                                                                                                                                                                                                                                                                                                            | 8-9                |
|                           |        | (d) <i>Cohort study</i> —If applicable, explain how loss to follow-up was addressed<br><i>Case-control study</i> —If applicable, explain how matching of cases and controls was addressed                                                                                                                                                                                                                                                                              |                    |

|                          |     |                                                                                                                                                                                                                                                                                                                                                                                                               |              |
|--------------------------|-----|---------------------------------------------------------------------------------------------------------------------------------------------------------------------------------------------------------------------------------------------------------------------------------------------------------------------------------------------------------------------------------------------------------------|--------------|
|                          |     | <i>Cross-sectional study</i> —If applicable, describe analytical methods taking account of sampling strategy                                                                                                                                                                                                                                                                                                  |              |
|                          |     | (e) Describe any sensitivity analyses                                                                                                                                                                                                                                                                                                                                                                         |              |
| <b>Results</b>           |     |                                                                                                                                                                                                                                                                                                                                                                                                               |              |
| Participants             | 13* | (a) Report numbers of individuals at each stage of study—eg numbers potentially eligible, examined for eligibility, confirmed eligible, included in the study, completing follow-up, and analysed<br>(b) Give reasons for non-participation at each stage<br>(c) Consider use of a flow diagram                                                                                                               | 9            |
| Descriptive data         | 14* | (a) Give characteristics of study participants (eg demographic, clinical, social) and information on exposures and potential confounders<br>(b) Indicate number of participants with missing data for each variable of interest<br>(c) <i>Cohort study</i> —Summarise follow-up time (eg, average and total amount)                                                                                           | 9-10<br>9-10 |
| Outcome data             | 15* | <i>Cohort study</i> —Report numbers of outcome events or summary measures over time<br><i>Case-control study</i> —Report numbers in each exposure category, or summary measures of exposure<br><i>Cross-sectional study</i> —Report numbers of outcome events or summary measures                                                                                                                             | 9-10-11      |
| Main results             | 16  | (a) Give unadjusted estimates and, if applicable, confounder-adjusted estimates and their precision (eg, 95% confidence interval). Make clear which confounders were adjusted for and why they were included<br>(b) Report category boundaries when continuous variables were categorized<br>(c) If relevant, consider translating estimates of relative risk into absolute risk for a meaningful time period | 9-10-11      |
| Other analyses           | 17  | Report other analyses done—eg analyses of subgroups and interactions, and sensitivity analyses                                                                                                                                                                                                                                                                                                                |              |
| <b>Discussion</b>        |     |                                                                                                                                                                                                                                                                                                                                                                                                               |              |
| Key results              | 18  | Summarise key results with reference to study objectives                                                                                                                                                                                                                                                                                                                                                      | 12           |
| Limitations              | 19  | Discuss limitations of the study, taking into account sources of potential bias or imprecision. Discuss both direction and magnitude of any potential bias                                                                                                                                                                                                                                                    | 15           |
| Interpretation           | 20  | Give a cautious overall interpretation of results considering objectives, limitations, multiplicity of analyses, results from similar studies, and other relevant evidence                                                                                                                                                                                                                                    | 13-14        |
| Generalisability         | 21  | Discuss the generalisability (external validity) of the study results                                                                                                                                                                                                                                                                                                                                         | 13-14-15     |
| <b>Other information</b> |     |                                                                                                                                                                                                                                                                                                                                                                                                               |              |
| Funding                  | 22  | Give the source of funding and the role of the funders for the present study and, if applicable, for the original study on which the present article is based                                                                                                                                                                                                                                                 | 17           |

\*Give information separately for cases and controls in case-control studies and, if applicable, for exposed and unexposed groups in cohort and cross-sectional studies.

**Note:** An Explanation and Elaboration article discusses each checklist item and gives methodological background and published examples of transparent reporting. The STROBE checklist is best used in conjunction with this article (freely available on the Web sites of PLoS Medicine at <http://www.plosmedicine.org/>, Annals of Internal Medicine at <http://www.annals.org/>, and Epidemiology at <http://www.epidem.com/>). Information on the STROBE Initiative is available at [www.strobe-statement.org](http://www.strobe-statement.org).
