# Supplementary material for: Patterns of amenable child mortality over time in 34 member countries of the Organisation for Economic Co-operation and Development (OECD): evidence from a 15-year time trend analysis (2001–2015)
Source: PubMed Central journal article supplement — BMJ Open. 2019 May 22;9(5):e027909. doi: 10.1136/bmjopen-2018-027909 (PMC6538061; doi:10.1136/bmjopen-2018-027909), 2019-05-22
Supplement: bmjopen-2018-027909supp001.pdf [file bmjopen-2018-027909supp001.pdf]

**Table 1** Data Availability for the 34 OECD Countries (0 “Not Available”/1 “Available”)

| Country                   | Year      |           |           |           |           |           |           |           |           |           |           |           |           |           |           | Total      |
|---------------------------|-----------|-----------|-----------|-----------|-----------|-----------|-----------|-----------|-----------|-----------|-----------|-----------|-----------|-----------|-----------|------------|
|                           | 2001      | 2002      | 2003      | 2004      | 2005      | 2006      | 2007      | 2008      | 2009      | 2010      | 2011      | 2012      | 2013      | 2014      | 2015      |            |
| Canada                    | 1         | 1         | 1         | 1         | 1         | 1         | 1         | 1         | 1         | 1         | 1         | 1         | 1         | 0         | 0         | 13         |
| Chile                     | 1         | 1         | 1         | 1         | 1         | 1         | 1         | 1         | 1         | 1         | 1         | 1         | 1         | 1         | 1         | 15         |
| United States of America  | 1         | 1         | 1         | 1         | 1         | 1         | 1         | 1         | 1         | 1         | 0         | 1         | 0         | 0         | 1         | 12         |
| Israel                    | 1         | 1         | 1         | 1         | 1         | 1         | 1         | 1         | 1         | 1         | 1         | 1         | 1         | 1         | 1         | 15         |
| Japan                     | 1         | 1         | 1         | 1         | 1         | 1         | 1         | 1         | 1         | 1         | 1         | 1         | 1         | 1         | 1         | 15         |
| Republic of Korea         | 1         | 1         | 1         | 1         | 1         | 1         | 1         | 1         | 1         | 1         | 1         | 1         | 1         | 1         | 1         | 15         |
| Austria                   | 1         | 1         | 1         | 1         | 1         | 1         | 1         | 1         | 1         | 1         | 1         | 1         | 1         | 1         | 1         | 15         |
| Belgium                   | 1         | 1         | 1         | 1         | 1         | 1         | 1         | 1         | 1         | 1         | 1         | 1         | 1         | 1         | 1         | 15         |
| Czechia                   | 1         | 1         | 1         | 1         | 1         | 1         | 1         | 1         | 1         | 1         | 1         | 1         | 1         | 1         | 1         | 15         |
| Denmark                   | 1         | 1         | 1         | 1         | 1         | 1         | 1         | 1         | 1         | 1         | 1         | 1         | 1         | 1         | 1         | 15         |
| Estonia                   | 1         | 1         | 1         | 1         | 1         | 1         | 1         | 1         | 1         | 1         | 1         | 1         | 1         | 1         | 1         | 15         |
| Finland                   | 1         | 1         | 1         | 1         | 1         | 1         | 1         | 1         | 1         | 1         | 1         | 1         | 1         | 1         | 1         | 15         |
| France                    | 1         | 1         | 1         | 1         | 1         | 1         | 1         | 1         | 1         | 1         | 1         | 1         | 1         | 1         | 0         | 14         |
| Germany                   | 1         | 1         | 1         | 1         | 1         | 1         | 1         | 1         | 1         | 1         | 1         | 1         | 1         | 1         | 1         | 15         |
| Greece                    | 1         | 1         | 1         | 1         | 1         | 1         | 1         | 1         | 1         | 1         | 1         | 1         | 1         | 1         | 1         | 15         |
| Hungary                   | 1         | 1         | 1         | 1         | 1         | 1         | 1         | 1         | 1         | 1         | 1         | 1         | 1         | 1         | 1         | 15         |
| Iceland                   | 1         | 1         | 1         | 1         | 1         | 1         | 1         | 1         | 1         | 1         | 1         | 1         | 1         | 1         | 1         | 15         |
| Ireland                   | 1         | 1         | 1         | 1         | 1         | 1         | 1         | 1         | 1         | 1         | 1         | 1         | 1         | 1         | 0         | 14         |
| Italy                     | 1         | 1         | 1         | 1         | 1         | 1         | 1         | 1         | 1         | 1         | 1         | 1         | 1         | 1         | 1         | 15         |
| Latvia                    | 1         | 1         | 1         | 1         | 1         | 1         | 1         | 1         | 1         | 1         | 1         | 1         | 1         | 1         | 1         | 15         |
| Lithuania                 | 1         | 1         | 1         | 1         | 1         | 1         | 1         | 1         | 1         | 1         | 1         | 1         | 1         | 1         | 1         | 15         |
| Luxembourg                | 1         | 1         | 1         | 1         | 1         | 1         | 1         | 1         | 1         | 1         | 1         | 1         | 1         | 1         | 1         | 15         |
| Netherlands               | 1         | 1         | 1         | 1         | 1         | 1         | 1         | 1         | 1         | 1         | 1         | 1         | 1         | 1         | 1         | 15         |
| Norway                    | 1         | 1         | 1         | 1         | 1         | 1         | 1         | 1         | 1         | 1         | 1         | 1         | 1         | 1         | 1         | 15         |
| Poland                    | 1         | 1         | 1         | 1         | 1         | 1         | 1         | 1         | 1         | 1         | 1         | 1         | 1         | 1         | 1         | 15         |
| Portugal                  | 1         | 1         | 1         | 0         | 0         | 0         | 1         | 1         | 1         | 1         | 1         | 1         | 1         | 1         | 0         | 11         |
| Slovakia                  | 1         | 1         | 1         | 1         | 1         | 1         | 1         | 1         | 1         | 1         | 0         | 1         | 1         | 1         | 0         | 13         |
| Slovenia                  | 1         | 1         | 1         | 1         | 1         | 1         | 1         | 1         | 1         | 1         | 1         | 1         | 1         | 1         | 1         | 15         |
| Spain                     | 1         | 1         | 1         | 1         | 1         | 1         | 1         | 1         | 1         | 1         | 1         | 1         | 1         | 1         | 1         | 15         |
| Sweden                    | 1         | 1         | 1         | 1         | 1         | 1         | 1         | 1         | 1         | 1         | 1         | 1         | 1         | 1         | 1         | 15         |
| Switzerland               | 1         | 1         | 1         | 1         | 1         | 1         | 1         | 1         | 1         | 1         | 1         | 1         | 1         | 1         | 1         | 15         |
| United Kingdom            | 1         | 1         | 1         | 1         | 1         | 1         | 1         | 1         | 1         | 1         | 1         | 1         | 1         | 1         | 1         | 15         |
| Australia                 | 1         | 1         | 1         | 1         | 0         | 1         | 1         | 1         | 1         | 1         | 1         | 1         | 1         | 1         | 1         | 14         |
| New Zealand               | 1         | 1         | 1         | 1         | 1         | 1         | 1         | 1         | 1         | 1         | 1         | 1         | 1         | 0         | 0         | 13         |
| <i>All OECD countries</i> | <i>34</i> | <i>34</i> | <i>34</i> | <i>33</i> | <i>32</i> | <i>33</i> | <i>34</i> | <i>34</i> | <i>34</i> | <i>34</i> | <i>32</i> | <i>34</i> | <i>33</i> | <i>31</i> | <i>28</i> | <i>494</i> |

Notes: Causes of death are coded according to the ICD-9 (Austria 2001; Greece 2001/2013; Ireland 2001/2006; Italy 2001/2002; Portugal 2001) or ICD-10 (all other country-years). Reference populations for some country-years were retrieved from UNdata if not available in the WHO Mortality Database (Canada 2006/2013; Chile 2001/2015; United States of America 2008/2010, 2012, 2015; Finland 2015; Ireland 2010, 2014; Switzerland 2014/2015).
