# Supplementary material for: Patterns of amenable child mortality over time in 34 member countries of the Organisation for Economic Co-operation and Development (OECD): evidence from a 15-year time trend analysis (2001–2015)
Source: PubMed Central journal article supplement — BMJ Open. 2019 May 22;9(5):e027909. doi: 10.1136/bmjopen-2018-027909 (PMC6538061; doi:10.1136/bmjopen-2018-027909), 2019-05-22
Supplement: bmjopen-2018-027909supp002.pdf [file bmjopen-2018-027909supp002.pdf]

**Table 1** Nolte and McKee's list of causes of death considered amenable to health care

| Disease category                              | Age  | Diseases                                                   | ICD-9 codes     | ICD-10 codes        |
|-----------------------------------------------|------|------------------------------------------------------------|-----------------|---------------------|
| Infectious diseases                           | 0-74 | Tuberculosis                                               | 010-8, 137      | A15-9, B90          |
|                                               | 0-74 | Septicaemia                                                | 038             | A40-1               |
|                                               | 0-74 | Pneumonia                                                  | 480-6           | J12-8               |
|                                               | 0-74 | Influenza                                                  | 487             | J10-1               |
|                                               | 0-14 | Intestinal infections (other than typhoid, diphtheria)     | 001-9           | A00-9               |
|                                               | 0-74 | Diphtheria, Tetanus, Poliomyelitis                         | 032, 037, 045   | A35-6, A80          |
|                                               | 0-14 | Whooping cough                                             | 033             | A37                 |
|                                               | 1-14 | Measles                                                    | 055             | B05                 |
| Cancers                                       | 0-74 | Colorectal cancer                                          | 153-4           | C18-21              |
|                                               | 0-74 | Malignant neoplasm of skin                                 | 173             | C44                 |
|                                               | 0-74 | Breast cancer                                              | 174             | C50                 |
|                                               | 0-44 | Cervical cancer and uterine cancer                         | 179, 180, 182   | C53-5               |
|                                               | 0-74 | Neoplasm of the testis                                     | 186             | C62                 |
|                                               | 0-74 | Hodgkin's disease                                          | 201             | C81                 |
|                                               | 0-44 | Leukaemia                                                  | 204-8           | C91-5               |
| Endocrine, nutritional and metabolic diseases | 0-74 | Thyroid disorders                                          | 240-6           | E00-7               |
|                                               | 0-49 | Diabetes mellitus                                          | 250             | E10-4               |
| Diseases of the nervous system                | 0-74 | Epilepsy                                                   | 345             | G40-1               |
| Diseases of the circulatory system            | 0-74 | Rheumatic heart diseases                                   | 393-8           | I05-9               |
|                                               | 0-74 | Ischemic heart diseases: 50% of deaths                     | 410-4           | I20-5               |
|                                               | 0-74 | Cerebrovascular diseases                                   | 430-8           | I60-9               |
|                                               | 0-74 | Hypertensive diseases                                      | 401-5           | I10-3, I15          |
| Diseases of the genitourinary system          | 0-74 | Nephritis and nephrosis                                    | 580-9           | N00-7, N17-9, N25-7 |
|                                               | 0-74 | Benign prostatic hyperplasia                               | 600             | N40                 |
| Diseases of the respiratory system            | 1-14 | All respiratory diseases (excl. pneumonia/influenza)       | 460-79, 488-519 | J00-9, J20-99       |
| Diseases of the digestive system              | 0-74 | Peptic ulcer                                               | 531-3           | K25-7               |
|                                               | 0-74 | Appendicitis                                               | 540-3           | K35-8               |
|                                               | 0-74 | Abdominal hernia                                           | 550-3           | K40-6               |
|                                               | 0-74 | Cholelithiasis and cholecystitis                           | 574-5           | K80-1               |
| Perinatal mortality                           | 0-74 | Maternal deaths                                            | 630-76          | O00-99              |
|                                               | 0-74 | Conditions originating in the early neonatal period        | 760-79          | P00-96              |
|                                               | 0-74 | Congenital cardiovascular anomalies                        | 745-7           | Q20-8               |
| External causes                               | 0-74 | Misadventures to patients during surgical and medical care | E870-6, E878-9  | Y60-9, Y83-4        |

Source: Nolte and McKee 2008; Gay et al. 2011.
