# Supplementary material for: Patterns of amenable child mortality over time in 34 member countries of the Organisation for Economic Co-operation and Development (OECD): evidence from a 15-year time trend analysis (2001–2015)
Source: PubMed Central journal article supplement — BMJ Open. 2019 May 22;9(5):e027909. doi: 10.1136/bmjopen-2018-027909 (PMC6538061; doi:10.1136/bmjopen-2018-027909), 2019-05-22
Supplement: bmjopen-2018-027909supp003.pdf [file bmjopen-2018-027909supp003.pdf]

**Table 1** Yearly Amenable Mortality Rates (Per 100,000) for Ages <1 and 1–4 Years in 34 OECD Countries, 2001/2005, 2006/2010 and 2011/2015 (See Table S1 for Country-Level Data Availability)

| Country | <1 Year                        |         |         |                   |                 | 1–4 Years                      |         |         |                   |                 |
|---------|--------------------------------|---------|---------|-------------------|-----------------|--------------------------------|---------|---------|-------------------|-----------------|
|         | Yearly Amenable Mortality Rate |         |         | % Change (95% CI) |                 | Yearly Amenable Mortality Rate |         |         | % Change (95% CI) |                 |
|         | 2001/05                        | 2006/10 | 2011/15 | 2006/10–2001/05   | 2011/15–2006/10 | 2001/05                        | 2006/10 | 2011/15 | 2006/10–2001/05   | 2011/15–2006/10 |
| CA      | 343.10                         | 343.46  | 332.97  | .1                | -3.1            | 4.34                           | 4.09    | 3.98    | -5.7              | -2.6            |
| US      | 415.80                         | 382.24  | 350.87  | -8.1*             | -8.2*           | 6.00                           | 5.46    | 5.13    | -8.9*             | -6.1            |
| CL      | 478.56                         | 457.40  | 427.15  | -4.4              | -6.6            | 10.11                          | 7.50    | 5.90    | -25.8*            | -21.3           |
| IL      | 291.77                         | 221.77  | 189.73  | -24.0*            | -14.4*          | 6.89                           | 4.62    | 3.86    | -32.9             | -16.5           |
| JP      | 150.76                         | 121.39  | 97.24   | -19.5*            | -19.9*          | 8.78                           | 7.84    | 7.15    | -10.7             | -8.7            |
| KR      | 334.41                         | 235.84  | 198.16  | -29.5*            | -16.0*          | 8.50                           | 6.69    | 4.59    | -21.3*            | -31.5*          |
| DK      | 285.08                         | 191.17  | 220.19  | -32.9*            | 15.2            | 6.16                           | 3.87    | 3.11    | -37.2             | -19.6           |
| IS      | 134.24                         | 127.50  | 85.5    | -5.0              | -32.9           | 4.74                           | 6.78    | 2.14    | 43.2              | -68.4           |
| FI      | 186.77                         | 151.76  | 109.42  | -18.7             | -27.9*          | 4.46                           | 3.25    | 2.80    | -27.2             | -14.0           |
| NO      | 207.32                         | 186.37  | 149.55  | -10.1             | -19.8           | 5.77                           | 4.56    | 3.36    | -21.0             | -26.4           |
| SE      | 178.05                         | 136.44  | 130.95  | -23.4*            | -4.0            | 4.44                           | 4.03    | 2.82    | -9.2              | -30.1           |
| AT      | 297.83                         | 243.56  | 198.02  | -18.2*            | -18.7*          | 4.72                           | 4.54    | 3.62    | -3.7              | -20.4           |
| BE      | 244.36                         | 220.91  | 198.89  | -9.6              | -10.0           | 5.25                           | 3.82    | 4.09    | -27.3             | 7.1             |
| FR      | 237.86                         | 216.89  | 211.19  | -8.8*             | -2.6            | 3.98                           | 3.73    | 2.82    | -6.2              | -24.3*          |
| DE      | 245.69                         | 223.48  | 206.37  | -9.0*             | -7.7*           | 5.31                           | 4.27    | 4.19    | -19.6*            | -1.9            |
| LU      | 218.18                         | 111.42  | 126.65  | -48.9             | 13.7            | 0.88                           | 1.76    | 1.62    | 98.8              | -7.6            |
| NL      | 306.18                         | 257.29  | 234.49  | -16.0*            | -8.9            | 4.66                           | 4.63    | 3.03    | -8                | -34.6           |
| CH      | 274.24                         | 272.00  | 251.67  | -.8               | -7.5            | 4.22                           | 2.95    | 2.02    | -30.2             | -31.3           |
| IE      | 247.00                         | 198.95  | 184.09  | -19.5*            | -7.5            | 6.28                           | 2.53    | 3.18    | -59.7*            | 25.6            |
| GB      | 346.07                         | 305.01  | 256.65  | -11.9*            | -15.9*          | 6.33                           | 5.65    | 4.96    | -10.7             | -12.2           |
| GR      | 305.19                         | 218.33  | 222.92  | -28.5*            | 2.1             | 5.54                           | 5.36    | 4.62    | -3.4              | -13.8           |
| IT      | 299.93                         | 256.16  | 224.78  | -14.6*            | -12.2*          | 4.96                           | 4.05    | 4.15    | -18.4             | 2.4             |
| PT      | 300.62                         | 219.72  | 219.56  | -26.9*            | -.1             | 8.41                           | 3.92    | 4.19    | -53.4*            | 6.9             |
| ES      | 272.67                         | 231.74  | 204.24  | -15.0*            | -11.9*          | 6.23                           | 5.13    | 3.59    | -17.6             | -30.0*          |
| CZ      | 259.40                         | 209.92  | 166.61  | -19.1*            | -20.6*          | 4.74                           | 4.43    | 3.24    | -6.7              | -26.9           |
| EE      | 394.90                         | 262.22  | 139.38  | -33.6*            | -46.8*          | 6.91                           | 4.89    | 7.25    | -29.3             | 48.4            |
| HU      | 530.50                         | 406.91  | 348.94  | -23.3*            | -14.2*          | 7.03                           | 6.18    | 5.80    | -12.2             | -6.0            |
| LV      | 561.36                         | 440.42  | 324.98  | -21.5*            | -26.2*          | 7.23                           | 6.54    | 3.42    | -9.5              | -47.8           |
| LT      | 412.34                         | 342.21  | 225.15  | -17.0             | -34.2*          | 7.14                           | 5.92    | 5.34    | -17.2             | -9.7            |
| PL      | 488.86                         | 400.92  | 315.70  | -18.0*            | -21.3*          | 7.81                           | 8.35    | 6.69    | 6.9               | -19.9           |
| SK      | 432.24                         | 373.71  | 345.44  | -13.5             | -7.6            | 13.09                          | 11.08   | 9.26    | -15.3             | -16.4           |
| SI      | 270.48                         | 203.78  | 143.64  | -24.7             | -29.5           | 5.01                           | 3.69    | 3.87    | -26.3             | 4.8             |
| AU      | 290.88                         | 261.16  | 212.74  | -10.2*            | -18.5*          | 5.13                           | 4.43    | 3.40    | -13.6             | -23.3           |
| NZ      | 317.89                         | 286.41  | 294.76  | -9.9              | 2.9             | 5.14                           | 4.98    | 6.23    | -3.1              | 24.9            |
| All     | 332.78                         | 295.17  | 240.22  | -11.3*            | -18.6*          | 6.27                           | 5.43    | 4.73    | -13.4             | -13.0           |

\* Percentage decrease is statistically significant ( $P < .05$ ).

Abbreviations: CA, Canada; CL, Chile; US, United State of America; IL, Israel; JP, Japan; KR, Republic of Korea; AT, Austria; BE, Belgium; CZ, Czechia; DK, Denmark; EE, Estonia; FI, Finland; FR, France; DE, Germany; GR, Greece; HU, Hungary; IS, Iceland; IE, Ireland; IT, Italy; LV, Latvia; LT, Lithuania; LU, Luxembourg; NL, Netherlands; NO, Norway; PL, Poland; PT, Portugal; SK, Slovakia; SI, Slovenia; ES, Spain; SE, Sweden; CH, Switzerland; GB, United Kingdom; AU, Australia; NZ, New Zealand.

**Table 2** Yearly Amenable Mortality Rates (Per 100,000) for Ages 5–9 and 10–14 Years in 34 OECD Countries, 2001/2005, 2006/2010 and 2011/2015 (See Table S1 for Country-Level Data Availability)

| Country | 5–9 Years                      |         |         |                   |                 | 10–14 Years                    |         |         |                   |                 |
|---------|--------------------------------|---------|---------|-------------------|-----------------|--------------------------------|---------|---------|-------------------|-----------------|
|         | Yearly Amenable Mortality Rate |         |         | % Change (95% CI) |                 | Yearly Amenable Mortality Rate |         |         | % Change (95% CI) |                 |
|         | 2001/05                        | 2006/10 | 2011/15 | 2006/10–2001/05   | 2011/15–2006/10 | 2001/05                        | 2006/10 | 2011/15 | 2006/10–2001/05   | 2011/15–2006/10 |
| CA      | 1.92                           | 2.11    | 1.38    | 9.7               | -34.6*          | 1.80                           | 1.80    | 1.91    | .3                | 5.7             |
| US      | 2.58                           | 2.38    | 2.23    | -7.6              | -6.4            | 3.06                           | 2.76    | 2.52    | -9.6              | -8.9            |
| CL      | 3.69                           | 3.17    | 2.94    | -14.1             | -7.2            | 3.72                           | 3.16    | 3.11    | -15.0             | -1.4            |
| IL      | 1.73                           | 2.05    | 2.10    | 18.2              | 2.6             | 2.54                           | 2.04    | 1.73    | -19.8             | -14.8           |
| JP      | 2.67                           | 2.50    | 2.40    | -6.2              | -3.9            | 2.55                           | 2.17    | 2.20    | -14.8             | 1.2             |
| KR      | 3.42                           | 2.39    | 1.86    | -30.1*            | -22.0           | 3.58                           | 2.55    | 1.99    | -28.9*            | -21.7           |
| DK      | 1.78                           | 1.32    | 1.21    | -25.8             | -8.4            | 2.10                           | 1.78    | 0.72    | -15.6             | -59.7           |
| IS      | 2.00                           | 2.08    | 0.94    | 4.2               | -54.9           | 1.71                           | 1.98    | 1.23    | 15.9              | -37.8           |
| FI      | 0                              | 0.94    | 1.80    | N/A               | 92.2            | 1.75                           | 4.48    | 2.81    | 156.1             | -37.2           |
| NO      | 2.73                           | 2.20    | 1.62    | -19.4             | -26.3           | 2.14                           | 1.53    | 1.49    | -28.8             | -2.6            |
| SE      | 1.45                           | 1.56    | 1.53    | 8.2               | -2.1            | 2.56                           | 1.80    | 1.83    | -29.7             | 1.6             |
| AT      | 2.35                           | 1.36    | 1.53    | -42.1             | 12.7            | 2.03                           | 2.18    | 1.62    | 7.8               | -25.9           |
| BE      | 2.02                           | 2.13    | 1.52    | 5.5               | -28.7           | 2.41                           | 1.96    | 1.53    | -18.6             | -22.1           |
| FR      | 1.89                           | 1.52    | 1.25    | -19.7             | -17.5           | 1.96                           | 1.59    | 1.41    | -18.8             | -11.5           |
| DE      | 2.33                           | 1.80    | 1.83    | -22.9             | 1.6             | 2.55                           | 2.09    | 1.78    | -18.0             | -15.1           |
| LU      | 1.38                           | 1.69    | 1.98    | 22.6              | 17.4            | 2.88                           | 1.98    | 0.64    | -31.1             | -67.5           |
| NL      | 2.14                           | 1.76    | 1.43    | -17.8             | -18.8           | 2.89                           | 2.12    | 1.85    | -26.6             | -12.7           |
| CH      | 1.52                           | 1.82    | 1.37    | 19.8              | -24.5           | 2.24                           | 1.23    | 1.58    | -45.2             | 27.9            |
| IE      | 3.03                           | 1.86    | 1.29    | -38.7             | -30.4           | 2.98                           | 2.12    | 1.96    | -28.7             | -7.8            |
| GB      | 2.98                           | 2.59    | 2.13    | -13.1             | -17.8           | 3.18                           | 2.76    | 2.35    | -13.0             | -14.8           |
| GR      | 3.13                           | 2.54    | 2.18    | -18.8             | -14.2           | 3.55                           | 2.63    | 2.79    | -25.7             | 6.0             |
| IT      | 2.36                           | 2.08    | 1.86    | -11.8             | -10.6           | 2.84                           | 2.29    | 2.19    | -19.3             | -4.2            |
| PT      | 3.23                           | 1.67    | 1.67    | -48.2*            | .1              | 4.53                           | 2.66    | 1.87    | -41.2*            | -29.7           |
| ES      | 3.04                           | 2.45    | 2.02    | -19.3             | -17.5           | 3.40                           | 2.64    | 2.14    | -22.3             | -18.9           |
| CZ      | 2.15                           | 2.26    | 2.27    | 5.2               | .7              | 2.67                           | 2.25    | 1.87    | -15.7             | -17.0           |
| EE      | 3.32                           | 3.50    | 1.40    | 5.7               | -60.2           | 4.61                           | 1.84    | 1.79    | -60.0             | -3.0            |
| HU      | 3.34                           | 2.36    | 2.44    | -29.4             | 3.3             | 3.58                           | 3.50    | 2.92    | -2.3              | -16.5           |
| LV      | 4.53                           | 4.62    | 3.53    | 1.9               | -23.4           | 3.65                           | 4.06    | 1.32    | 11.0              | -67.4*          |
| LT      | 3.82                           | 3.35    | 2.78    | -12.2             | -16.9           | 3.08                           | 4.14    | 1.21    | 34.2              | -70.7*          |
| PL      | 2.99                           | 3.14    | 2.97    | 4.9               | -5.3            | 3.03                           | 3.52    | 3.30    | 16.1              | -6.1            |
| SK      | 3.27                           | 4.34    | 3.19    | 32.7              | -26.5           | 3.70                           | 4.23    | 3.35    | 14.4              | -20.9           |
| SI      | 1.67                           | 2.20    | 1.64    | 31.6              | -25.6           | 2.61                           | 1.24    | 1.74    | -52.4             | 40.3            |
| AU      | 2.14                           | 1.81    | 1.76    | -15.6             | -2.5            | 2.24                           | 2.13    | 1.80    | -4.8              | -15.6           |
| NZ      | 2.11                           | 2.01    | 1.37    | -5.0              | -32.0           | 3.04                           | 2.71    | 2.96    | -10.6             | 9.1             |
| All     | 2.59                           | 2.28    | 2.02    | -11.9             | -11.3           | 2.87                           | 2.48    | 2.16    | -13.5             | -13.1           |

\* Percentage decrease is statistically significant ( $P < .05$ ).
