# Supplementary material for: Patterns of amenable child mortality over time in 34 member countries of the Organisation for Economic Co-operation and Development (OECD): evidence from a 15-year time trend analysis (2001–2015)
Source: PubMed Central journal article supplement — BMJ Open. 2019 May 22;9(5):e027909. doi: 10.1136/bmjopen-2018-027909 (PMC6538061; doi:10.1136/bmjopen-2018-027909), 2019-05-22
Supplement: bmjopen-2018-027909supp004.pdf [file bmjopen-2018-027909supp004.pdf]

**Table 1** Yearly Amenable Mortality Rates (Per 100,000) of Conditions Originating in Early Neonatal Period for Age <1 in 34 OECD Countries, 2001/2005, 2006/2010 and 2011/2015

| Country                   | Rate 2001/2005 | Rate 2006/2010 | Rate 2011/2015 | % Change 2006/10 – 2001/05  | % Change 2011/15 – 2006/10    |
|---------------------------|----------------|----------------|----------------|-----------------------------|-------------------------------|
| Canada                    | 293.1          | 297.1          | 290.8          | 1.3 (-7.4, 10.1)            | -2.1 (-10.3, 6.1)             |
| Chile                     | 329.3          | 341.9          | 324.2          | 3.8 (-6.2, 13.8)            | -5.2 (-14.3, 3.9)             |
| United States of America  | 349.6          | 322.1          | 295.6          | -7.9 (-10.0, -5.7) *        | -8.2 (-10.5, -5.9) *          |
| Israel                    | 229.6          | 174.4          | 142.4          | -24 (-36.3, -11.7) *        | -18.3 (-32.5, -4.2) *         |
| Japan                     | 83.6           | 68.1           | 54.2           | -18.5 (-26.4, -10.7) *      | -20.4 (-29.2, -11.6) *        |
| Republic of Korea         | 262.0          | 186.9          | 160.1          | -28.7 (-34.9, -22.4) *      | -14.3 (-22.9, -5.7) *         |
| Austria                   | 250.9          | 203.5          | 162.4          | -18.9 (-36.0, -1.8) *       | -20.2 (-38.8, -1.6) *         |
| Belgium                   | 193.2          | 182.4          | 162.9          | -5.6 (-23.1, 11.9)          | -10.7 (-27.5, 6.1)            |
| Czechia                   | 209.9          | 167.0          | 136.0          | -20.4 (-36.3, -4.6) *       | -18.6 (-36.0, -1.1) *         |
| Denmark                   | 231.3          | 160.1          | 190.5          | -30.8 (-48.1, -13.4) *      | 18.9 (-12.9, 50.8)            |
| Estonia                   | 290.7          | 188.6          | 109.8          | -35.1 (-66.2, -4.0) *       | -41.8 (-77.5, -6.0) *         |
| Finland                   | 142.0          | 117.4          | 84.4           | -17.3 (-43.8, 9.2)          | 28.2 (-54.3, -2.1) *          |
| France                    | 190.6          | 175.2          | 177.1          | -8.1 (-14.9, -1.3) *        | 1.1 (-6.5, 8.7)               |
| Germany                   | 195.0          | 182.5          | 170.3          | -6.4 (-13.5, .8)            | -6.7 (-14.1, .8)              |
| Greece                    | 209.0          | 155.4          | 164.9          | -25.7 (-40.4, -10.9) *      | 6.1 (-16.4, 28.7)             |
| Hungary                   | 432.5          | 334.2          | 278.4          | -22.7 (-34.0, -11.5) *      | -16.7 (-30.5, -2.9) *         |
| Iceland                   | 119.9          | 102.0          | 67.5           | -14.9 (-121.4, 85.1)        | -33.8 (-129.2, 61.6)          |
| Ireland                   | 189.8          | 154.0          | 145.1          | -18.9 (-40.4, 2.7)          | -5.8 (-31.2, 19.6)            |
| Italy                     | 232.6          | 203.1          | 177.9          | -12.7 (-19.7, -5.7) *       | -12.4 (-20.0, -4.8) *         |
| Latvia                    | 408.7          | 348.6          | 270.5          | -14.7 (-41.0, 11.6)         | -22.4 (-49.2, 4.4)            |
| Lithuania                 | 261.4          | 235.8          | 162.6          | -9.8 (-38.6, 19.1)          | -31.1 (-56.0, -6.1) *         |
| Luxembourg                | 203.1          | 104.2          | 113.3          | -48.7 (-100.4, 3.0)         | 8.7 (-111.7, 108.7)           |
| Netherlands               | 249.5          | 211.4          | 199.9          | -15.3 (-26.5, -4.1) *       | -5.4 (-19.1, 8.2)             |
| Norway                    | 166.1          | 158.6          | 123.9          | -4.5 (-31.7, 22.7)          | -21.9 (-45.6, 1.8)            |
| Poland                    | 360.4          | 306.1          | 232.3          | -15.1 (-21.7, -8.4) *       | -24.1 (-30.7, -17.5) *        |
| Portugal                  | 233.6          | 179.5          | 181.2          | -23.2 (-37.6, -8.7) *       | .9 (-20.4, 22.3)              |
| Slovakia                  | 301.7          | 256.6          | 240.2          | -15.0 (-34.1, 4.2)          | -6.4 (-28.3, 15.5)            |
| Slovenia                  | 203.7          | 168.8          | 122.3          | -17.1 (-55.7, 21.5)         | -27.6 (-64.2, 9.1)            |
| Spain                     | 209.6          | 181.7          | 166.7          | -13.3 (-21.4, -5.3) *       | -8.2 (-17.2, .7)              |
| Sweden                    | 142.5          | 103.8          | 109.4          | -27.2 (-45.3, -9.1) *       | 5.4 (-21.4, 32.2)             |
| Switzerland               | 217.4          | 233.3          | 207.7          | 7.3 (-15.7, 30.4)           | -11.0 (-29.8, 7.8)            |
| United Kingdom            | 289.4          | 256.5          | 214.1          | -11.4 (-16.9, -5.9) *       | -16.6 (-22.0, -11.2) *        |
| Australia                 | 244.0          | 218.0          | 180.6          | -10.7 (-20.6, -.7) *        | -17.2 (-26.7, -7.6) *         |
| New Zealand               | 255.5          | 225.8          | 242.9          | -11.6 (-32.2, 8.9)          | 7.6 (-17.2, 32.4)             |
| <i>All OECD countries</i> | <i>266.3</i>   | <i>239.8</i>   | <i>193.8</i>   | <i>-9.9 (-18.4, -1.5) *</i> | <i>-19.2 (-27.9, -10.4) *</i> |

\* Percentage decrease is statistically significant ( $P < .05$ ).

**Table 2** Yearly Amenable Mortality Rates (Per 100,000) of Congenital Cardiovascular Anomalies for Age <1 in 34 OECD Countries, 2001/2005, 2006/2010 and 2011/2015

| Country                   | Rate 2001/2005 | Rate 2006/2010 | Rate 2011/2015 | % Change 2006/10 – 2001/05 | % Change 2011/15 – 2006/10 |
|---------------------------|----------------|----------------|----------------|----------------------------|----------------------------|
| Canada                    | 36.7           | 34.6           | 33.0           | -5.6 (-29.1, 17.9)         | -4.8 (-28.5, 18.9)         |
| Chile                     | 91.6           | 79.8           | 80.9           | -12.9 (-29.6, 3.7)         | 1.3 (-18.5, 21.2)          |
| United States of America  | 41.6           | 35.8           | 33.5           | -13.9 (-19.9, -7.9) *      | -6.5 (-13.4, .4)           |
| Israel                    | 45.3           | 38.8           | 37.2           | -14.4 (-44.6, 15.9)        | -4.0 (-37.9, 29.9)         |
| Japan                     | 51.5           | 39.7           | 32.0           | -22.9 (-32.6, -13.3) *     | -19.3 (-30.9, -7.7) *      |
| Republic of Korea         | 59.3           | 38.3           | 32.1           | -35.4 (-47.7, -23.1) *     | -16.2 (-35.0, 2.5)         |
| Austria                   | 43.1           | 35.9           | 31.6           | -16.6 (-58.7, 25.5)        | -12.1 (-59.6, 35.5)        |
| Belgium                   | 40.8           | 29.1           | 28.2           | -28.6 (-59.7, 2.4)         | -2.9 (-47.8, 42)           |
| Czechia                   | 34.4           | 29.5           | 21.1           | -14.2 (-55.6, 27.2)        | -28.5 (-66.3, 9.3)         |
| Denmark                   | 48.9           | 25.4           | 26.1           | -47.9 (-79.0, -16.8) *     | 2.7 (-69.0, 74.3)          |
| Estonia                   | 68.9           | 59.4           | 26.8           | -13.8 (-92.5, 64.9)        | -55.0 (-108.8, -1.2) *     |
| Finland                   | 37.9           | 26.6           | 20.3           | -29.8 (-75.4, 15.8)        | -23.5 (-80.9, 33.8)        |
| France                    | 37.3           | 34.4           | 29.0           | -7.6 (-23.0, 7.9)          | -15.8 (-30.8, -.8) *       |
| Germany                   | 44.2           | 33.6           | 30.6           | -24.0 (-36.9, -11.1) *     | -8.9 (-26.0, 8.2)          |
| Greece                    | 71.7           | 43.5           | 40.9           | -39.3 (-61.1, -17.5) *     | -6.0 (-45.1, 33.0)         |
| Hungary                   | 75.6           | 69.0           | 62.6           | -8.7 (-39.2, 21.8)         | -9.3 (-41.5, 22.9)         |
| Iceland                   | 4.8            | 21.2           | 13.5           | 343.2 (-1784.6, 443.2)     | -36.5 (-239.8, 63.5)       |
| Ireland                   | 46.8           | 38.9           | 36.2           | -16.9 (-61.1, 27.3)        | -6.9 (-57.0, 43.2)         |
| Italy                     | 57.1           | 41.8           | 36.0           | -26.8 (-39.2, -14.4) *     | -13.9 (-30.5, 2.6)         |
| Latvia                    | 119.2          | 77.6           | 42.6           | -34.9 (-75.0, 5.2)         | -45.1 (-89.9, -.2) *       |
| Lithuania                 | 99.8           | 79.3           | 45.4           | -20.5 (-63.2, 22.1)        | -42.7 (-80.6, -4.8) *      |
| Luxembourg                | 15.0           | 0              | 13.3           | -100 (., 0)                | N/A                        |
| Netherlands               | 47.6           | 38.4           | 28.7           | -19.4 (-44.2, 5.5)         | -25.3 (-52.3, 1.8)         |
| Norway                    | 38.4           | 23.0           | 22.0           | -39.9 (-80.4, .6)          | -4.6 (-76.6, 67.4)         |
| Poland                    | 91.5           | 69.2           | 67.0           | -24.4 (-36.5, -12.2) *     | -3.2 (-19.8, 13.4)         |
| Portugal                  | 47.7           | 33.9           | 32.0           | -29.0 (-59.3, 1.3)         | -5.5 (-52.3, 41.2)         |
| Slovakia                  | 70.2           | 64.2           | 67.4           | -8.6 (-50.5, 33.4)         | 5.0 (-42.7, 52.7)          |
| Slovenia                  | 55.5           | 29.1           | 17.6           | -47.5 (-100.8, 5.8)        | -39.5 (-117.2, 38.2)       |
| Spain                     | 54.1           | 41.7           | 31.2           | -23.1 (-37.5, -8.6) *      | -25.2 (-41.4, -9.1) *      |
| Sweden                    | 29.3           | 20.2           | 13.0           | -31.1 (-69.5, 7.2)         | -35.8 (-78.1, 6.5)         |
| Switzerland               | 46.4           | 34.2           | 39.2           | -26.4 (-64.1, 11.3)        | 14.8 (-44.9, 74.5)         |
| United Kingdom            | 42.1           | 36.2           | 33.3           | -13.8 (-28.0, .4)          | -8.1 (-23.6, 7.3)          |
| Australia                 | 33.7           | 32.5           | 24.7           | -3.7 (-32.2, 24.8)         | -24.0 (-47.2, -.7) *       |
| New Zealand               | 40.6           | 37.2           | 30.6           | -8.4 (-61.3, 44.5)         | -17.8 (-67.9, 32.2)        |
| <i>All OECD countries</i> | 38.8           | 47.9           | 35.0           | -18.9 (-37.3, -.5) *       | -9.9 (-33.4, 13.5)         |

\* Percentage decrease is statistically significant ( $P < .05$ ).

**Table 3** Yearly Amenable Mortality Rates (Per 100,000) of Pneumonia for Age <1 in 34 OECD Countries, 2001/2005, 2006/2010 and 2011/2015

| Country                   | Rate 2001/2005 | Rate 2006/2010 | Rate 2011/2015 | % Change 2006/10 – 2001/05 | % Change 2011/15 – 2006/10 |
|---------------------------|----------------|----------------|----------------|----------------------------|----------------------------|
| Canada                    | 3.3            | 2.6            | 1.8            | -19.9 (-89.2, 49.5)        | -32.5 (-99.2, 34.2)        |
| Chile                     | 41.0           | 24.1           | 11.7           | -41.2 (-60.0, -22.4) *     | -51.2 (-72.7, -29.7) *     |
| United States of America  | 6.6            | 5.0            | 3.8            | -23.9 (-37.6, -10.1) *     | -23.8 (-39.7, -7.9) *      |
| Israel                    | 2.8            | 2.2            | 1.8            | -22.3 (-134.6, 77.7)       | -20.6 (-143.8, 79.4)       |
| Japan                     | 4.7            | 4.4            | 3.5            | -6.0 (-43.0, 31.1)         | -20.9 (-55.5, 13.7)        |
| Republic of Korea         | 2.7            | 2.1            | 1.5            | -22.7 (-87.8, 42.4)        | -30.4 (-100.6, 39.8)       |
| Austria                   | 1.3            | .5             | 1.3            | -59.9 (-207.0, 40.1)       | 142.7 (-747.1, 242.7)      |
| Belgium                   | 2.1            | 2.1            | 1.4            | -.3 (-175.2, 99.7)         | -32.4 (-160.8, 67.6)       |
| Czechia                   | 10.2           | 8.3            | 4.6            | -19.0 (-91.8, 53.9)        | -44.9 (-104.7, 14.9)       |
| Denmark                   | 2.2            | 1.2            | 1.7            | -42.6 (-200.2, 57.4)       | 38.5 (-368.6, 138.5)       |
| Estonia                   | 16.5           | 3.9            | 2.8            | -76.5 (-143.6, -9.4) *     | -27.3 (-318, 72.7)         |
| Finland                   | 1.8            | 1.7            | 1.0            | -5.0 (-268.4, 95)          | -39.6 (-232.9, 60.4)       |
| France                    | .8             | .6             | .2             | -22.5 (-113.2, 68.1)       | -69.6 (-125, -14.3) *      |
| Germany                   | 1.8            | 1.5            | 1.0            | -18.1 (-85, 48.8)          | -34.5 (-98.1, 29.1)        |
| Greece                    | 15.0           | 14.6           | 8.9            | -3.1 (-70.1, 63.8)         | -38.8 (-88.8, 11.1)        |
| Hungary                   | 16.3           | 2.1            | 3.6            | -87.2 (-106.1, -68.3) *    | 70.9 (-231, 170.9)         |
| Iceland                   | 4.8            | 0              | 0              | -100 (., 0)                | N/A                        |
| Ireland                   | 5.1            | 2.0            | 0              | -60.6 (-139.6, 18.3)       | -100 (., 0)                |
| Italy                     | 2.3            | .9             | 1.2            | -59.5 (-101, -18) *        | 29.5 (-121.4, 129.5)       |
| Latvia                    | 21.7           | 11.6           | 5.0            | -46.5 (-128.5, 35.5)       | -57.3 (-155.8, 41.3)       |
| Lithuania                 | 37.2           | 19.8           | 8.6            | -46.8 (-99.5, 6)           | -56.8 (-119.7, 6)          |
| Luxembourg                | 0              | 3.6            | 0              | N/A                        | -100 (., 0)                |
| Netherlands               | 1.4            | 1.7            | .6             | 24 (-174.9, 124)           | -67.3 (-140.7, 6.2)        |
| Norway                    | 1.1            | 2.3            | 1.3            | 121.4 (-548.2, 221.4)      | -43 (-199.5, 57)           |
| Poland                    | 14.8           | 11.8           | 11.6           | -19.9 (-51.4, 11.6)        | -1.9 (-42.5, 38.7)         |
| Portugal                  | 7.4            | 1.2            | 1.4            | -83.3 (-114.7, -52) *      | 13.4 (-267.7, 113.4)       |
| Slovakia                  | 47.2           | 41.3           | 30.8           | -12.6 (-62, 36.9)          | -25.5 (-71.8, 20.8)        |
| Slovenia                  | 3.4            | 4.9            | 3.7            | 42.9 (-414.5, 142.9)       | -23.6 (-248.2, 76.4)       |
| Spain                     | 1.5            | 1.3            | .7             | -14.8 (-107.4, 77.9)       | -45 (-118.8, 28.8)         |
| Sweden                    | 1.4            | 2.8            | 3.2            | 90.5 (-291.7, 190.5)       | 14.6 (-161, 114.6)         |
| Switzerland               | 1.6            | 1.1            | 1.7            | -35.7 (-217.5, 64.3)       | 64 (-386.5, 164)           |
| United Kingdom            | 5.0            | 3.6            | 2.5            | -29.2 (-64.8, 6.3)         | -28.5 (-69.6, 12.6)        |
| Australia                 | 5.3            | 3.5            | 2.0            | -34 (-88.5, 20.6)          | -41.2 (-100.3, 17.9)       |
| New Zealand               | 11.0           | 11.5           | 10.9           | 4.5 (-107.7, 104.5)        | -5.4 (-105, 94.1)          |
| <i>All OECD countries</i> | 6.1            | 4.5            | 3.1            | -25.7 (-74.3, 22.9)        | -30.7 (-88.1, 26.7)        |

\* Percentage decrease is statistically significant ( $P < .05$ ).

**Table 4** Yearly Amenable Mortality Rates (Per 100,000) of Septicaemia for Age <1 in 34 OECD Countries, 2001/2005, 2006/2010 and 2011/2015

| Country                   | Rate 2001/2005 | Rate 2006/2010 | Rate 2011/2015 | % Change 2006/10 – 2001/05 | % Change 2011/15 – 2006/10 |
|---------------------------|----------------|----------------|----------------|----------------------------|----------------------------|
| Canada                    | 3.2            | 3.3            | 2.0            | 2.0 (-81.8, 85.9)          | -40.6 (-95.2, 14)          |
| Chile                     | 2.6            | 2.1            | 1.6            | -20.6 (-112.5, 71.4)       | -23.4 (-123.2, 76.4)       |
| United States of America  | 7.2            | 6.1            | 4.5            | -15.5 (-29.7, -1.2) *      | -25.6 (-39.8, -11.4) *     |
| Israel                    | 4.7            | 2.5            | 2.6            | -47.4 (-113.8, 19)         | 4.1 (-138.8, 104.1)        |
| Japan                     | 6.2            | 5.0            | 4.2            | -19.9 (-48.5, 8.7)         | -15.4 (-49.4, 18.7)        |
| Republic of Korea         | 1.8            | 1.8            | .8             | 3.2 (-96.2, 102.5)         | -55 (-111, 1)              |
| Austria                   | .5             | .5             | .3             | .3 (-439.3, 100.3)         | -51.5 (-312, 48.5)         |
| Belgium                   | 2.3            | 1.6            | 1.6            | -29.2 (-159.7, 70.8)       | -2.4 (-193.7, 97.6)        |
| Czechia                   | 1.1            | 1.9            | 1.8            | 82.1 (-348.3, 182.1)       | -5.8 (-186.1, 94.2)        |
| Denmark                   | .9             | .9             | 0              | .4 (-358.8, 100.4)         | -100 (., 0)                |
| Estonia                   | 7.5            | 3.9            | 0              | -48.3 (-213.8, 51.7)       | -100 (., 0)                |
| Finland                   | 1.4            | 2.4            | 1.0            | 66.3 (-390.5, 166.3)       | -56.9 (-187.3, 43.1)       |
| France                    | 1.7            | 1.2            | 1.1            | -25.6 (-87.9, 36.6)        | -7.8 (-92.3, 76.7)         |
| Germany                   | .9             | 1.4            | 1.3            | 60.7 (-102.3, 160.7)       | -8 (-92.6, 76.6)           |
| Greece                    | 7.1            | 3.7            | 4.9            | -48.3 (-110.2, 13.5)       | 31.8 (-140.8, 131.8)       |
| Hungary                   | 1.7            | 0              | .2             | -100 (., 0)                | N/A                        |
| Iceland                   | 0              | 0              | 4.5            | N/A                        | N/A                        |
| Ireland                   | .7             | .3             | 1.4            | -57.8 (-284.2, 42.2)       | 383.5 (-1937.6, 483.5)     |
| Italy                     | 2.5            | 4.6            | 3.7            | 84.5 (-37.4, 184.5)        | -19.4 (-67.2, 28.5)        |
| Latvia                    | 4.9            | 0              | 1.0            | -100 (., 0)                | N/A                        |
| Lithuania                 | 6.0            | 2.6            | 4.0            | -55.9 (-172.1, 44.1)       | 49.5 (-373.4, 149.5)       |
| Luxembourg                | 0              | 0              | 0              | N/A                        | N/A                        |
| Netherlands               | 2.9            | 1.8            | 1.3            | -36.4 (-121.5, 48.8)       | -32.3 (-147.1, 67.7)       |
| Norway                    | .7             | .7             | .7             | -5.1 (-421, 94.9)          | -.3 (-437.3, 99.7)         |
| Poland                    | 18.2           | 8.8            | 2.6            | -51.6 (-71.5, -31.7) *     | -69.9 (-91.2, -48.6) *     |
| Portugal                  | 3.5            | 2.9            | 1.9            | -16.7 (-141.4, 83.3)       | -33.9 (-157.1, 66.1)       |
| Slovakia                  | 3.5            | 3.9            | 1.8            | 12.4 (-209, 112.4)         | -54.3 (-162.3, 45.7)       |
| Slovenia                  | 2.3            | 0              | 0              | -100 (., 0)                | N/A                        |
| Spain                     | 2.1            | 2.0            | 1.3            | -6.4 (-90.6, 77.9)         | -37.1 (-102.4, 28.1)       |
| Sweden                    | 1.2            | 5.5            | 2.8            | 344.5 (-526.7, 444.5)      | -49.1 (-118.2, 20)         |
| Switzerland               | 3.6            | 1.1            | 0              | -70.3 (-144.7, 4)          | -100 (., 0)                |
| United Kingdom            | 4.4            | 3.2            | 1.6            | -28.1 (-66.3, 10.1)        | -50.3 (-84.1, -16.6) *     |
| Australia                 | 2.9            | 1.8            | 1.4            | -38.4 (-108.6, 31.8)       | -21.9 (-123.2, 78.1)       |
| New Zealand               | 3.2            | 4.2            | 2.7            | 30 (-217, 130)             | -34.5 (-161.8, 65.5)       |
| <i>All OECD countries</i> | 5.0            | 4.1            | 2.5            | -18 (-75.5, 39.5)          | -39.1 (-94.3, 16.1)        |

\* Percentage decrease is statistically significant ( $P < .05$ ).

**Table 5** Yearly Amenable Mortality Rates (Per 100,000) of Nephritis and Nephrosis for Age <1 in 34 OECD Countries, 2001/2005, 2006/2010 and 2011/2015

| Country                   | Rate 2001/2005 | Rate 2006/2010 | Rate 2011/2015 | % Change 2006/10 – 2001/05 | % Change 2011/15 – 2006/10 |
|---------------------------|----------------|----------------|----------------|----------------------------|----------------------------|
| Canada                    | 1.4            | .8             | .3             | -40.1 (-127.2, 47)         | -67.6 (-140.9, 5.7)        |
| Chile                     | 1.3            | .6             | .4             | -57.2 (-142.2, 27.7)       | -28.9 (-211.4, 71.1)       |
| United States of America  | 4.0            | 3.2            | 2.1            | -19.7 (-38.2, -1.3) *      | -33.6 (-51.8, -15.4) *     |
| Israel                    | 4.0            | .5             | .4             | -86.9 (-117.5, -56.4) *    | -32.5 (-258.3, 67.5)       |
| Japan                     | .8             | .7             | .3             | -11.1 (-94.9, 72.6)        | -60.4 (-112.9, -7.8) *     |
| Republic of Korea         | .5             | .6             | .3             | 29.4 (-193.7, 129.4)       | -50 (-151.5, 50)           |
| Austria                   | .0             | 0              | 0              | N/A                        | N/A                        |
| Belgium                   | .2             | .5             | 0              | 176 (-1220.6, 276)         | -100 (., 0)                |
| Czechia                   | .4             | .5             | .2             | 24.1 (-472.5, 124.1)       | -65.5 (-240.2, 34.5)       |
| Denmark                   | 0              | 0              | 0              | N/A                        | N/A                        |
| Estonia                   | 0              | 0              | 0              | N/A                        | N/A                        |
| Finland                   | .4             | 0              | 1              | -100 (., 0)                | N/A                        |
| France                    | .5             | .1             | .1             | -79.1 (-129.5, -28.8) *    | -5.1 (-304, 94.9)          |
| Germany                   | .2             | .3             | .1             | 94.3 (-337.9, 194.3)       | -64.3 (-155.7, 27.2)       |
| Greece                    | 0              | .2             | 0              | N/A                        | -100 (., 0)                |
| Hungary                   | .4             | 0              | .9             | -100 (., 0)                | N/A                        |
| Iceland                   | 0              | 0              | 0              | N/A                        | N/A                        |
| Ireland                   | .3             | .6             | .3             | 68.7 (-836.7, 168.7)       | -39.6 (-341.5, 60.4)       |
| Italy                     | .9             | 1.2            | 1              | 38.5 (-126.4, 138.5)       | -14.4 (-112.8, 84)         |
| Latvia                    | 0              | 0              | 0              | N/A                        | N/A                        |
| Lithuania                 | 0              | 0              | 0              | N/A                        | N/A                        |
| Luxembourg                | 0              | 0              | 0              | N/A                        | N/A                        |
| Netherlands               | .3             | .1             | .2             | -63.8 (-246.9, 36.2)       | 109.4 (-1014.6, 209.4)     |
| Norway                    | 0              | .3             | .3             | N/A                        | -.3 (-618.4, 99.7)         |
| Poland                    | .2             | .5             | .1             | 126.8 (-461.3, 226.8)      | -78.7 (-151.1, -6.2) *     |
| Portugal                  | 1.5            | .5             | 0              | -66.7 (-172.0, 33.3)       | -100 (., 0)                |
| Slovakia                  | .4             | .4             | 0              | -8.1 (-577.8, 91.9)        | -100 (., 0)                |
| Slovenia                  | 0              | 0              | 0              | N/A                        | N/A                        |
| Spain                     | .5             | .4             | .1             | -12.1 (-184.4, 87.9)       | -78 (-152.7, -3.3) *       |
| Sweden                    | 0              | .2             | 0              | N/A                        | -100 (., 0)                |
| Switzerland               | .3             | .3             | .5             | -3.6 (-601.0, 96.4)        | 87.4 (-918.6, 187.4)       |
| United Kingdom            | .6             | .5             | .2             | -20.1 (-133.9, 79.9)       | -51.5 (-138.3, 35.2)       |
| Australia                 | .2             | .5             | .3             | 150.0 (-657.3, 250.0)      | -46.9 (-192.8, 53.1)       |
| New Zealand               | .4             | .3             | 0              | -10.0 (-567.8, 90.0)       | -100 (., 0)                |
| <i>All OECD countries</i> | 1.8            | 1.4            | .6             | -19.9 (-114.1, 74.3)       | -58.2 (-131.3, 14.9)       |

\* Percentage decrease is statistically significant ( $P < .05$ ).
